# Supplementary material for: A splicing factor switch controls hematopoietic lineage specification of pluripotent stem cells
Source: PubMed Central journal article supplement — EMBO Rep. 2020 Dec 15;22(1):e50535. doi: 10.15252/embr.202050535 (PMC7788460; doi:10.15252/embr.202050535), 2020-12-15
Supplement: EMBR-22-e50535-s001.pdf [file EMBR-22-e50535-s001.pdf]

## Expanded View Figures

### Figure EV1. Pervasive and dynamic alternative splicing occurs during human hematopoietic differentiation induced from hESCs.

- A Principal component analysis (PCA) of genes (left) and transcripts (right) in highly purified cells at various differentiation stages, including ESCs, APLNR<sup>+</sup> cells, CD31<sup>+</sup>CD34<sup>+</sup> cells, and CD43<sup>+</sup> cells during hematopoietic differentiation induction from hESCs.
- B Widespread occurrence (> 85% of expressed genes) of alternative splicing in expressed genes (FPKM > 1 in at least one differentiation stage) at distinct differentiation stages during hematopoietic development.
- C Average number of isoforms per gene at each differentiation stage.
- D Analysis of isoform variants within each expressing gene at distinct differentiation stages.
- E Number and frequency of five major splicing events at distinct differentiation stages, including mutually exclusive exon (MXE), alternative 5' splicing (A5SS), alternative 3' splicing (A3SS), intron retention (IR), and exon skipping (ES). The cutoff of splicing event of an expressed gene is  $0.05 < \text{PSI} < 0.95$ .
- F Heatmap showing the genes within the minor spliceosomal machinery ( $n = 52$ ) at the indicated stages. The heatmap was row normalized. The heatmap was scaled with Z-Score using the  $\log_2(\text{FPKM})$  expression of indicated components within the minor spliceosomal machinery.
- G Frequency of splicing site at different differentiation stages.
- H The elbow plot assessing the potential clusters of the dynamic splicing factors expression in the heatmap of Fig 1 (C).
- I Heatmap showing the genes in the hnRNP family at the indicated stages. The heatmap was row normalized. The heatmap was scaled with Z-Score using the  $\log_2(\text{FPKM})$  expression of indicated genes.

Data information: Results given are mean  $\pm$  SD. For all panels  $n = 3$  technical replicates.

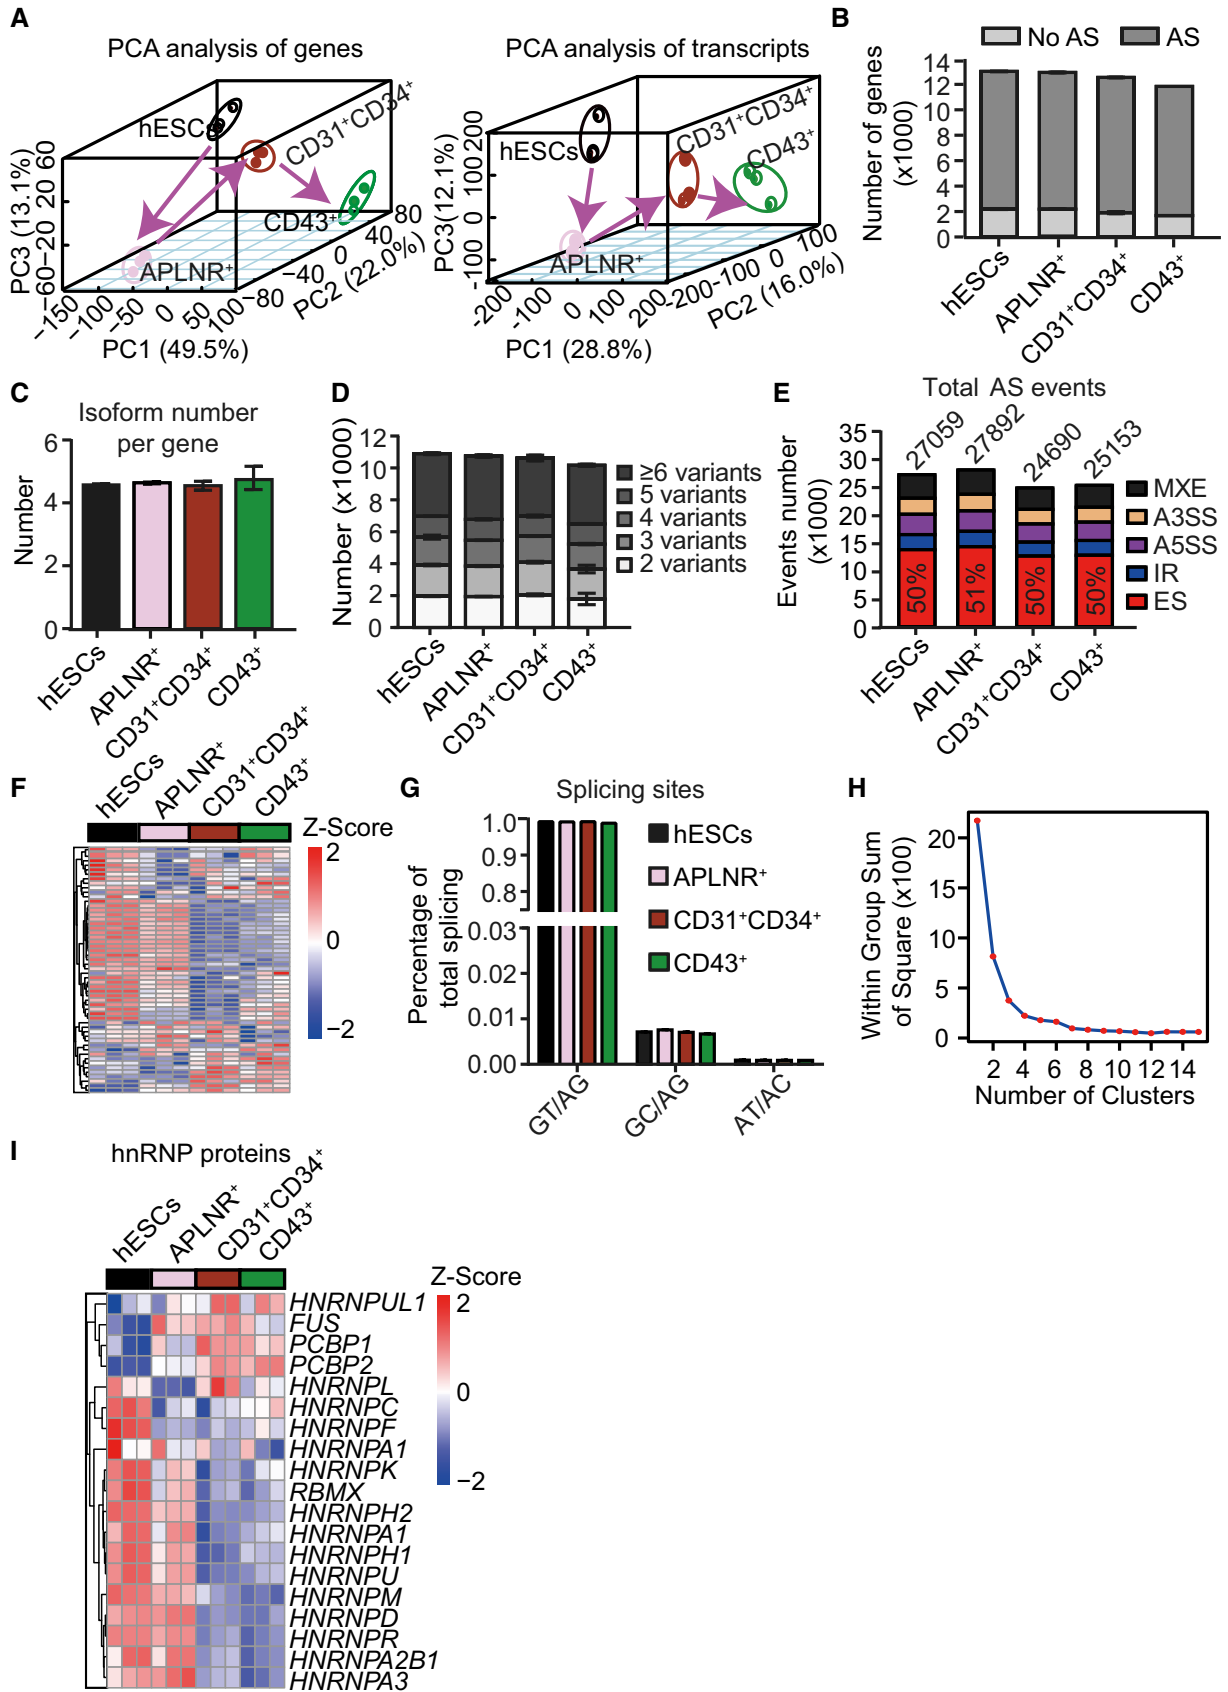

Figure EV1.

**Figure EV2. Effects of long and short PLB treatment on hematopoietic differentiation.**

- A The morphological alterations of cells treated without (DMSO control) or with various amount of PLB throughout the hematopoietic differentiation. Scale bar = 20  $\mu\text{m}$ .
- B Representative FACS plots illustrating the CD43<sup>+</sup> HSPCs without or with PLB treatment at the indicated concentrations and treatment periods.
- C Representative FACS plots showing the frequency of APLNR<sup>+</sup> cells on day 2 of differentiation and CD31<sup>+</sup>CD34<sup>+</sup> EPCs on day 5 without or with PLB treatment from day 0 to 2 at the indicated concentrations.
- D The bar graph showing the percentage of APLNR<sup>+</sup> cells and CD31<sup>+</sup>CD34<sup>+</sup> EPCs of (C). Results given are mean  $\pm$  SD. *P*-values were calculated by one-way ANOVA followed by Dunnett's test. ns represents no significant difference. All experiments were conducted for at least 3 biological replicates.

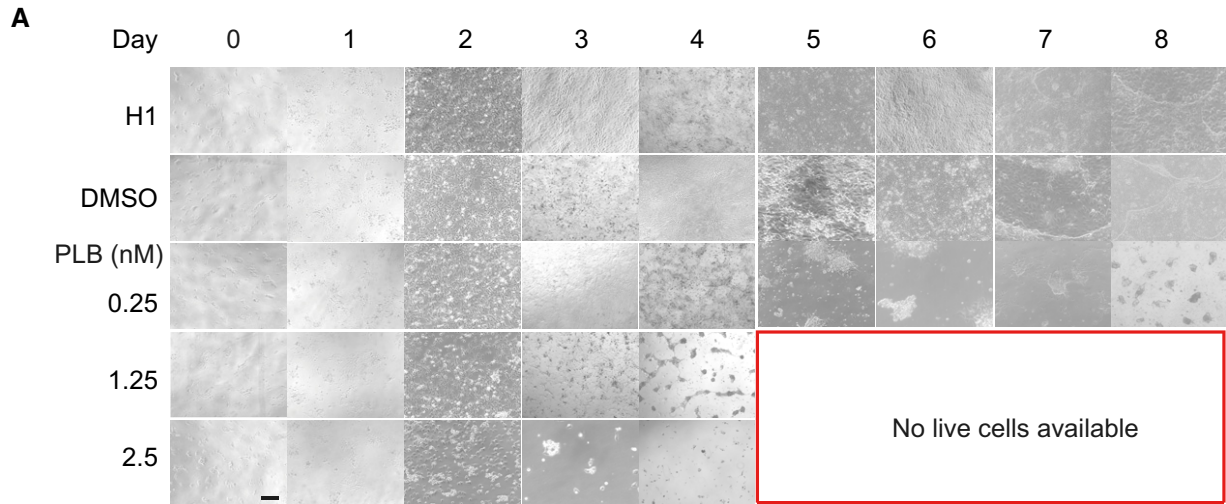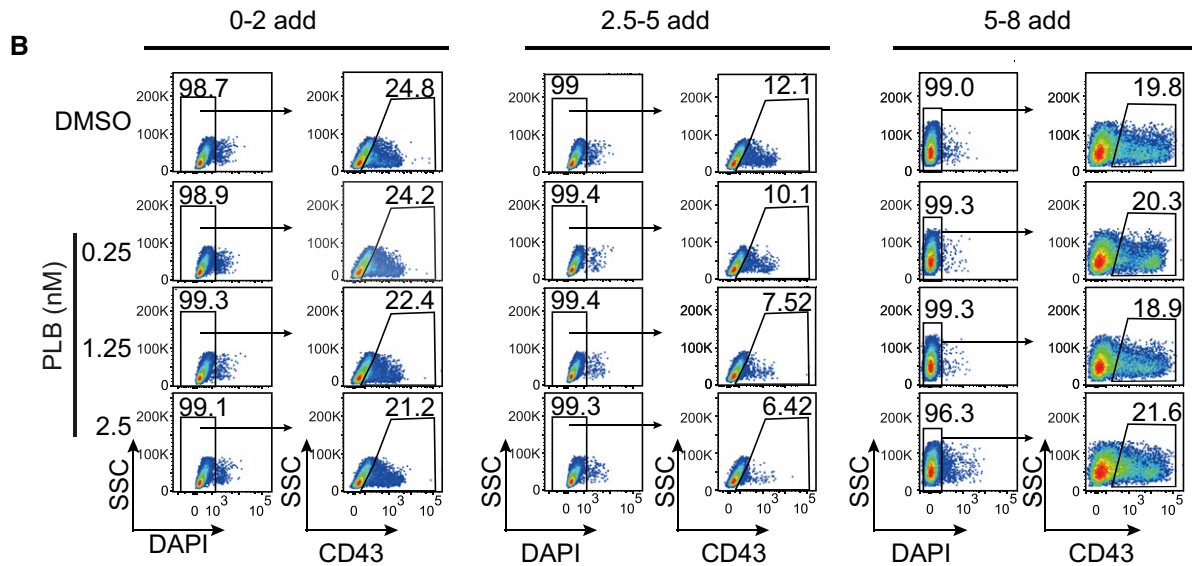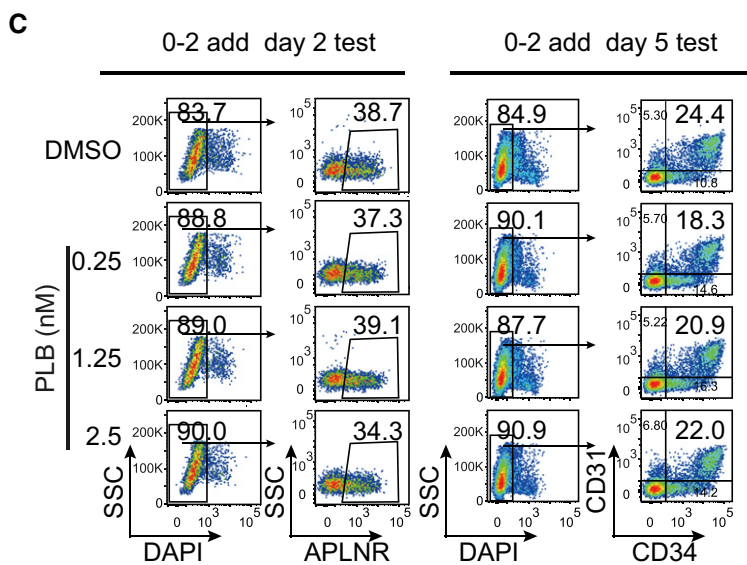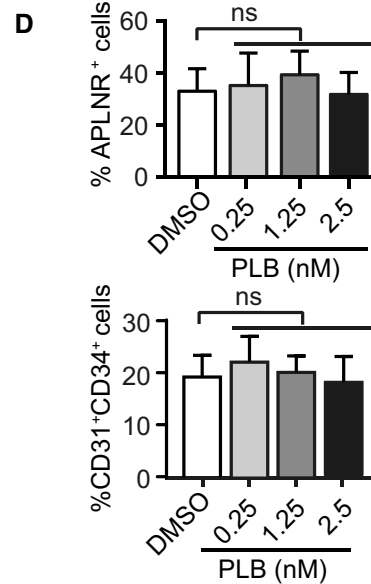

Figure EV2.

**Figure EV3. Short PLB treatment exhibits minor cytotoxic effects.**

- A Expression of *LAS1L* in day 2-differentiated APLNR<sup>+</sup> cells and day 5-differentiated CD31<sup>+</sup>CD34<sup>+</sup> cells by RNA-Seq. The bottom panel showing the inclusion/exclusion of *LAS1L* exon 9 during hematopoietic differentiation by RT-PCR.
- B The inclusion/exclusion of exon 9 of *ATP5F1C* and *HDAC7* detecting by RT-PCR during hematopoietic differentiation.
- C The top panel is a representative RT-PCR electropherogram showing the inclusion or exclusion of exon 9 in *ATP5F1C* (left) and *HDAC7* (right) in cells at days 2 and 5 without or with PLB treatment at indicated concentrations, respectively. The quantification of PSI is presented in the bottom bar graph. *P*-values were calculated by one-way followed by Dunnett's test.
- D The cellular morphology on days 3, 4, and 5 during hematopoietic differentiation after treatment with 1.25 or 2.5 nM PLB from day 2.5 to 5. Scale bar = 40 μm.
- E Cellular apoptosis assessed using Annexin V and 7-AAD at days 3 and 4 of differentiation by flow cytometry, with or without PLB treatment from day 2.5 to 5.
- F The proportion of G0/G1, S, and G2/M cells at days 3 and 4 of differentiation, with or without PLB treatment from day 2.5 to 5, respectively. The cell cycle was determined using propidium iodide staining by flow cytometry.
- G Immunofluorescent staining depicting low-density lipoprotein (AcLDL) uptake from FACS-sorted CD31<sup>+</sup> cells without (DMSO) or with PLB (1.25 nM) treatment. CD144, LDL, and DAPI were stained (upper) by red, green, and blue, respectively. Scale bar = 40 μm.
- H The bar graph showing the quantification of the LDL fluorescent intensity by the Volocity 3D image analysis software.
- I The schematic illustrating the DOX-inducible knockdown system with expression of SF3B1 shRNAs. The knockdown of SF3B1 was confirmed by RT-qPCR (left) and Western blotting (right) after inducing with DOX.
- J The representative FACS plots of CD31<sup>+</sup>CD34<sup>+</sup> EPCs after SF3B1 depletion at day 5 of differentiation.
- K The percentage of CD31<sup>+</sup>CD34<sup>+</sup> EPCs after SF3B1 depletion at day 5 of differentiation.

Data information: Results given are mean ± SD. *P*-values were determined by Student's *t*-test in (A), (E), (F), (H), (I), and (K). ns represents no significant difference.

\**P* < 0.05, \*\**P* < 0.01, \*\*\**P* < 0.001. All experiments were conducted for at least 3 biological replicates.

Source data are available online for this figure.

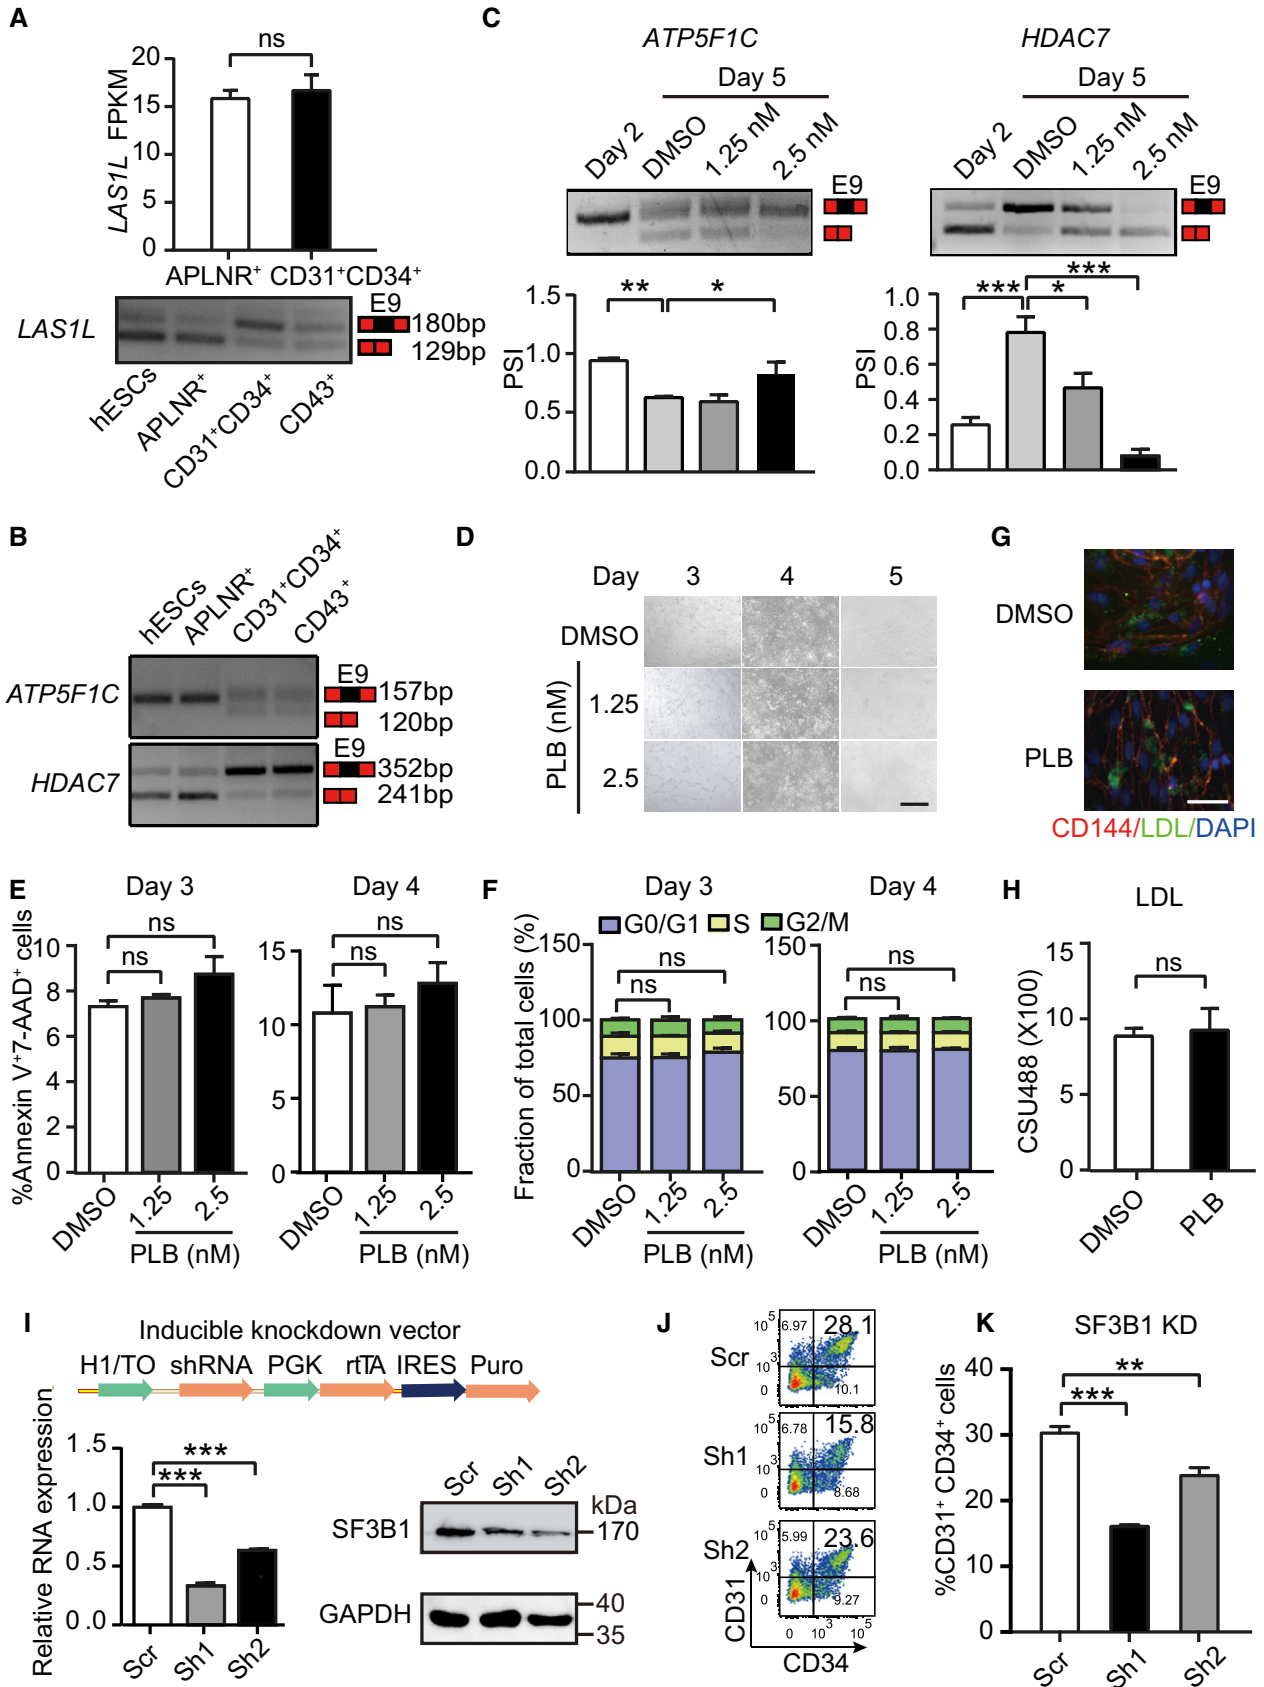

Figure EV3.

**Figure EV4. Effects of ectopic expression of constitutive splicing factors on human hematopoietic differentiation.**

- A Volcano plot shows the differential splicing events regulated by PLB treated from day 2.5 to 5. The dotted line denotes  $FDR = 0.05$ .
- B, C The scatter plot showing the correlation of splicing factors from Fig 3c (B) and all expressed genes (C) between day 2-APLNR<sup>+</sup> cells and day 5-PLB-treated cells.  $r$  refers to the correlation coefficient.
- D The protein–protein interaction network of 38 intersected splicing factors (Fig 3D) (STRING: <https://string-db.org/>).
- E The mRNA expression of *SF3A3*, *SNRPD1*, and *SNRPE* in day 2-APLNR<sup>+</sup> cells, day 5-DMSO-treated, and day 5-PLB-treated cells.  $N = 2$  technical replicates.
- F The upper panel illustrates the DOX-inducible overexpression system. Western blotting confirmed the SRSF2 overexpression upon DOX induction with anti-FLAG antibody. GAPDH was used as the loading control.
- G RT–qPCR assay of the relative mRNA expression of *SF3A3*, *SNRPD1*, and *SNRPE* after overexpression upon DOX induction. The *ACTB* gene was used as a control. Data were normalized to the mRNA level of empty vector controls cells.
- H Western blotting showing the protein expression of *SF3A3*, *SNRPD1*, and *SNRPE* after overexpression with anti-FLAG antibody. The GAPDH gene was used as a control.
- I Representative FACS plots of CD31<sup>+</sup>CD34<sup>+</sup> cells in *SF3A3*, *SNRPD1*, and *SNRPE* overexpressed (GFP<sup>+</sup>) cells.
- J Statistical analysis of the frequency of CD31<sup>+</sup>CD34<sup>+</sup> in *SF3A3*, *SNRPD1*, and *SNRPE* overexpressed (GFP<sup>+</sup>) cells.

Data information:  $P$ -values were calculated by one-way ANOVA followed by Dunnett's test. ns represents no significant difference. Results given are mean  $\pm$  SD. All experiments were conducted for at least 3 biological replicates unless stated otherwise

Source data are available online for this figure.

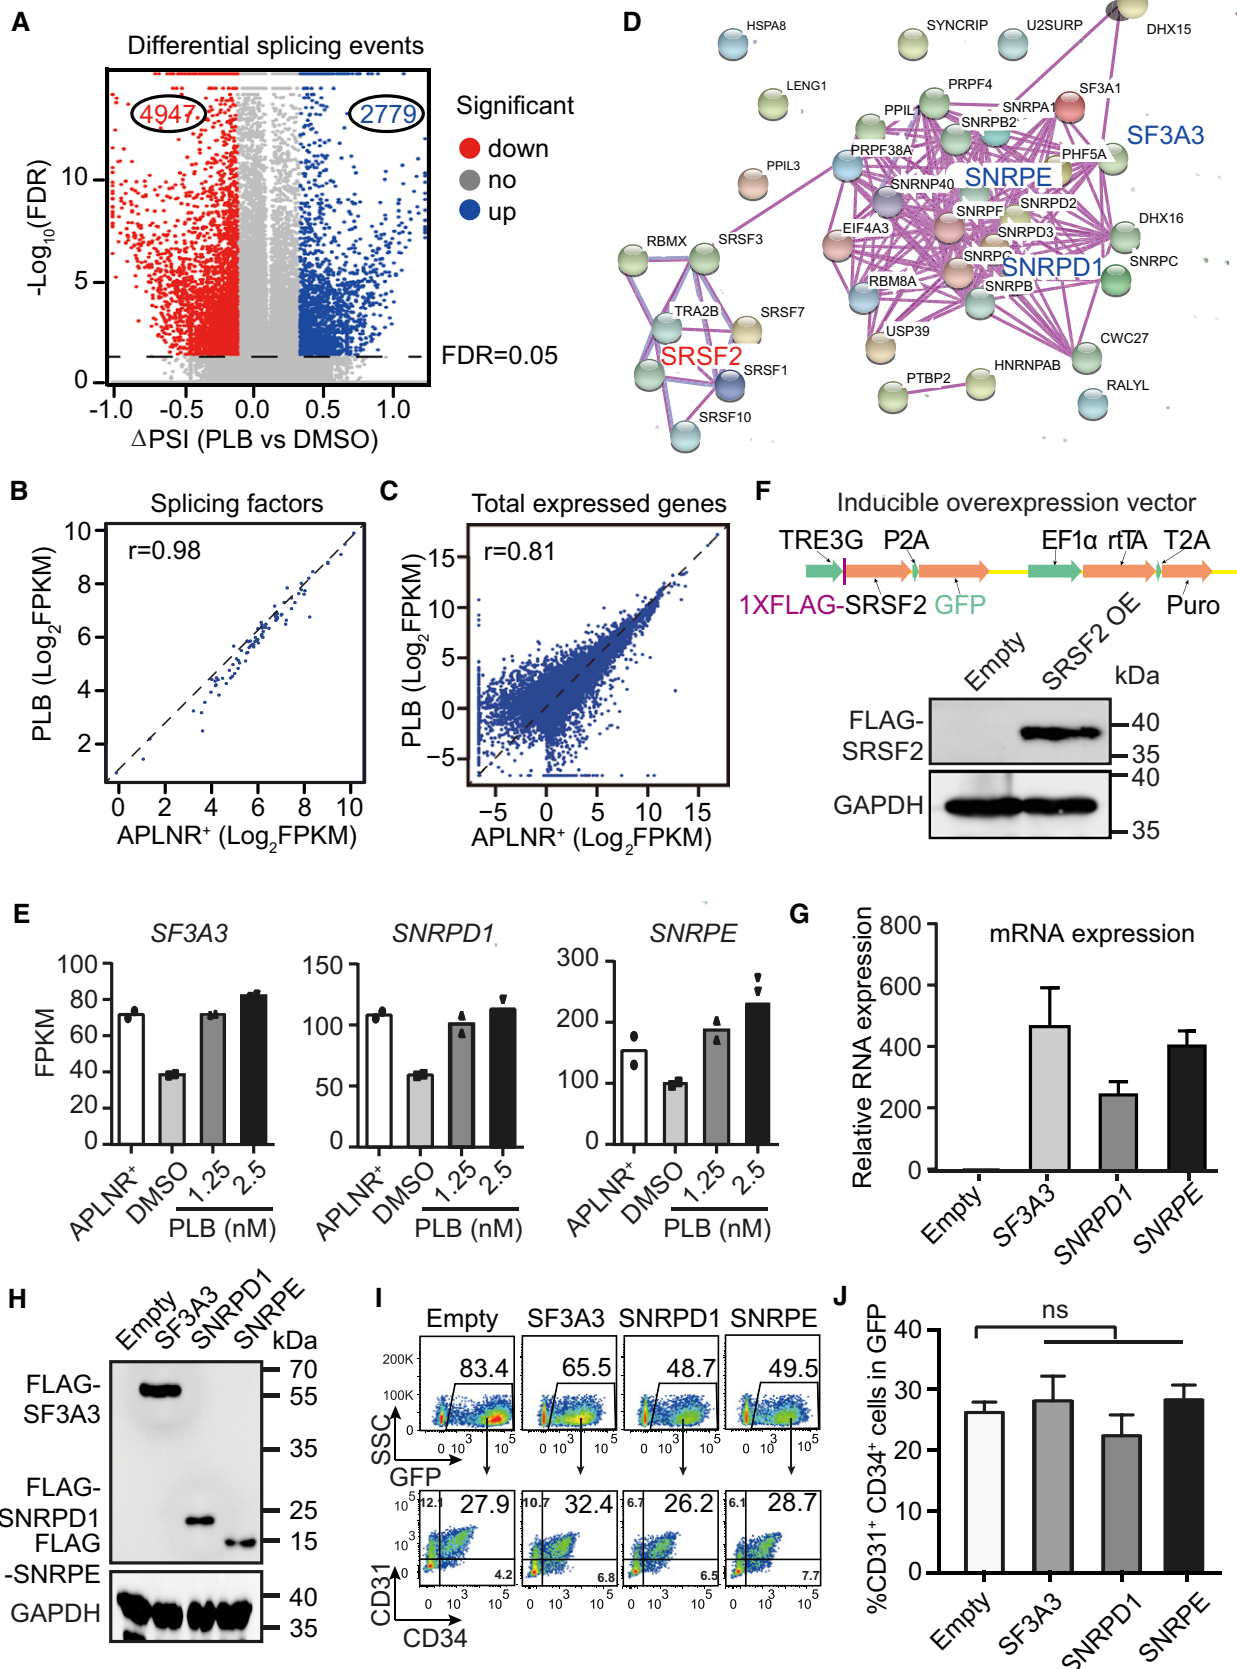

Figure EV4.



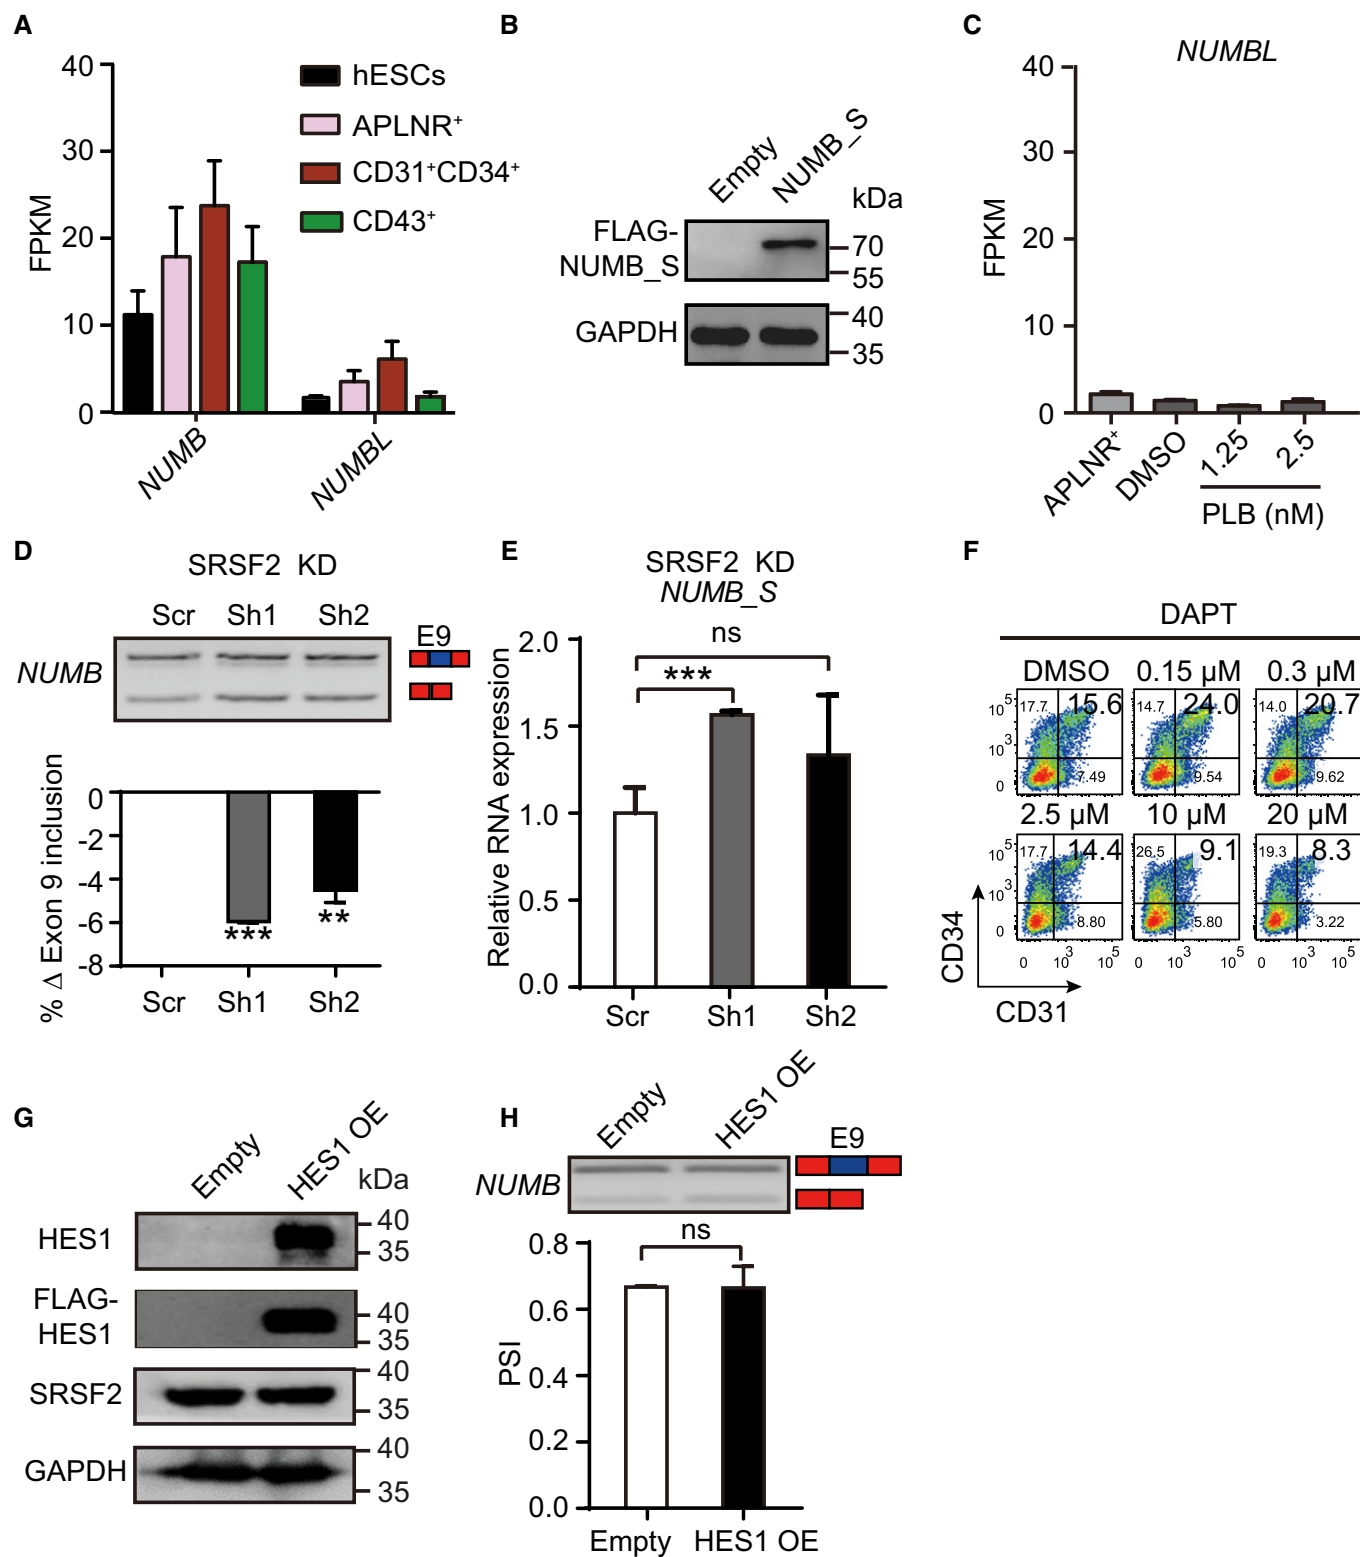

Figure EV5.

**Figure EV5. NUMB Expression and its splicing regulation.**

- A Expression of *NUMB* and its family member *NUMBLIKE* (*NUMBL*) during human hematopoietic development by RNA-Seq.
- B Western blotting showing *NUMB-S* overexpression upon DOX induction with anti-FLAG antibody. The GAPDH gene was used as a loading control.
- C Expression of *NUMBL* in day 2-APLNR<sup>+</sup> cells, day 5-DMSO-treated, and day 5-PLB-treated cells.
- D The upper panel is a representative RT-PCR electropherogram showing the inclusion or exclusion of *NUMB* exon 9 in SRSF2 depleted cells on day 5 of differentiation. The bar graph showing the changes of exon 9 inclusion obtained from the RT-PCR electropherogram.
- E RT-qPCR measuring the expression of *NUMB-S* in SRSF2 depleted cells on day 5 of differentiation.
- F The representative FACS plots of CD31<sup>+</sup>CD34<sup>+</sup> cells at day 5 of differentiation after treatment with DMSO and NOTCH inhibitor DAPT at various concentrations from day 2.5 to 5.
- G Western blotting showing the expression of HES1 (detected by endogenous HES1 antibody as well as anti-FLAG antibody) and SRSF2 in 293T cells. GAPDH acts as a loading control.
- H The splicing of *NUMB* exon 9 after HES1 overexpression. The top panel is a representative RT-PCR electropherogram showing the inclusion or exclusion of *NUMB* exon 9 without or with HES1 overexpression. The quantification is presented in the bottom bar graph.

Data information: Results given are mean  $\pm$  SD. *P*-values were determined by unpaired two-tailed Student's *t*-test in (D), (E), and (H). ns represents no significant difference. \*\**P* < 0.01, \*\*\**P* < 0.001. All experiments were conducted for at least 3 biological replicates.

Source data are available online for this figure.
