# Supplementary material for: A splicing factor switch controls hematopoietic lineage specification of pluripotent stem cells
Source: PubMed Central journal article supplement — EMBO Rep. 2020 Dec 15;22(1):e50535. doi: 10.15252/embr.202050535 (PMC7788460; doi:10.15252/embr.202050535), 2020-12-15
Supplement: EMBR-22-e50535-s009.pdf [file EMBR-22-e50535-s009.pdf]

# A splicing factor switch controls hematopoietic lineage specification of pluripotent stem cells

Yapu Li, Ding Wang, Hongtao Wang, Xin Huang, Yuqi Wen, Bingrui Wang, Changlu Xu, Jie Gao, Jinhua Liu, Jingyuan Tong, Mengge Wang, Pei Su, Sirui Ren, Feng Ma, Hong-Dong Li, Emery H. Bresnick, Jiayi Zhou, and Lihong Shi

DOI: [10.15252/embr.202050535](https://doi.org/10.15252/embr.202050535)

Corresponding author(s): Lihong Shi ([shilihongxys@ihcams.ac.cn](mailto:shilihongxys@ihcams.ac.cn)), Jiayi Zhou ([zhoujx@ihcams.ac.cn](mailto:zhoujx@ihcams.ac.cn))

---

## Review Timeline:

|                     |             |
|---------------------|-------------|
| Submission Date:    | 31st Mar 20 |
| Editorial Decision: | 13th May 20 |
| Revision Received:  | 12th Sep 20 |
| Editorial Decision: | 16th Oct 20 |
| Revision Received:  | 26th Oct 20 |
| Accepted:           | 12th Nov 20 |

---

Editor: Achim Breiling

## Transaction Report:

(Note: With the exception of the correction of typographical or spelling errors that could be a source of ambiguity, letters and reports are not edited. Depending on transfer agreements, referee reports obtained elsewhere may or may not be included in this compilation. Referee reports are anonymous unless the Referee chooses to sign their reports.)

Dear Dr. Shi,

Thank you for the submission of your research manuscript to EMBO reports. We have now received reports from the three referees that were asked to evaluate your study, which can be found at the end of this email.

As you will see, all referees think that the findings are of interest, but they also have several comments, concerns and suggestions, indicating that a major revision of the manuscript is necessary to allow publication in EMBO reports. As the reports are below, and I think all points need to be addressed, I will not detail them here.

Given the constructive referee comments, we would like to invite you to revise your manuscript with the understanding that all referee concerns must be addressed in the revised manuscript and/or in a detailed point-by-point response. Acceptance of your manuscript will depend on a positive outcome of a second round of review. It is EMBO reports policy to allow a single round of revision only and acceptance of the manuscript will therefore depend on the completeness of your responses included in the next, final version of the manuscript.

Revised manuscripts should be submitted within three months of a request for revision. We are aware that many laboratories cannot function at full efficiency during the current COVID-19/SARS-CoV-2 pandemic and we have therefore extended our 'scooping protection policy' to cover the period required for full revision. Please contact me to discuss the revision should you need additional time, and also if you see a paper with related content published elsewhere.

When submitting your revised manuscript, please also carefully review the instructions that follow below.

PLEASE NOTE THAT upon resubmission revised manuscripts are subjected to an initial quality control prior to exposition to re-review. Upon failure in the initial quality control, the manuscripts are sent back to the authors, which may lead to delays. Frequent reasons for such a failure are the lack of the data availability section (please see below) and the presence of statistics based on  $n=2$  (the authors are then asked to present scatter plots or provide more data points).

When submitting your revised manuscript, we will require:

- 1) a .docx formatted version of the final manuscript text (including legends for main figures, EV figures and tables), but without the figures included. Please make sure that changes are highlighted to be clearly visible. Figure legends should be compiled at the end of the manuscript text.
- 2) individual production quality figure files as .eps, .tif, .jpg (one file per figure), of main figures and EV figures. Please upload these as separate, individual files upon re-submission.

The Expanded View format, which will be displayed in the main HTML of the paper in a collapsible format, has replaced the Supplementary information. You can submit up to 5 images as Expanded View. Please follow the nomenclature Figure EV1, Figure EV2 etc. The figure legend for these should be included in the main manuscript document file in a section called Expanded View Figure Legends after the main Figure Legends section. Additional Supplementary material should be supplied as a single pdf file labeled Appendix. The Appendix should have page numbers and needs

to include a table of content on the first page (with page numbers) and legends for all content. Please follow the nomenclature Appendix Figure Sx, Appendix Table Sx etc. throughout the text, and also label the figures and tables according to this nomenclature.

For more details please refer to our guide to authors:

<http://www.embopress.org/page/journal/14693178/authorguide#manuscriptpreparation>

See also our guide for figure preparation:

[http://wol-prod-cdn.literatumonline.com/pb-assets/embosite/EMBOPress\\_Figure\\_Guidelines\\_061115-1561436025777.pdf](http://wol-prod-cdn.literatumonline.com/pb-assets/embosite/EMBOPress_Figure_Guidelines_061115-1561436025777.pdf)

3) a .docx formatted letter INCLUDING the reviewers' reports and your detailed point-by-point responses to their comments. As part of the EMBO Press transparent editorial process, the point-by-point response is part of the Review Process File (RPF), which will be published alongside your paper.

4) a complete author checklist, which you can download from our author guidelines (<https://www.embopress.org/page/journal/14693178/authorguide>). Please insert page numbers in the checklist to indicate where the requested information can be found in the manuscript. The completed author checklist will also be part of the RPF.

Please also follow our guidelines for the use of living organisms, and the respective reporting guidelines: <http://www.embopress.org/page/journal/14693178/authorguide#livingorganisms>

5) that primary datasets produced in this study (e.g. RNA-seq, ChIP-seq and array data) are deposited in an appropriate public database. This is now mandatory (like the COI statement). If no primary datasets have been deposited in any database, please state this in this section (e.g. 'No primary datasets have been generated and deposited').

See also: <http://embor.embopress.org/authorguide#datadeposition>

Please remember to provide a reviewer password if the datasets are not yet public.

The accession numbers and database should be listed in a formal "Data Availability " section (placed after Materials & Methods) that follows the model below. Please note that the Data Availability Section is restricted to new primary data that are part of this study.

# Data availability

The datasets produced in this study are available in the following databases:

- RNA-Seq data: Gene Expression Omnibus GSE46843  
(<https://www.ncbi.nlm.nih.gov/geo/query/acc.cgi?acc=GSE46843>)  
- [data type]: [name of the resource] [accession number/identifier/doi] ([URL or identifiers.org/DATABASE:ACCESSION])

\*\*\* Note - All links should resolve to a page where the data can be accessed. \*\*\*

Moreover, I have these editorial requests:

6) We strongly encourage the publication of original source data with the aim of making primary data more accessible and transparent to the reader. The source data will be published in a separate source data file online along with the accepted manuscript and will be linked to the relevant figure. If you would like to use this opportunity, please submit the source data (for example scans of entire gels or blots, data points of graphs in an excel sheet, additional images, etc.) of your key experiments together with the revised manuscript. If you want to provide source data, please include size markers for scans of entire gels, label the scans with figure and panel number, and send one PDF file per figure.

7) Our journal encourages inclusion of \*data citations in the reference list\* to directly cite datasets that were re-used and obtained from public databases. Data citations in the article text are distinct from normal bibliographical citations and should directly link to the database records from which the data can be accessed. In the main text, data citations are formatted as follows: "Data ref: Smith et al, 2001" or "Data ref: NCBI Sequence Read Archive PRJNA342805, 2017". In the Reference list, data citations must be labeled with "[DATASET]". A data reference must provide the database name, accession number/identifiers and a resolvable link to the landing page from which the data can be accessed at the end of the reference. Further instructions are available at: <http://www.embopress.org/page/journal/14693178/authorguide#referencesformat>

8) Regarding data quantification and statistics, can you please specify, where applicable, the number "n" for how many independent experiments (biological replicates) were performed, the bars and error bars (e.g. SEM, SD) and the test used to calculate p-values in the respective figure legends. Please provide statistical testing where applicable, and also add a paragraph detailing this to the methods section. See: <http://www.embopress.org/page/journal/14693178/authorguide#statisticalanalysis>

I look forward to seeing a revised version of your manuscript when it is ready. Please let me know if you have questions or comments regarding the revision.

Yours sincerely,

Achim Breiling  
Editor  
EMBO Reports

-----  
Referee #1:

This manuscript reports evidence for a SRSF2-NUMB-NOTCH regulatory axis that controls HEP specification, mediated by what the authors term a "splicing factor switch" that occurs during differentiation of HEP. The authors analyzed RNA-seq data derived from in vitro culture of a human ESC cell line to show that substantial changes in expression of spliceosomal factors as well as SR proteins occur at the to stage of HEP formation, and that changes in alternative splicing of key genes such as NUMB occur concomitantly. Interestingly, the splicing inhibitor pladienolide B (PLB) blocked HEP formation, strongly inhibited the splicing factor switch, and inhibited the switch in NUMB alternative splicing. Additional experiments showed that over-expression of SRSF2, which has predicted binding sites in the regulated NUMB exon, can prevent the skipping of exon 12 needed for formation of NUMB-S, at the same time substantially rescuing the differentiation of HEP cells. Impressively, over-expression of NUMB-S also rescues HEP differentiation.

The role of post-transcriptional RNA processing in early hematopoiesis is clearly very important but poorly understood. These studies offer the potential for novel insights into this area. The authors report an intriguing alternative splicing switch in the NUMB gene that appears critical for HEP formation. This splicing event has been reported in other contexts and previously shown to be important in Notch signaling, but to my knowledge the demonstration of its importance in early hematopoiesis is novel. This result seems important and novel. However, in this reviewer's opinion, some of the regulatory steps proposed in this pathway are interesting but they rest heavily on correlations and lack some of the specific experimental validations needed to validate the models. They also fail to discuss other studies of NUMB splicing that are relevant to this work. The work would benefit from collaboration with an expert in alternative splicing.

1. The conclusion that a single alternative splicing switch in the NUMB gene plays a prominent role in HEP formation is rather remarkable: over-expression of NUMB-S can substantially overcome the (partial) differentiation block caused by PLB treatment (Fig. 4F, 4G). This is a very nice result. The caveat is that we don't get what the level of NUMB-S protein over-expression is - is it much higher than the normal level would be?

2. The regulation of NUMB-S splicing by SRSF2 is not definitive. The evidence is mostly based on correlations between SRSF2 expression and the balance of alternative splicing isoforms NUMB-L vs NUMB-S. The authors say there are predicted SRSF2 binding sites in exon 12, consistent with SRSF2 acting as an enhancer protein to increase exon 12 splicing and expression of NUMB -L; decrease of SRSF2 expression would then be consistent with skipping of exon 12 and expression of NUMB-S. However, predictions of splicing factor binding are imperfect and no details about the sites are provided. Proof of direct regulation by SRSF2 would require data linking SRSF2 binding to regulation, perhaps in a minigene splicing reporter model, or by CLIP-seq experiments to measure actual binding in wild type vs binding site-mutated exon 12, with accompanying splice data. Otherwise, it could well be that SRSF2 influences NUMB splicing indirectly or only weakly at endogenous levels.

3. Related to point #2, a deficiency of the paper is the lack of discussion of previous studies of NUMB splicing regulation. Other papers on NUMB splicing have identified splicing factors including SRSF1 as regulators of what appears to be the same NUMB exon (Rajendran, et al., 2016). In fact, even the authors' data in Figure 1F seems to show that down-regulation of SRSF1 correlates better with the appearance of HEP cells than SRSF2. Please discuss whether SRSF1 might be the major regulator. Also, the data for stage-specific changes in expression of SRSF2 are not consistent in Figure 1F vs 1G. In Fig. 1F, it appears that the greatest down-regulation of SRSF2 occurs in the transition from CD31+/CD34+ to CD43+, but in Fig. 1G the significant change is indicated between APLNR and CD31+/CD34+.

4. Regarding the effects of PLB: the authors present the data as if PLB is inducing a reverse splicing switch opposite to the naturally occurring switch in HEP. On p.12 they say "after the inhibition of splicing, the upregulation of SRSF2 contributed to the HEP defects". In Fig. 3B, when comparing genes differentially expressed in DMSO- vs PLB-treated cells, the differences are labeled as "PLB-UP". There may be similar language in other places. Unless I misunderstand the experiment, a more accurate interpretation might be that PLB blocks the normal differentiation-associated splicing transitions from occurring. Do the authors really think that PLB reverts the phenotype in cells that have already switched, rather than acting as an inhibitor to prevent the switches?

5. In my opinion the analysis of potential downstream effects is very preliminary, and the cause and effect relationships not firmly established. The authors described a reverse correlation between

NUMB-S and the transcription factor HES1, and suggest that HES1 might act as a downstream target of NUMB-S (p. 14). They report that HES1 over-expression severely abolished HEP formation, analogous to the effects of PLB treatment, and they suggest that NUMB-S might be a repressor of HES1 expression. This would be interesting but it seems very speculative. In fact, they report that several key components of the NOTCH signaling pathway are up-regulated during HEP formation, and that NOTCH signaling was strongly associated with differentially expressed splicing events (Fig. 5A). Can the authors rule out an entirely different cause and effect relationship, whereby changes in expression or splicing of the transcription factors is the upstream event that alters expression of SRSF2 (or SRSF1?) that ultimately regulates NUMB splicing?

6. A lot of important methodological details are missing. How did the authors identify changes in alternative splicing? Figure 3B: what cutoff values used for counting alternative splicing events? Fig. 3F: how many fold is SRSF2 over-expressed? We have no idea.

Minor issues:

1. Figure 1B is said to represent "all the expressed splicing factors". What is the list of genes included in this analysis? Is that what is shown in "Supplementary information supp 2"? This should be mentioned in the text.

2. On page 7, the authors describe a splicing factor switch in both major and minor spliceosomes. Given the fact that much of the machinery is shared between these two spliceosomes, I wonder whether it is the shared factors that switch?

3. p.8: what does it mean to say that the spliceosome is structure in an orderly manner during hematopoietic differentiation?

4. Figure 3D: the red/blue scale is confusing due to its similarity to the Z-score scales in other parts of the figures.

5. There are some grammatical and /or spelling errors that requiring careful editing. A few that I noticed are the following:

Throughput is spelled wrong in Figure 1A.

The title for Figure legend 3 needs editing.

"Neglectable" on p. 11 maybe should be "negligible"

What is "inferior" alternative splicing?

-----  
Referee #2:

The manuscript by Li et al reports on alternative splicing during human ESC hematopoietic differentiation. Alternative splicing (AS) was previously shown to affect the differentiation process of adult bone marrow hematopoietic lineages via different mechanisms, including AS of introns which controls protein translation as transcripts retaining introns do not leave the nucleus, and via generation of alternative transcription factor isoforms that drive alternative differentiation outcomes. In addition, mutations in proteins involved in the splicing process have been detected in leukemia and clonal hematopoiesis, suggesting a role in maintenance of normal hematopoiesis. A role for AS in hematopoietic development at the early embryonic stage was still largely unknown, with the exception of RUNX1 for which alternative isoforms have been linked to different

hematopoietic outcomes. Here the authors assess alternatively spliced mRNAs during human ESC differentiation into hematopoietic progenitors, analysing different stages along this pathway including APLNR+ mesoderm, CD31+CD34 hemogenic endothelial progenitor cells (HEPs) and CD43+ hematopoietic progenitor cells. They found that widespread AS occurred over the entire hematopoietic trajectory, with exon skipping most prevalent. Expression of splicing factors was reported to be reduced during differentiation of mesoderm in HEPs, with a switch in the expression of family members making up specific splicing complexes. Next they assessed the effects of inhibiting splicing during hematopoietic development using a chemical (PLB) that targets SF3B1 thus inhibiting the spliceosome. This inhibitor was found to affect the generation of HEPs in culture. This was reported to be associated with perturbation in AS and a block of the splicing factor switch. This was complemented with experiments in which splicing factors were overexpressed, which also led to a decrease in HEP generation. To assess the mechanism, they next identified alternatively spliced isoforms in the mesoderm to HEP transition that were affected by PLB treatment. One of the 26 identified was NUMB, known to play a role in cell fate decisions. NUMB switched from a long (in mesoderm) to a short isoform (in HEPs). Generation of NUMB-S was negatively affected when PLB was added to the cultures. Forced expression of NUMB-S in combination with PLB treatment rescued the HEP phenotype. As the splicing factor SRSF2 was downregulated upon differentiation from mesoderm to HEPs, it was tested whether it acts in the splicing of NUMB. Indeed it favoured generation of NUMB-L. As NUMB is a NOTCH antagonist the role of NOTCH signalling in HEP generation was assessed. The NOTCH inhibitor DAPT showed a dose-related effect on HEP generation suggesting that NOTCH levels need to be within a tightly controlled range (which is well known, e.g. work of the Bigas and Medvinsky labs). Assessing downstream NOTCH signalling genes, there appeared to be a negative correlation between NUMB-S and HES1 and when HES1 was overexpressed, no HEPs were generated. The authors concluded that the NUMB-S isoform controls the strength of NOTCH signalling, possibly by repressing HES1. In summary, the manuscript starts with a general profiling of AS in human hematopoietic differentiation, shows there is a switch of splicing factors during this process and narrowed down on the role for one of the underlying alternatively spliced genes, NUMB a NOTCH antagonist to providing an additional example of an alternatively spliced gene affecting embryonic hematopoiesis, in addition to RUNX1.

#### General comments:

The experimental strategy and design is not consistently well-described and the statistical analysis is not always clearly explained: none of the graphs show the number of samples used in each comparison and this information is not always stated in the figure legend; the t-test might not always be the right choice; and the description of the analysis performed is not always sufficient (or present at all). This should be addressed.

#### Specific comments:

1. Fig 1A: CD31+CD34+ is not a phenotype specific for hemogenic endothelium in human in vitro differentiation. CD31+CD34+ cells include both vascular and hemogenic endothelium. CD73 could have been used to separate these populations (e.g. Ditadi et al., Nat Cell Biology 2015). This does not undermine the effect described in this population in the rest of the paper, but HEP is possibly not the right term to define these cells.

2. Fig 1C - RNA-seq heatmap of splicing factors: How were clusters determined? The two clusters do not match up with the displayed dendrogram. The dendrogram looks somewhat messed up, as the highest branch is overlapping with another branch near the top. One could argue there are 4 clusters (extra group at the top and bottom). The argument for 2 clusters should be clarified, e.g. could be backed up with an elbow plot or silhouette plot.

3. It is stated that there was a cytotoxic effect of PLB when used throughout the differentiation process (8 days, data not shown), but no effect when used only at 2-3 days intervals (Fig 2A). The authors should include the data on PLB cytotoxicity in the supplementary figure. It is also important to show viability staining on the experiments in Fig 2 to support that there are no problems with cytotoxicity with shorter PLB incubations. This would affect the conclusions of the manuscript.
4. Fig 2D-E relating to apoptosis and cell cycle analysis with PLB spliceosome inhibition, showing PLB specifically effects HEP production: Assays were performed at day 5, which is at the end of the PLB sensitive period of differentiation. Could this be too late, and sensitive cells at this point have died out? Earlier time points could be beneficial. This might also help to understand whether the consequence of PLB spliceosome inhibition is the activation of a specific cell-death program in HEP or the abrogation of mesoderm to HEP differentiation; Either way, is this affecting vascular and hemogenic endothelium in the same way (see minor points for comment on phenotypic identification of HEPs)? Is it specific for hemogenic endothelium? (in this regard, could the remaining CD31+CD34+ cells represent one of the two populations in fig. 2C?). Finally FACS plots should be included, to show gating strategy.
5. Fig S2D - a quantification of the LDL uptake experiment is needed to support the conclusion.
6. Fig 2F - the experimental strategy is not clearly explained. Is the APLNR to HEP differentiation performed while inhibiting the spliceosome with PLB (as suggested by the schematic) or there is an inhibition step first, followed by differentiation (as suggested in the main text)?
7. Fig 3A - experimental strategy not clearly explained: What are the cells sorted and collected? Are the cells FACS-sorted at day 5? If so, what is their phenotype? Are they HEP cells or are they stuck to APLNR+ stage?
8. Fig 3C - Heatmap of splicing factors showing HEP + PLB shows similar profile to APLNR+. It would be nice to see this as scatter plot and correlation of expression values. Does PLB treatment correlate with APLNR+ genome wide, or only at splicing factors?
9. Fig 3F - Inducible SRSF2 schematic does not show FLAG. Presumably it does, otherwise the western is referring to a different construct. Were stable transfected lines generated? This is not clearly explained neither in the main text nor in the methods. If not, how were the cells overexpressing SRSF2 selected? If Puromycin was used for selection, why do only a fraction of cells express GFP (in Fig.4F). If GFP was used to identify the overexpressing population, please provide the frequency of GFP+ cells analysed in supplementary figure 3 (and in all the overexpression experiments based on the same system).
10. Fig 3F and S3C-G - only one out of four factors (SRSF2) recapitulates the decreased HEP generation, which is in agreement with its significant and exclusive upregulation in response to PLB treatment. This seems a little light to conclude that "In summary, the disturbed splicing as a result of the impediment of the splicing factor switch leads to impaired HEP formation"?
11. Fig 4F - FACS gates showing SSC vs GFP, then CD34 CD31... Intended to show NUMB\_S induction recovers phenotype caused by PLB. However, as the GFP intensity of the NUMB-S vector is weaker than the empty vector, the SSC vs GFP gate does not capture the same population, and is enriched for higher GFP levels. This could bias the result. On the basis of what were the gates set? FMOs should be shown in the supplementary. Axis of the dotplots should be better labelled with fluorescent intensities.



12. Fig 5C-D - This is already known and published (including the use of DAPT, Uenishi et al., Nat Communications 2018) and should be acknowledged in the main text.

13. The conclusion that "NUMB-S controls the precise strength of NOTCH signalling and the HEP differentiation process, potentially by repressing HES1 expression" needs the addition that the conclusion is based exclusively on the observation of the two factors independently. But there is no evidence supporting a direct or indirect effect of NUMB-S on HES1. The model in Fig 5J suggests otherwise and should be adapted.

Minor points:

Fig 1H: "No changed genes" is somewhat confusing; "Number of changed genes" would be clearer.

Fig 2A and 2C - units of measurement are missing on the quantification of flow cytometry experiments (frequencies of ...? Absolute number?)

Fig 3D - not clear what labels refer to what Venn circles

Fig 4C - Sashimi plot: Needs a y axis scale to allow comparison of relative transcript levels. Also needs exons labelled

-----  
Referee #3:

In this manuscript, the authors investigate the role of post-transcriptional RNA processing in hematopoietic development using a hPSC-based model. The authors apply a combination of wet lab approaches and bioinformatics analysis to identify novel players linked to the differentiation of mesodermal cells to hemogenic endothelial progenitor cells. Their investigation led to the identification of a widespread mechanism whereby a dynamic alternative splicing reprogramming occurs during hematopoietic development. They uncovered a splicing regulatory axis consisting of SRSF2-NUMB-NOTCH which seems to be an important contributor of hemogenic endothelial progenitor cells differentiation.

The manuscript is clear, concise, well written and figures are, in general, well-constructed. Furthermore, claims made by the authors are supported by the data generated from well-designed experiments. However, I feel that the manuscript could benefit from some minor clarifications/adjustments, as follows:

-The authors analysed the alternative splicing program of human hematopoietic development from ESCs and identified a splicing factor switch occurring during HEP generation (Figure 1). Have the author considered to examine the impact of alternative splicing events in splicing factors that could explain their switch in expression? In other words, is there an orchestrated AS program during differentiation that regulate splicing factors expression (eg. intron retention)?

- The authors use pladienolide B (PLB), a natural inhibitor of the spliceosome which targets SF3B1 but this compound is also cytotoxic and induced apoptosis, even at a very low dose during hematopoietic differentiation process (data not shown by the authors). Have the authors considered the use of siRNA/shRNA targeting specifically SF3B1 to corroborate the data obtained with PLB treatment?

- Could the author explain (and clarify in the text) their choice of exon 9 of LAS1L, ATP5F1C and

HDAC7 (Figure 2 and S2) as markers of splicing defect after PLB treatment? Why not including intron retention as markers of splicing defect instead of exon inclusion? Furthermore, if I interpreted the data in the figures correctly, DMSO treatment seems to have more effect (for LAS1L and HDAC7) than with the two concentration of PLB tested. Any comment from the authors on that particular point? (maybe I did misunderstand something and if that's the case I do apologise for this comment).

-In Figure 4H, the authors detected (in silico) SRSF2 binding sites within NUMB-Exon12 and tested the effect of PLB treatment or/and SRSF2 overexpression on the expression of NUMB isoforms. The treatments led to the reduction of the level of the NUMB-S transcripts (Figure 4I) and a concomitant increase of the NUMB-L transcripts (Figure. 4J). They therefore concluded that SRSF2 functions in the regulation of NUMB alternative splicing. Have the author thought of inducing the knock down of SRSF2 to see if it induces the up-regulation of NUMB-Small isoform? Furthermore, it would be really essential to confirm that SRSF2 actually binds to exon 12 (and to which binding sites) before they could claim that SRFS2 is the direct player regulating NUMB-Exon12 splicing (using mini-gene reporter or Protein-RNA pull-down assay).

**1 RESPONSE TO CRITIQUES**

2 We thank the editors and reviewers for their instructive comments and  
3 recommendations. Below, we have articulated the point-by-point responses and  
4 revisions implemented, including new experimental data that addresses each of the  
5 reviewers' comments .

6 Referee #1:

7 This manuscript reports evidence for a SRSF2-NUMB-NOTCH regulatory axis that  
8 controls HEP specification, mediated by what the authors term a "splicing factor  
9 switch" that occurs during differentiation of HEP. The authors analyzed RNA-seq data  
10 derived from in vitro culture of a human ESC cell line to show that substantial  
11 changes in expression of spliceosomal factors as well as SR proteins occur at the stage  
12 of HEP formation, and that changes in alternative splicing of key genes such as  
13 NUMB occur concomitantly. Interestingly, the splicing inhibitor pladienolide B (PLB)  
14 blocked HEP formation, strongly inhibited the splicing factor switch, and inhibited the  
15 switch in NUMB alternative splicing. Additional experiments showed that  
16 over-expression of SRSF2, which has predicted binding sites in the regulated NUMB  
17 exon, can prevent the skipping of exon 12 needed for formation of NUMB-S, at the  
18 same time substantially rescuing the differentiation of HEP cells. Impressively,  
19 over-expression of NUMB-S also rescues HEP differentiation.

20 The role of post-transcriptional RNA processing in early hematopoiesis is clearly very  
21 important but poorly understood. These studies offer the potential for novel insights  
22 into this area. The authors report an intriguing alternative splicing switch in the  
23 NUMB gene that appears critical for HEP formation. This splicing event has been  
24 reported in other contexts and previously shown to be important in Notch signaling,  
25 but to my knowledge the demonstration of its importance in early hematopoiesis is  
26 novel. This result seems important and novel. However, in this reviewer's opinion,  
27 some of the regulatory steps proposed in this pathway are interesting but they rest

28 heavily on correlations and lack some of the specific experimental validations needed  
29 to validate the models. They also fail to discuss other studies of NUMB splicing that  
30 are relevant to this work. The work would benefit from collaboration with an expert in  
31 alternative splicing.

32 **Response:**

33 Regarding the SRSF2-NUMB-NOTCH axis, we included additional data to support  
34 our proposed model. Although these details are articulated in the point-by-point  
35 responses, here is a summary of the major experimental additions:

36 1) We used minigene reporter to confirm that SRSF2 could bind and promote the  
37 generation of *NUMB\_L* isoform in response 2. This new data was incorporated as  
38 Fig. 5B-D and described on page 14, lines 343-354 (highlighted in yellow).

39 2) We overexpressed HES1 in 293T cells and found that no alteration of SRSF2  
40 expression and no alterations of *NUMB* exon 12 splicing were detected, ruling out  
41 the possibility that HES1 regulates *NUMB* splicing indirectly via modulating  
42 SRSF2 expression in response 5. This new data was incorporated as Fig. EV5G  
43 and H and described on page 16, lines 400-402 (highlighted in yellow).

44 Regarding prior work on *NUMB* splicing, we have summarized the references  
45 relevant to *NUMB* splicing in the revised discussion section on page 19, lines 463-468  
46 (highlighted in yellow).

47 Regarding the suggestion about including an expert in alternative splicing, the  
48 alternative splicing analysis in this study was supervised by Dr. Hong-Dong Li, a  
49 co-author and expert in alternative splicing.

50

51 Query 1: The conclusion that a single alternative splicing switch in the NUMB gene  
52 plays a prominent role in HEP formation is rather remarkable: over-expression of  
53 NUMB-S can substantially overcome the (partial) differentiation block caused by  
54 PLB treatment (Fig. 4F, 4G). This is a very nice result. The caveat is that we don't get  
55 what the level of NUMB-S protein over-expression is - is it much higher than the  
56 normal level would be?

57 Response 1:

58 To determine the expression level of NUMB\_S, we conducted Western blotting from  
59 the NUMB\_S stable overexpression hESC cell line (GFP<sup>+</sup>), in which NUMB\_S  
60 expression is regulated by a DOX-dependent system, as detailed in the manuscript.  
61 During day 2.5 to 5 of hematopoietic differentiation, 1 µg/ml DOX was added to  
62 induce NUMB\_S overexpression. At day 5, we FACS-sorted GFP<sup>+</sup> cells and measured  
63 NUMB\_S protein level with an anti-NUMB antibody by Western blotting (Fig. 4E).  
64 The NUMB\_S protein was overexpressed approximately 8-fold relative to NUMB  
65 detected in the cells containing the empty vector. This new data was incorporated as  
66 Fig. 4E and described on page 13, lines 320-324. The figures are also shown below.

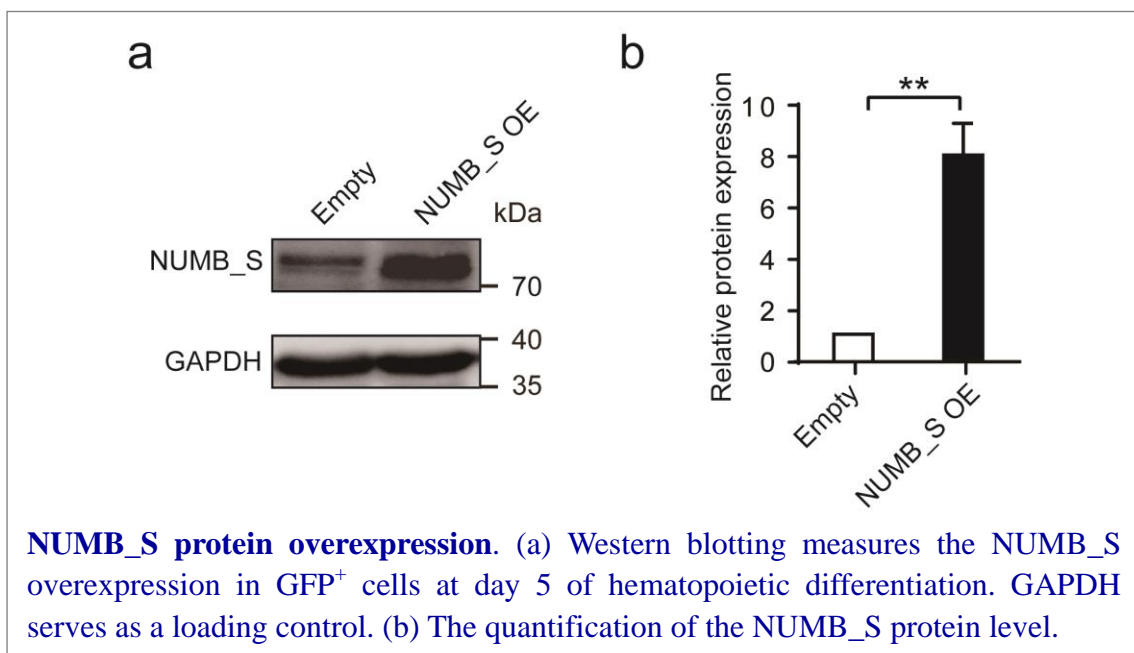

67

68 Query 2: The regulation of NUMB\_S splicing by SRSF2 is not definitive. The  
69 evidence is mostly based on correlations between SRSF2 expression and the balance  
70 of alternative splicing isoforms NUMB-L vs NUMB-S. The authors say there are  
71 predicted SRSF2 binding sites in exon 12, consistent with SRSF2 acting as an  
72 enhancer protein to increase exon 12 splicing and expression of NUMB-L; decrease  
73 of SRSF2 expression would then be consistent with skipping of exon 12 and  
74 expression of NUMB-S. However, predictions of splicing factor binding are imperfect  
75 and no details about the sites are provided. Proof of direct regulation by SRSF2 would  
76 require data linking SRSF2 binding to regulation, perhaps in a minigene splicing  
77 reporter model, or by CLIP-seq experiments to measure actual binding in wild type vs  
78 binding site-mutated exon 12, with accompanying splice data. Otherwise, it could  
79 well be that SRSF2 influences NUMB splicing indirectly or only weakly at  
80 endogenous levels.

81 Response 2:

82 As shown in the revised Fig. 5, there were two putative SRSF2 binding motifs on  
83 *NUMB* exon 12 (M1 and M2, labeled as red) by RBPmap  
84 (<http://rbpmap.technion.ac.il/>) (Fig. 5A). To further validate the potential of SRSF2 to  
85 regulate splicing of *NUMB* exon 12 via these motifs, we performed a minigene  
86 splicing reporter assay. We constructed a truncated NUMB reporter, encompassing a  
87 genomic fragment from 540 nucleotides upstream to 507 nucleotides downstream of  
88 *NUMB* exon 12. This reporter was cloned into an ExonTrap pET01 vector containing  
89 two constitutive exons, as reported previously (Rajendran *et al*, 2016). We also  
90 constructed two mutant NUMB reporters by deleting each motif ( $\Delta$ M1 or  $\Delta$ M2),  
91 respectively. After co-transfection of each NUMB reporter (WT,  $\Delta$ M1 or  $\Delta$ M2) with  
92 SRSF2 expression plasmids into 293T cells simultaneously, we found that SRSF2  
93 promoted the generation of *NUMB\_L* isoform via M1 but not M2 (Fig. 5B-D). This  
94 new data was incorporated as Fig. 5B-D and described on page 14, lines 343-354  
95 (highlighted in yellow). The figures are also shown below.

96

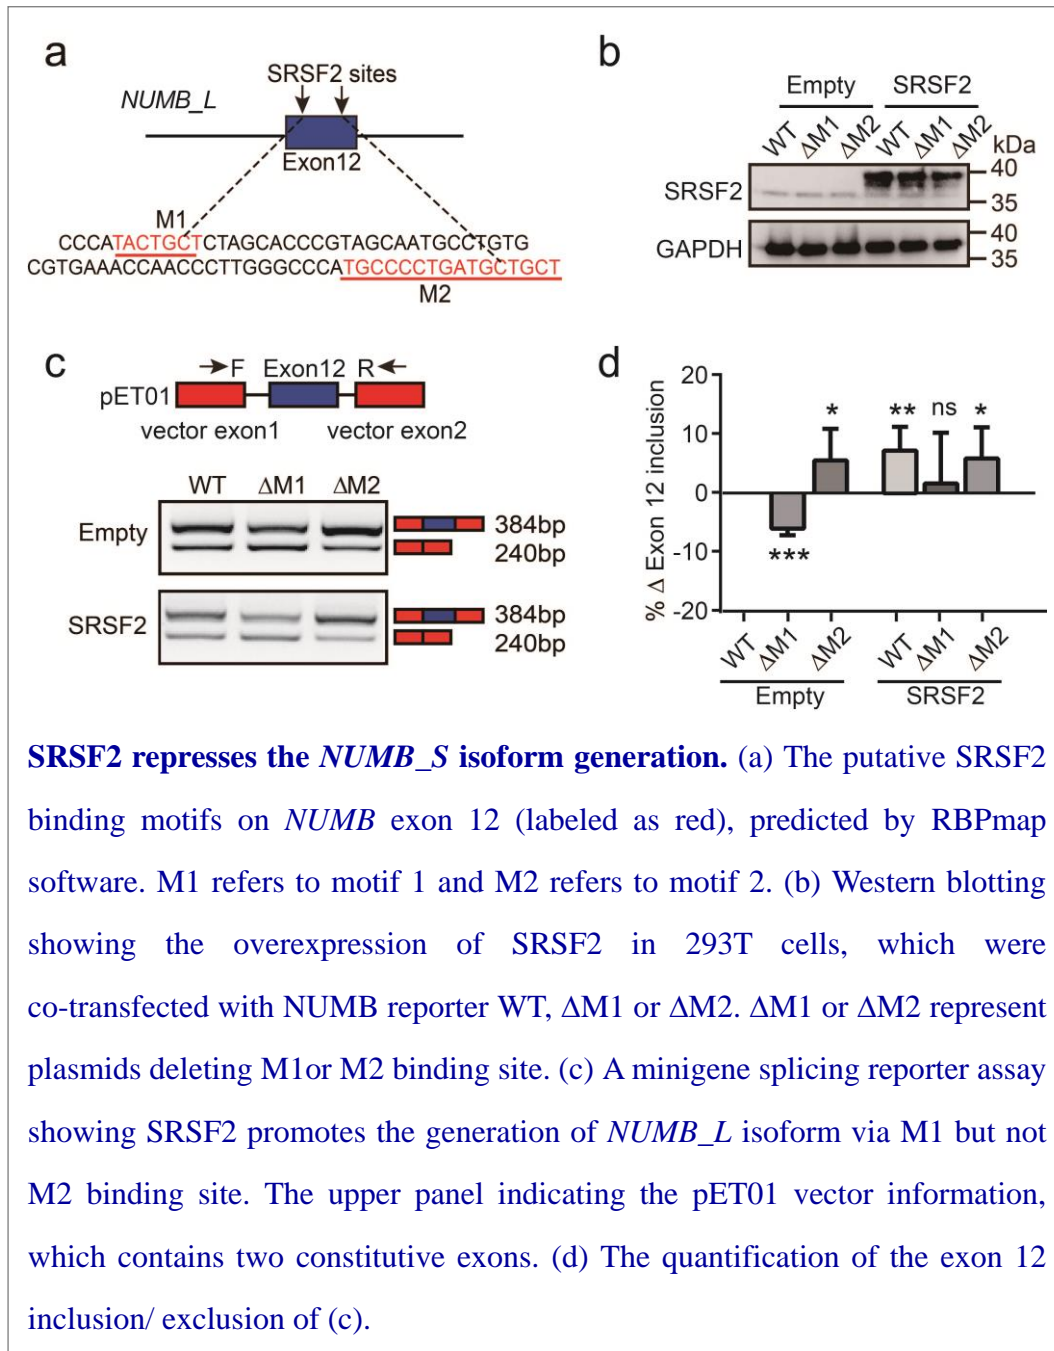

**SRSF2 represses the *NUMB\_S* isoform generation.** (a) The putative SRSF2 binding motifs on *NUMB* exon 12 (labeled as red), predicted by RBPmap software. M1 refers to motif 1 and M2 refers to motif 2. (b) Western blotting showing the overexpression of SRSF2 in 293T cells, which were co-transfected with *NUMB* reporter WT, ΔM1 or ΔM2. ΔM1 or ΔM2 represent plasmids deleting M1 or M2 binding site. (c) A minigene splicing reporter assay showing SRSF2 promotes the generation of *NUMB\_L* isoform via M1 but not M2 binding site. The upper panel indicating the pET01 vector information, which contains two constitutive exons. (d) The quantification of the exon 12 inclusion/ exclusion of (c).

97

98 Query 3: Related to point #2, a deficiency of the paper is the lack of discussion of  
 99 previous studies of *NUMB* splicing regulation. Other papers on *NUMB* splicing have  
 100 identified splicing factors including SRSF1 as regulators of what appears to be the  
 101 same *NUMB* exon (Rajendran, et al., 2016). In fact, even the authors' data in Figure

102 1F seems to show that down-regulation of SRSF1 correlates better with the  
103 appearance of HEP cells than SRSF2. Please discuss whether SRSF1 might be the  
104 major regulator. Also, the data for stage-specific changes in expression of SRSF2 are  
105 not consistent in Figure 1F vs 1G. In Fig. 1F, it appears that the greatest  
106 down-regulation of SRSF2 occurs in the transition from CD31+/CD34+ to CD43+,  
107 but in Fig. 1G the significant change is indicated between APLNR and  
108 CD31+/CD34+.

109 Response 3:

110 1) We have discussed the prior studies relevant to NUMB exon 12 splicing  
111 regulation, including SRSF1 and PTBP1(Rajendran *et al.*, 2016), SRSF3(Ke *et al.*,  
112 2018), RBM10(Bechara *et al.*, 2013), RBM4(Tarn *et al.*, 2016), RBFOX2 and  
113 SRPK2 (Lu *et al.*, 2015), etc, in the Discussion on page 19, lines 463-468  
114 (highlighted in yellow).

115 2) We agree with the reviewer that SRSF1 is also significantly downregulated during  
116 APLNR<sup>+</sup> to CD31<sup>+</sup>CD34<sup>+</sup> differentiation, which was confirmed by RT-qPCR. To  
117 address the possible role of SRSF1 on NUMB exon 12 splicing, we also predicted  
118 SRSF1 putative binding motif(s) on exon 12 (labeled as red, M; which is also the  
119 M2 of SRSF2). By applying the same minigene splicing reporter assay as  
120 demonstrated for SRSF2 (Response 2), we found that SRSF1 promoted the  
121 NUMB<sub>S</sub> isoform generation via this motif, consistent with the previous study  
122 (Rajendran *et al.*, 2016). Thus, SRSF1 promotes NUMB<sub>S</sub> generation via this  
123 motif (which we named as M2 in SRSF2 minigene assay), whereas SRSF2  
124 suppresses NUMB<sub>S</sub> via M1 motif. These results suggest that, besides SRSF2,  
125 SRSF1 is another important regulator during hematopoietic differentiation, and  
126 this merits further investigations. We incorporated the discussion on page 19, lines  
127 468-474(highlighted in yellow). The figures are shown below.



128

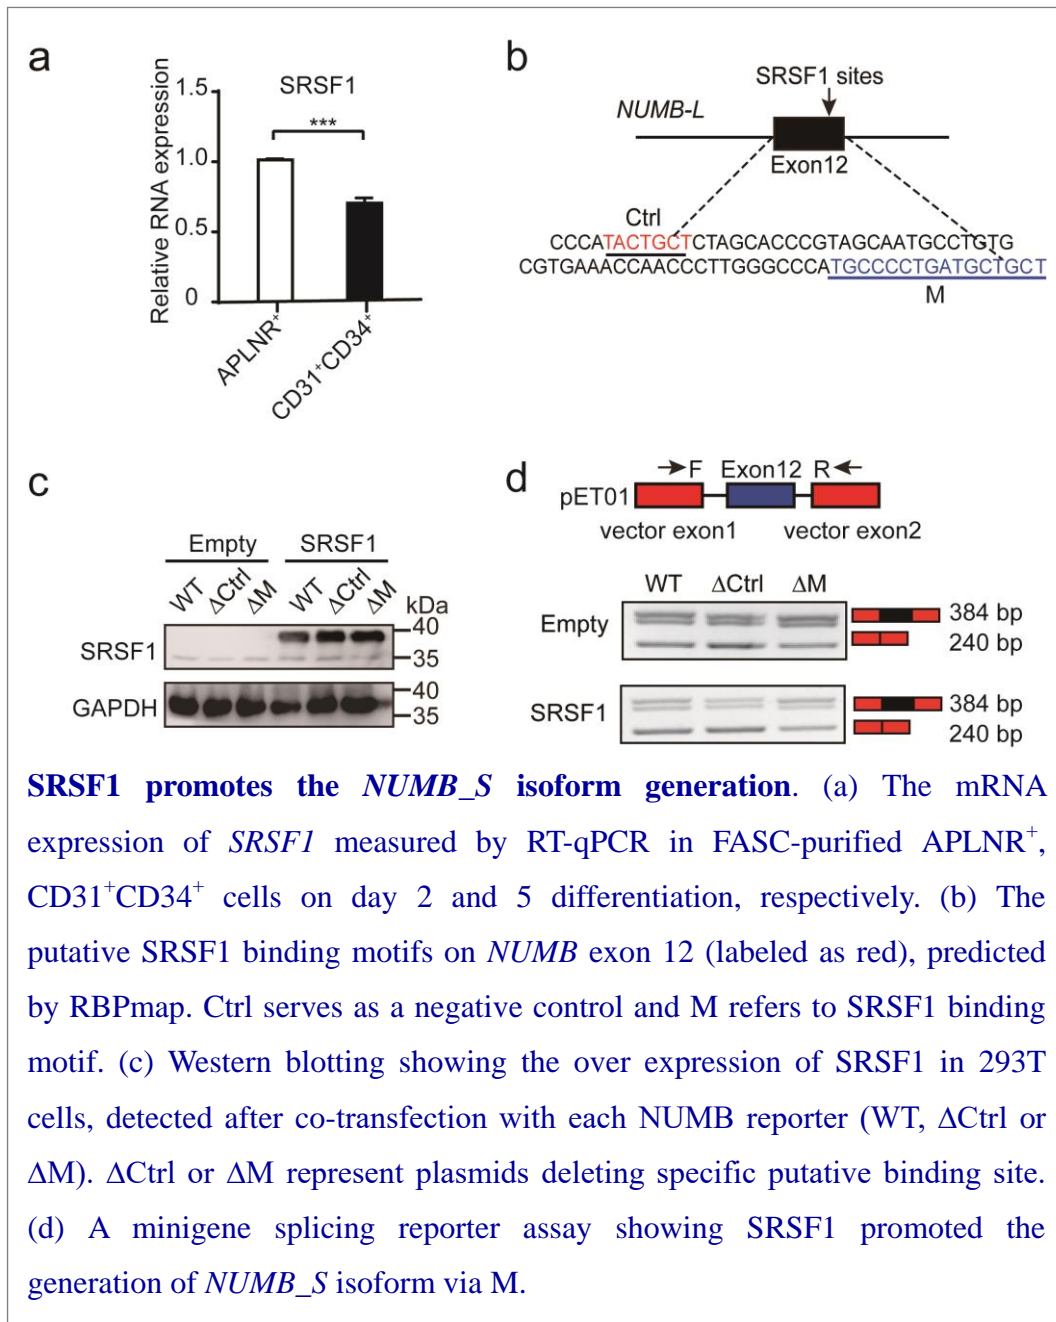

129

130 3) To illustrate the kinetics of SRSF2 during hematopoietic differentiation induced  
 131 from hESCs, we harvested hESCs on day 0 as well as FACS-purified APLNR<sup>+</sup>,  
 132 CD31<sup>+</sup>CD34<sup>+</sup>, and CD43<sup>+</sup> cells on days 2, 5 and 8, respectively, and conducted  
 133 RT-qPCR with at least 3 additional biological replicates. As shown in the updated Fig.

134 1G (n=6), we detected reduced APLNR<sup>+</sup> cell generation of CD31<sup>+</sup>CD34<sup>+</sup> cells. The  
 135 difference between the RNA-Seq and RT-qPCR might associate with distinct  
 136 normalized strategy between them. The figure is also shown below.

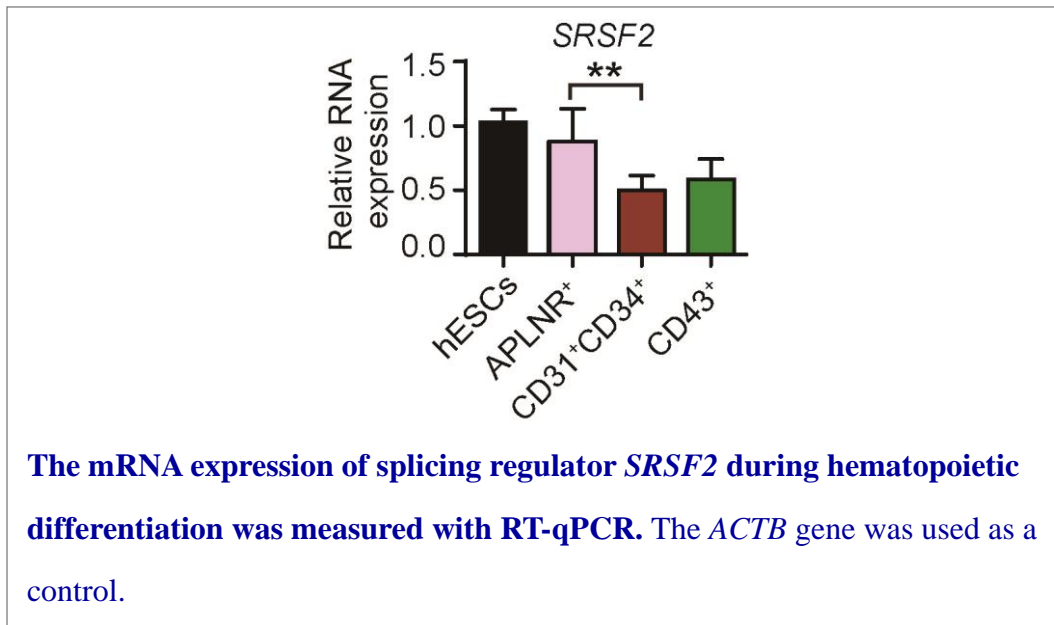

137

138 Query 4: Regarding the effects of PLB: the authors present the data as if PLB is  
 139 inducing a reverse splicing switch opposite to the naturally occurring switch in HEP.  
 140 On p.12 they say "after the inhibition of splicing, the upregulation of SRSF2  
 141 contributed to the HEP defects". In Fig. 3B, when comparing genes differentially  
 142 expressed in DMSO- vs PLB-treated cells, the differences are labeled as "PLB-UP".  
 143 There may be similar language in other places. Unless I misunderstand the experiment,  
 144 a more accurate interpretation might be that PLB blocks the normal  
 145 differentiation-associated splicing transitions from occurring. Do the authors really  
 146 think that PLB reverts the phenotype in cells that have already switched, rather than  
 147 acting as an inhibitor to prevent the switches?

148 Response 4:

149 1) Thank you for pointing this out. We agree it is likely that PLB prevents the

150 splicing factor switch. We have revised all related descriptions throughout the  
151 entire manuscript. For example, “after the inhibition of splicing, the upregulation  
152 of SRSF2 contributed to the HEP defects” has been revised as “After inhibition of  
153 splicing with PLB, we observed the decreased generation of EPC and the  
154 sustained high-level of SRSF2” on page 13, lines 336-337 (highlighted in yellow).

155 2) We changed the label “PLB-UP” to “PLB-high” (Fig. 3D)

156 Query 5: In my opinion the analysis of potential downstream effects is very  
157 preliminary, and the cause and effect relationships not firmly established. The authors  
158 described a reverse correlation between NUMB-S and the transcription factor HES1,  
159 and suggest that HES1 might act as a downstream target of NUMB-S (p. 14). They  
160 report that HES1 over-expression severely abolished HEP formation, analogous to the  
161 effects of PLB treatment, and they suggest that NUMB-S might be a repressor of  
162 HES1 expression. This would be interesting but it seems very speculative. In fact,  
163 they report that several key components of the NOTCH signaling pathway are  
164 up-regulated during HEP formation, and that NOTCH signaling was strongly  
165 associated with differentially expressed splicing events (Fig. 5A). Can the authors rule  
166 out an entirely different cause and effect relationship, whereby changes in expression  
167 or splicing of the transcription factors is the upstream event that alters expression of  
168 SRSF2 (or SRSF1?) that ultimately regulates NUMB splicing?

169 Response 5:

170 1) To strengthen the cause-and-effect relationship between SRSF2, NUMB and  
171 HES1, we tested whether SRSF2 binds and regulates NUMB exon 12 splicing  
172 with minigene reporter system (Fig. 5A-D), as indicated in response 2.

173 2) Considering that HES1 only has one protein-coding isoform (NP\_005515.1), we  
174 ruled out the possibility that changes in its splicing could be the upstream event to  
175 alter SRSF2 expression and indirectly to regulate NUMB splicing. To further

176 determine the mechanistic relationship between SRSF2 and HES1, we  
 177 overexpressed HES1 in 293T cells, and assessed SRSF2 expression upon PLB  
 178 treatment. No alteration of SRSF2 expression and no alterations of NUMB exon  
 179 12 splicing were detected (Fig. EV5G and H). This analysis provided evidence  
 180 against the possibility that HES1 regulates NUMB splicing indirectly via  
 181 modulating SRSF2 expression. This new data was incorporated as Fig. EV5G and  
 182 H and described on page 16 (highlighted in yellow), lines 400-402. The figures  
 183 are also shown below.

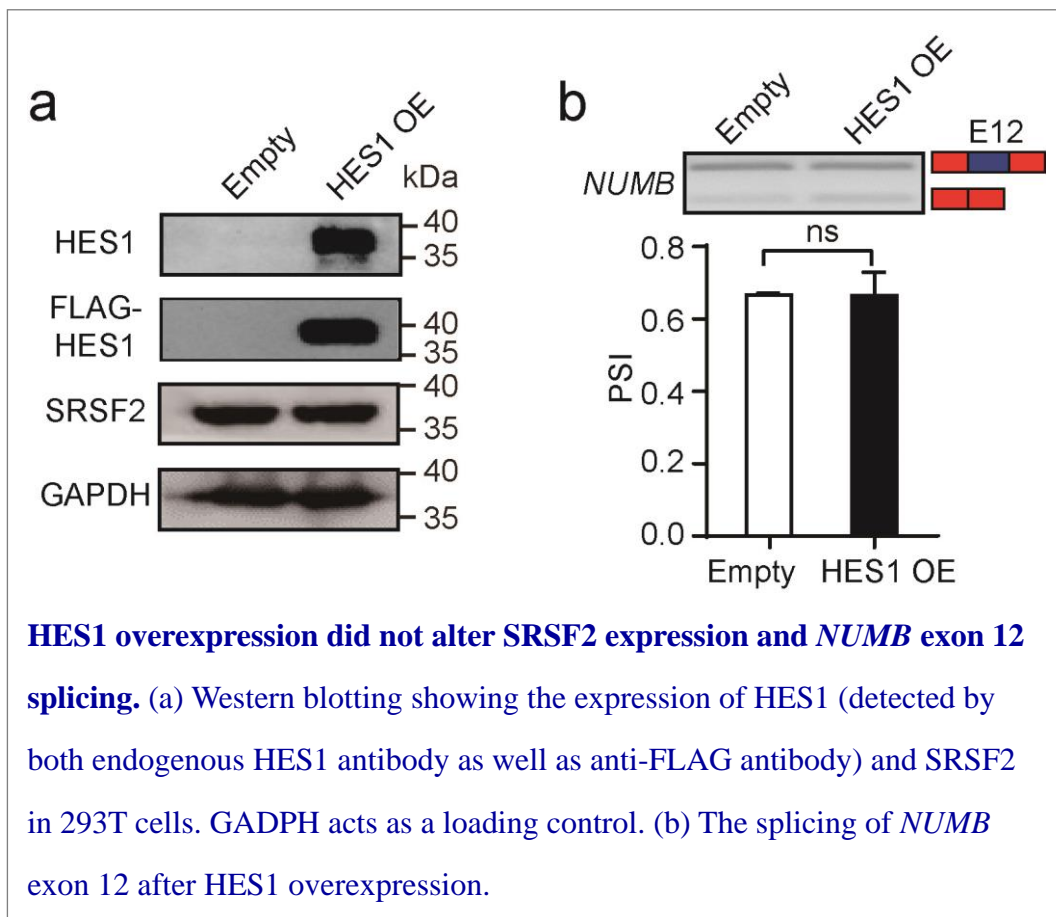

184

185 3) We did not assess the impact of other key NOTCH components on SRSF1 or  
 186 SRSF2 expression and NUMB splicing, and this may merit further investigation.

187

188 Query 6: A lot of important methodological details are missing. How did the authors  
189 identify changes in alternative splicing? Figure 3B: what cutoff values used for  
190 counting alternative splicing events? Fig. 3F: how many fold is SRSF2  
191 over-expressed? We have no idea.

192 Response 6:

193 1) We expanded the description of important methodological details and data  
194 processing. This information was incorporated into Materials and Methods on  
195 pages 21-28, lines 530-704.

196 2) To identify changes in alternative splicing, we applied rMATS (version 4.0.2)  
197 with the default setting after pairwise comparison between two consecutive  
198 differentiation stages. This is described on page 26, lines 659-662.

199 3) For Fig 3B, to identify differential splicing events, we filtered the genes with  
200 FPKM >1 in at least one differentiation stage. Among them, the cutoffs of delta  
201 PSI > 0.2 & FDR < 0.05 were used to define differentially alternative splicing  
202 events. This is described on page 10, lines 250-252 and page 44, lines 1050-1052.

203 4) To determine the expression level of SRSF2, we conducted Western blotting from  
204 the SRSF2 stable overexpression hESC cell line (GFP<sup>+</sup>), in which SRSF2  
205 expression is regulated by a DOX-dependent system, as detailed in the  
206 manuscript. During day 2.5 to 5 of hematopoietic differentiation, 1 µg/ml DOX  
207 was added to induce SRSF2 overexpression. At day 5, we FACS-sorted GFP<sup>+</sup>  
208 cells and measured SRSF2 protein level with an anti-SRSF2 antibody by Western  
209 blotting (Fig. 4E). The SRSF2 protein was overexpressed approximately 4-fold  
210 relative to SRSF2 detected in the cells containing the empty vector. This new data  
211 was incorporated as Fig. 3G and described on page 11, lines 278-280. The figures  
212 are also shown below.

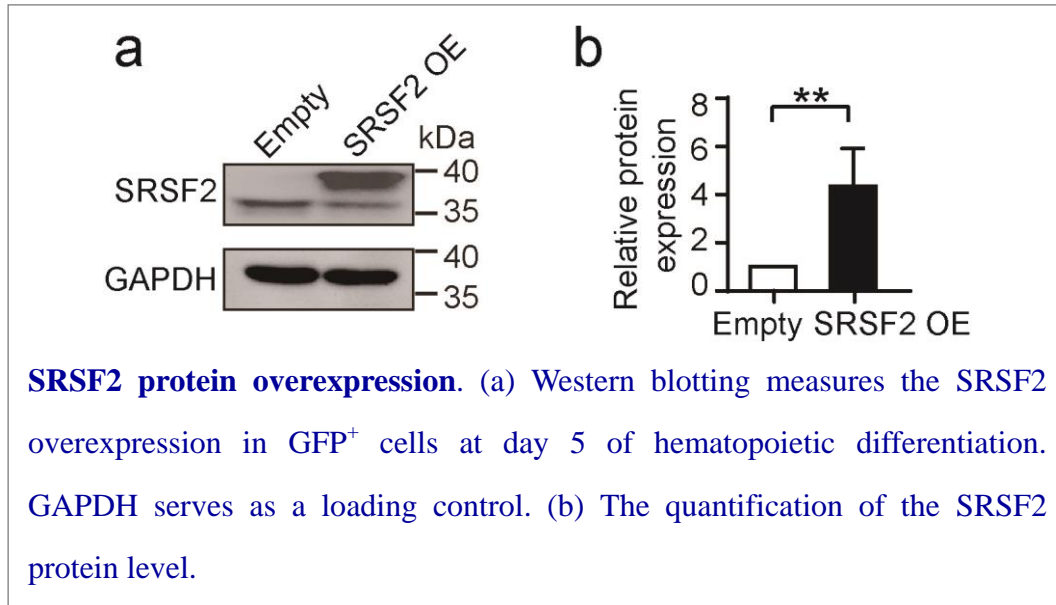

213

214 Minor issues:

215 Query 1: Figure 1B is said to represent "all the expressed splicing factors". What is  
 216 the list of genes included in this analysis? Is that what is shown in "Supplementary  
 217 information supp 2"? This should be mentioned in the text.

218 Response 1:

219 We provided the list of expressed splicing factors in the revised Table EV1.

220 Query 2: On page 7, the authors describe a splicing factor switch in both major and  
 221 minor spliceosomes. Given the fact that much of the machinery is shared between  
 222 these two spliceosomes, I wonder whether it is the shared factors that switch?

223 Response 2:

224 According to the reviewer's suggestion, we analyzed the dynamics of unique splicing  
 225 factors of major spliceosome and the common ones shared by major and minor  
 226 spliceosome. The majority of the splicing factors, including both the shared and

227 unique ones, showed the switching pattern from APLNR<sup>+</sup> to CD31<sup>+</sup>CD34<sup>+</sup> transition.

228 The figures are shown below.

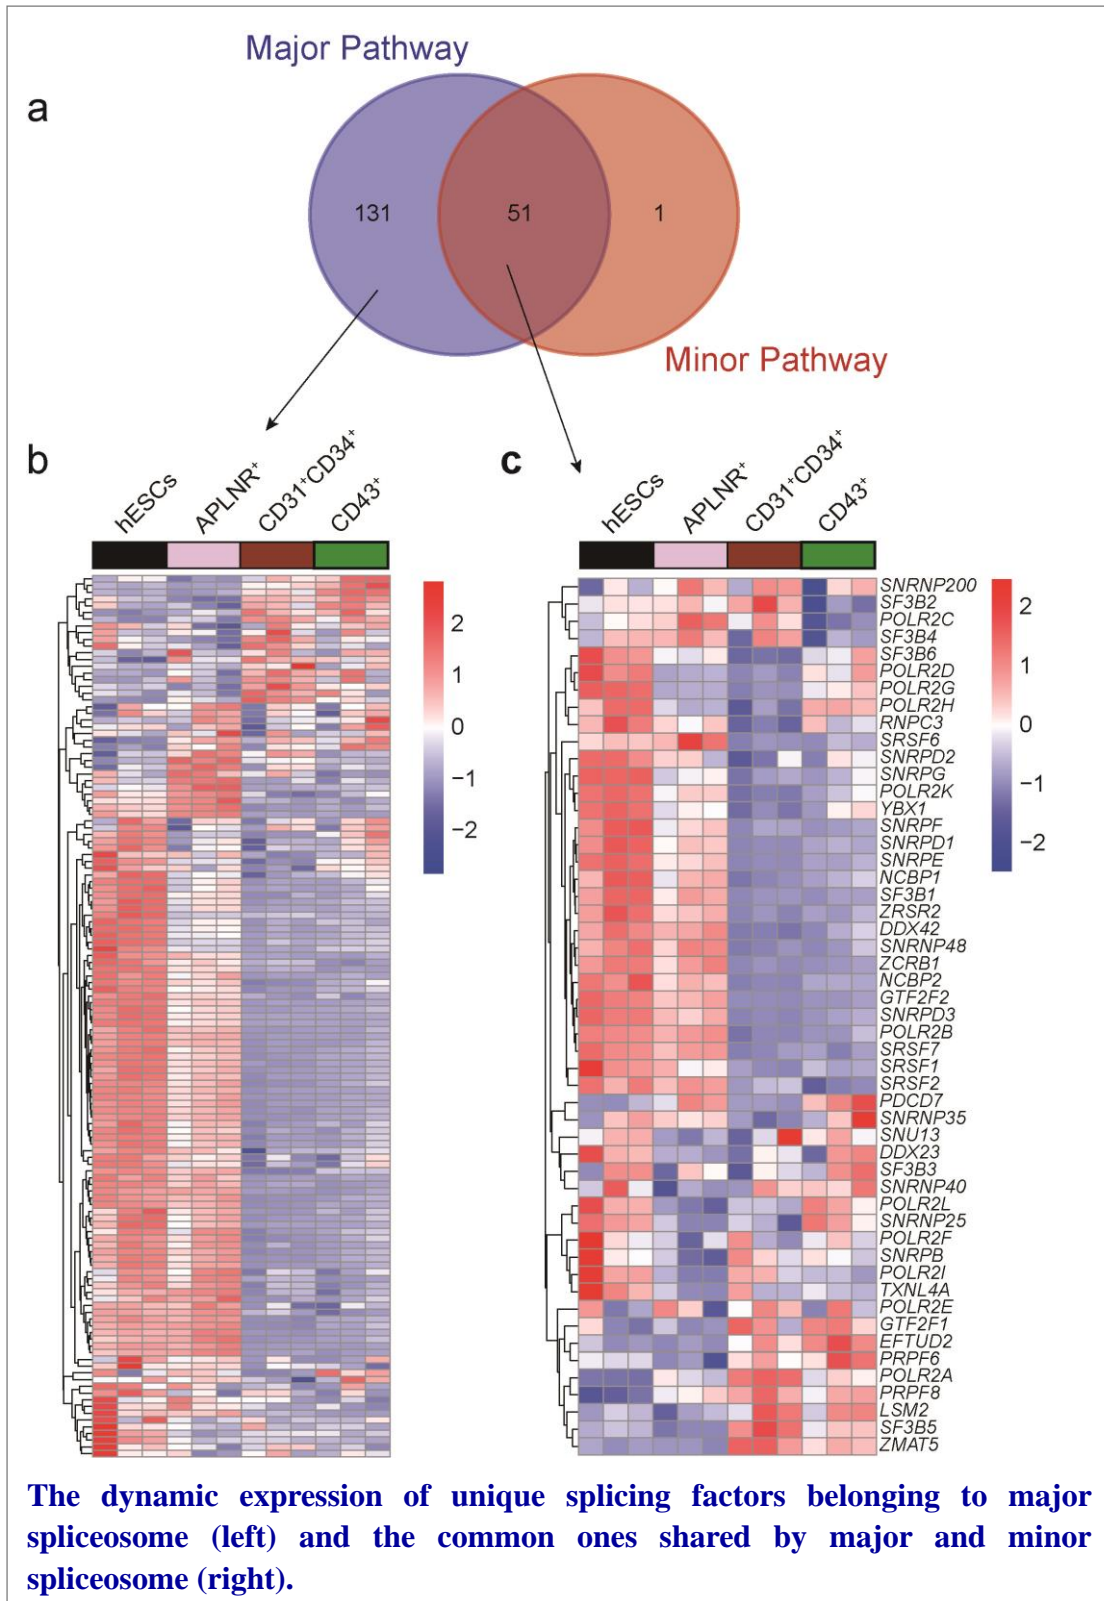

229 Query 3. p.8: what does it mean to say that the spliceosome is structure in an orderly  
230 manner during hematopoietic differentiation?

231 Response 3

232 We have deleted: “the spliceosome is structure in an orderly manner during  
233 hematopoietic differentiation” in the sentence and revised it as: “In summary, these  
234 results reveal that splicing factor expression is tightly controlled during hematopoietic  
235 differentiation”, and incorporated this statement on page 8, lines 195-196.

236 Query 4. Figure 3D: the red/blue scale is confusing due to its similarity to the Z-score  
237 scales in other parts of the figures.

238 Response 4:

239 To improve comprehension, we changed the scale to orange and purple in the updated  
240 Figure 3D. The figure is also shown below.

241

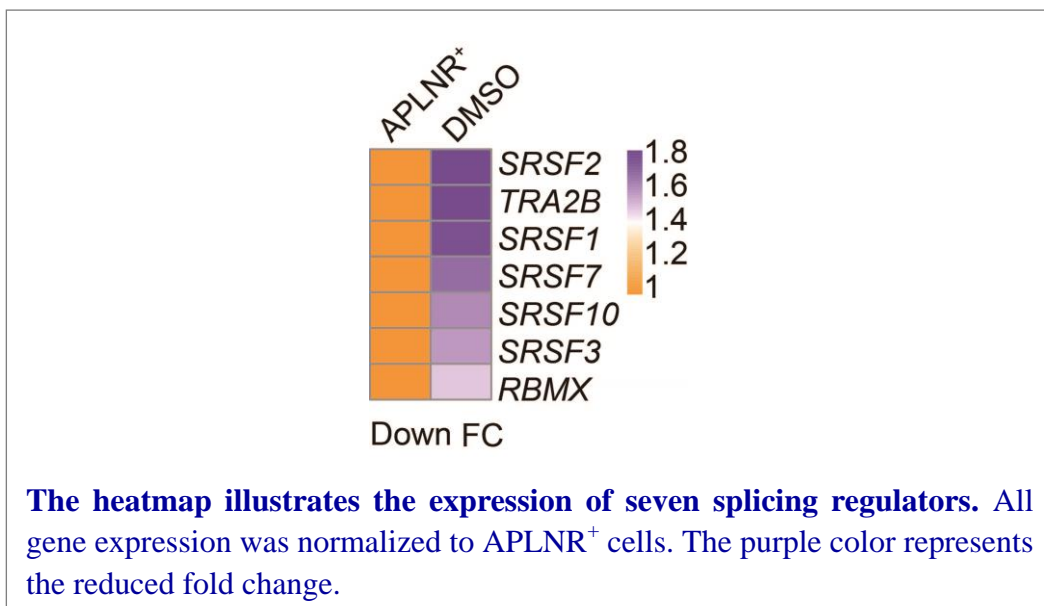

242



243 Query 5: There are some grammatical and /or spelling errors that requiring careful  
244 editing. A few that I noticed are the following:

245 Throughput is spelled wrong in Figure 1A.

246 The title for Figure legend 3 needs editing.

247 "Neglectable" on p. 11 maybe should be "negligible"

248 What is "inferior" alternative splicing?

249 Response 5:

250 We appreciate the careful review. We have gone through the manuscript and corrected  
251 spelling and optimized grammar.

252 1) We corrected “Throughput” in the updated Figure 1A.

253 2) We revised the title of Figure legend 3 to “Disruption of the splicing factor switch  
254 impacts EPC specification” on page 38, lines 1041-1042.

255 3) "Neglectable" on p. 11 was changed to "little" (page 12, line 283).

256 4) We deleted “inferior” in the revised manuscript.

257

258 Referee #2:

259

260 The manuscript by Li et al reports on alternative splicing during human ESC  
261 hematopoietic differentiation. Alternative splicing (AS) was previously shown to  
262 affect the differentiation process of adult bone marrow hematopoietic lineages via  
263 different mechanisms, including AS of introns which controls protein translation as  
264 transcripts retaining introns do not leave the nucleus, and via generation of alternative  
265 transcription factor isoforms that drive alternative differentiation outcomes. In  
266 addition, mutations in proteins involved in the splicing process have been detected in  
267 leukemia and clonal hematopoiesis, suggesting a role in maintenance of normal  
268 hematopoiesis. A role for AS in hematopoietic development at the early embryonic  
269 stage was still largely unknown, with the exception of RUNX1 for which alternative  
270 isoforms have been linked to different hematopoietic outcomes. Here the authors  
271 assess alternatively spliced mRNAs during human ESC differentiation into  
272 hematopoietic progenitors, analyzing different stages along this pathway including  
273 APLNR+ mesoderm, CD31+CD34 hemogenic endothelial progenitor cells (HEPs)  
274 and CD43+ hematopoietic progenitor cells. They found that widespread AS occurred  
275 over the entire hematopoietic trajectory, with exon skipping most prevalent.  
276 Expression of splicing factors was reported to be reduced during differentiation of  
277 mesoderm in HEPs, with a switch in the expression of family members making up  
278 specific splicing complexes. Next they assessed the effects of inhibiting splicing  
279 during hematopoietic development using a chemical (PLB) that targets SF3B1 thus  
280 inhibiting the spliceosome. This inhibitor was found to affect the generation of HEPs  
281 in culture. This was reported to be associated with perturbation in AS and a block of  
282 the splicing factor switch. This was complemented with experiments in which splicing  
283 factors were overexpressed, which also led to a decrease in HEP generation. To assess  
284 the mechanism, they next identified alternatively spliced isoforms in the mesoderm to  
285 HEP transition that were affected by PLB treatment. One of the 26 identified was  
286 NUMB, known to play a role in cell fate decisions. NUMB switched from a long (in

287 mesoderm) to a short isoform (in HEPs). Generation of NUMB-S was negatively  
288 affected when PLB was added to the cultures. Forced expression of NUMB-S in  
289 combination with PLB treatment rescued the HEP phenotype. As the slicing factor  
290 SRSF2 was downregulated upon differentiation from mesoderm to HEPs, it was  
291 tested whether its acts in the splicing of NUMB. Indeed, it favored generation of  
292 NUMB-L. As NUMB is a NOTCH antagonist the role of NOTCH signaling in HEP  
293 generation was assessed. The NOTCH inhibitor DAPT showed a dose-related effect  
294 on HEP generation suggesting that NOTCH levels need to be within a tightly  
295 controlled range (which is well known, e.g. work of the Bigas and Medvinsky labs).  
296 Assessing downstream NOTCH signaling genes, there appeared to be a negative  
297 correlation between NUMB-S and HES1 and when HES1 was overexpression, no  
298 HEPs were generated. The authors concluded that the NUMB-S isoform controls the  
299 strength of NOTCH signaling, possibly by repressing HES1. In summary, the  
300 manuscript starts with a general profiling of AS in human hematopoietic  
301 differentiation, shows there is a switch of splicing factors during this process and  
302 narrowed down on the role for one of the underlying alternatively spliced genes,  
303 NUMB a NOTCH antagonist to providing an additional example of an alternatively  
304 spliced gene affecting embryonic hematopoiesis, in addition to RUNX1.

305

306 General comments:

307 The experimental strategy and design is not consistently well-described and the  
308 statistical analysis is not always clearly explained: none of the graphs show the  
309 number of samples used in each comparison and this information is not always stated  
310 in the figure legend; the t-test might not always be the right choice; and the  
311 description of the analysis performed is not always sufficient (or present at all). This  
312 should be addressed.

313 [Response to general comments:](#)

314 [We thank the reviewer for pointing out these issues. In the revised manuscript, we](#)

315 improved the description of experiments and analyses (Materials and Methods, pages  
316 21-28, lines 530-704). Additionally, we more optimally conducted and presented the  
317 statistical analysis. P-values between two or three groups were determined by t-test,  
318 while multiple comparisons were calculated by ANOVA or the Wilcoxon signed-rank  
319 test (pages 27-28, lines 696-704). The sample numbers and statistical methods are  
320 labeled on each panel of the revised figure legends (highlighted with yellow).

321 Specific comments:

322 Query 1: Fig 1A: CD31<sup>+</sup>CD34<sup>+</sup> is not a phenotype specific for hemogenic  
323 endothelium in human in vitro differentiation. CD31<sup>+</sup>CD34<sup>+</sup> cells include both  
324 vascular and hemogenic endothelium. CD73 could have been used to separate these  
325 populations (e.g. Ditadi et al., Nat Cell Biology 2015). This does not undermine the  
326 effect described in this population in the rest of the paper, but HEP is possibly not the  
327 right term to define these cells.

328

329 Response 1:

330 We agree with the reviewer's comments. In the revised manuscript, we redefined  
331 CD31<sup>+</sup>CD34<sup>+</sup> cells as endothelial progenitor cells (EPCs). We also defined HEPs as  
332 CD31<sup>+</sup>CD34<sup>+</sup>CD73<sup>-</sup> cells (incorporated into page 6, lines 122-125) and provided the  
333 experimental data regarding the influence of PLB on HEP (CD31<sup>+</sup>CD34<sup>+</sup>CD73<sup>-</sup>)  
334 generation. This new data was incorporated into Figure 2G and discussed on page 10,  
335 lines 234-238. The figures are also shown below.

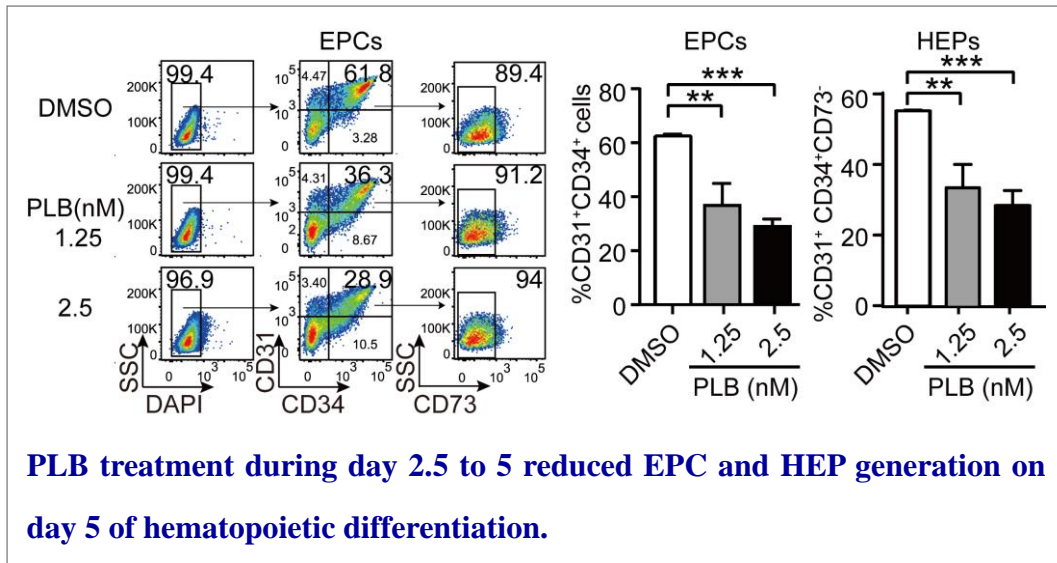

336

337 Query 2. Fig 1C - RNA-seq heatmap of splicing factors: How were clusters  
 338 determined? The two clusters do not match up with the displayed dendrogram. The  
 339 dendrogram looks somewhat messed up, as the highest branch is overlapping with  
 340 another branch near the top. One could argue there are 4 clusters (extra group at the  
 341 top and bottom). The argument for 2 clusters should be clarified, e.g. could be backed  
 342 up with an elbow plot or silhouette plot.

343 **Response 2**

344 The dendrogram was optimally presented in the updated Figure 1C. The clusters were  
 345 defined based on unsupervised hierarchical clustering with Pheatmap package (default  
 346 setting) in R, which segregated the splicing factors of the major spliceosome into two  
 347 primary clusters (Fig. 1C), in accord with the elbow analysis (Fig. EV1H). The  
 348 detailed methods are described on page 8, lines 171-174 and in Material and Methods  
 349 on page 27, lines 685-688. The figure is also shown below.

350

351

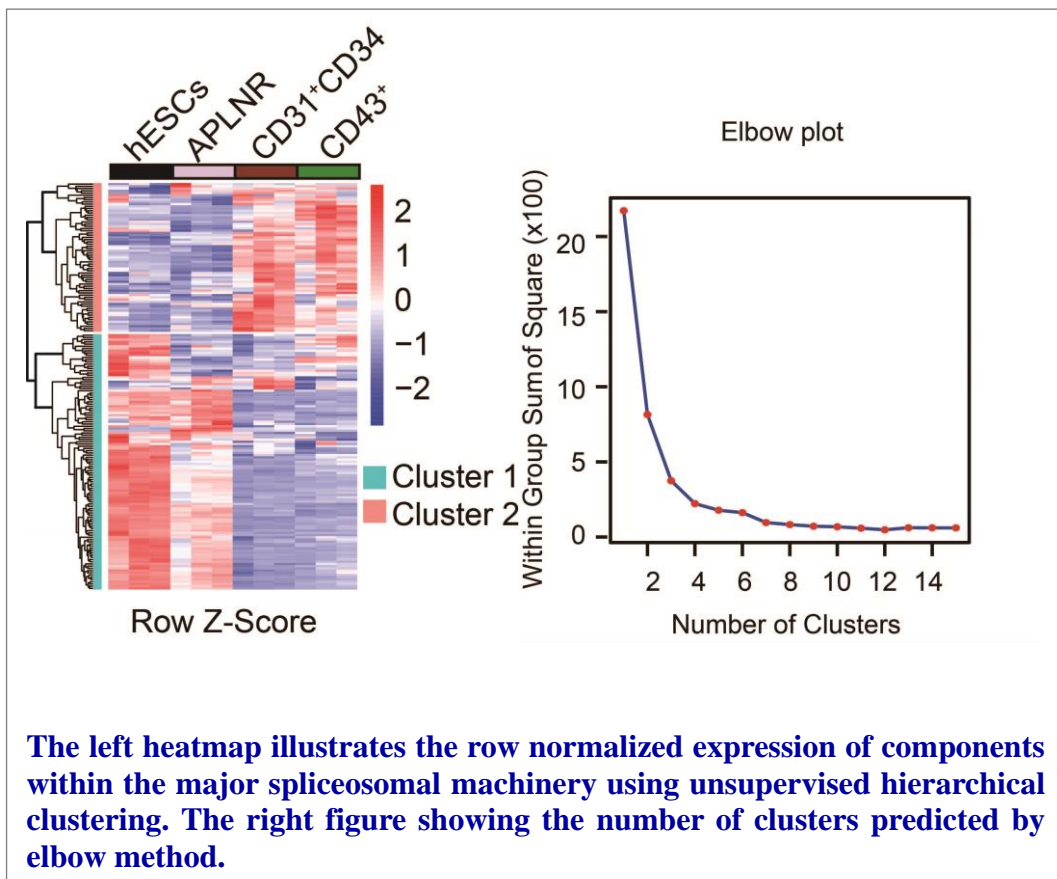

352

353 Query 3: It is stated that there was a cytotoxic effect of PLB when used  
 354 throughout the differentiation process (8 days, data not shown), but no effect when  
 355 used only at 2-3 days intervals (Fig 2A). The authors should include the data on  
 356 PLB cytotoxicity in the supplementary figure. It is also important to show  
 357 viability staining on the experiments in Fig 2 to support that there are no problems  
 358 with cytotoxicity with shorter PLB incubations. This would affect the conclusions  
 359 of the manuscript.

360 Response 3:

361 1) To investigate the cytotoxicity of PLB during hematopoietic differentiation, the  
 362 cells were treated with different concentrations of PLB (0.25, 1.25 and 2.5 nM)  
 363 throughout the differentiation process and cell morphology was analyzed from day

364 0 to 8 (Fig. EV2A). At day 5 of differentiation, we observed a large number of cell  
365 death at the higher doses of 1.25 and 2.5 nM. Even at the lower dose of 0.25 nM,  
366 starting from day 5 the cells could not differentiate with aberrant morphology.  
367 Again, this finding confirmed the cytotoxic effect of PLB throughout the  
368 differentiation process. This new data was incorporated as Fig. EV2A and  
369 discussed on page 9, lines 201-204. The figure is also shown below.

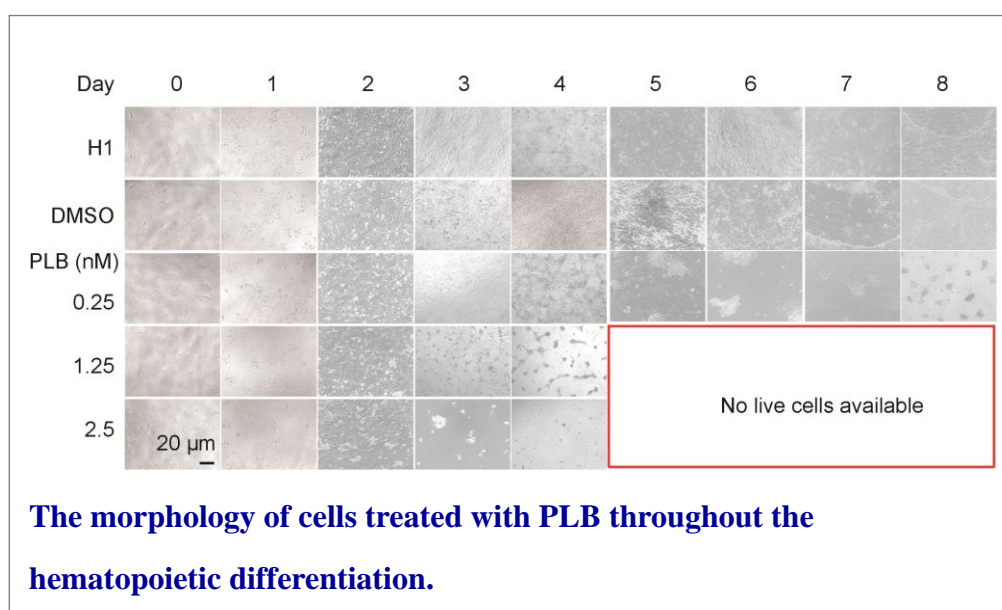

370

371 2) To assess whether a shorter PLB treatment is cytotoxic (day 2.5-5 treatment), we  
372 measured the apoptosis, cell cycle and cell morphology on days 3, 4 and 5 of  
373 differentiation. There was no detectable cytotoxicity with the shorter PLB  
374 incubation. This new data was incorporated as Fig. 2E-F and Fig. EV3D-F and  
375 discussed on page 9, lines 217-219. The figures are also shown below.

376

377

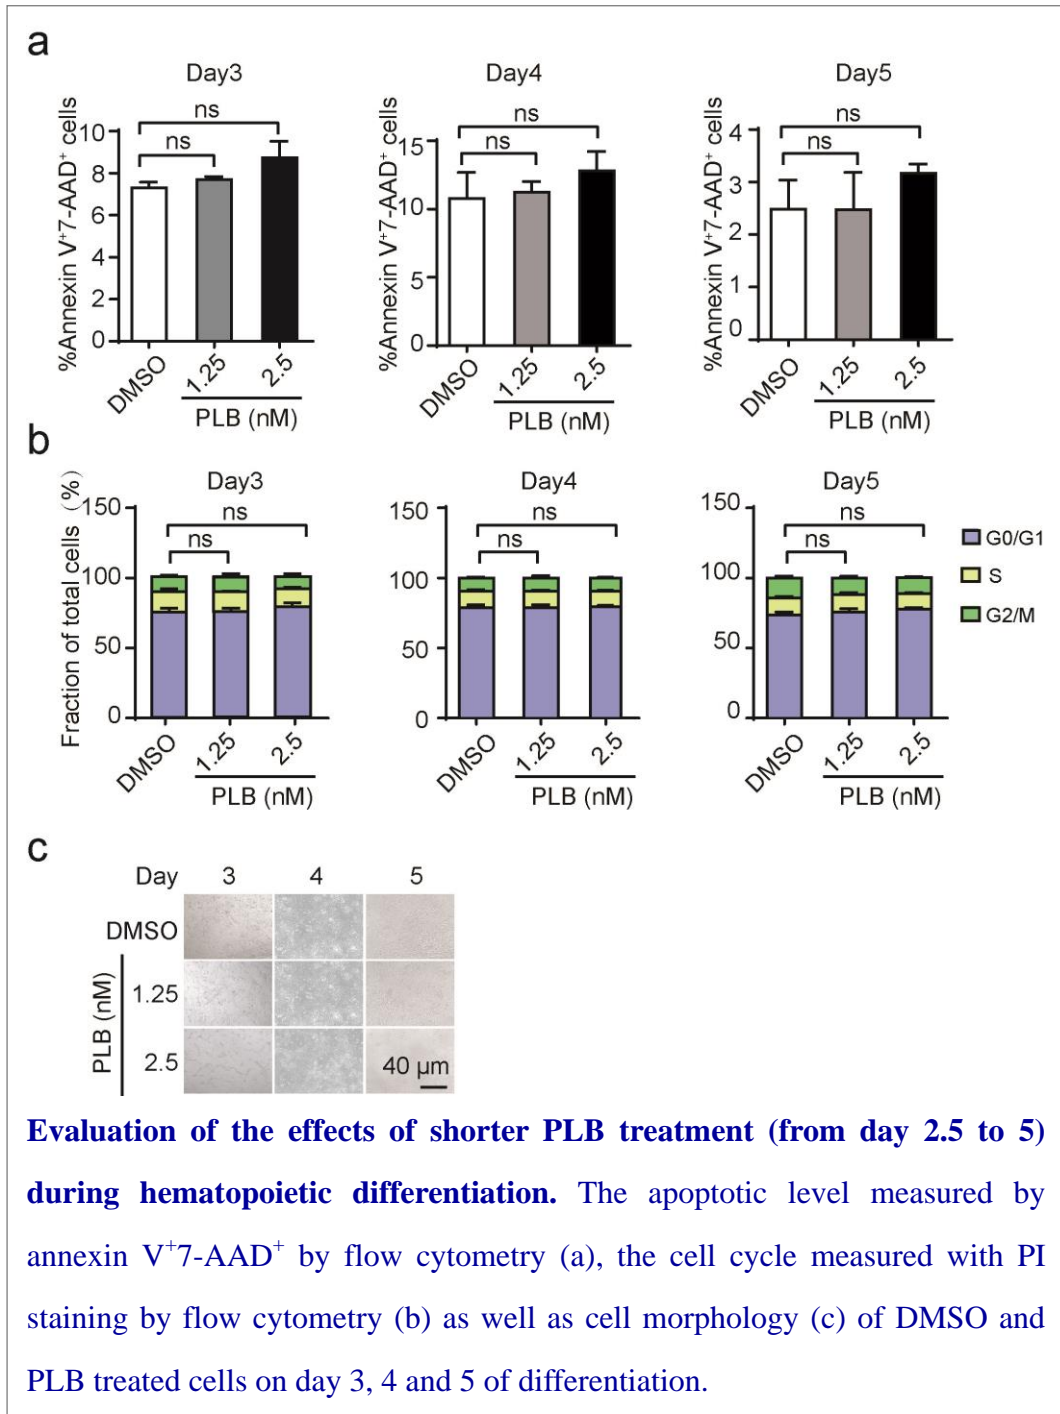

378

379 3) DAPI staining was included to monitor cell viability for all FACS analyses in this  
 380 study. We have incorporated the DAPI staining into Fig. 2C and 2G, Fig. EV2B  
 381 and 2C. In general, the cell viability > 90% in all of the FACS analyses. The



382 representative figures are also shown below.

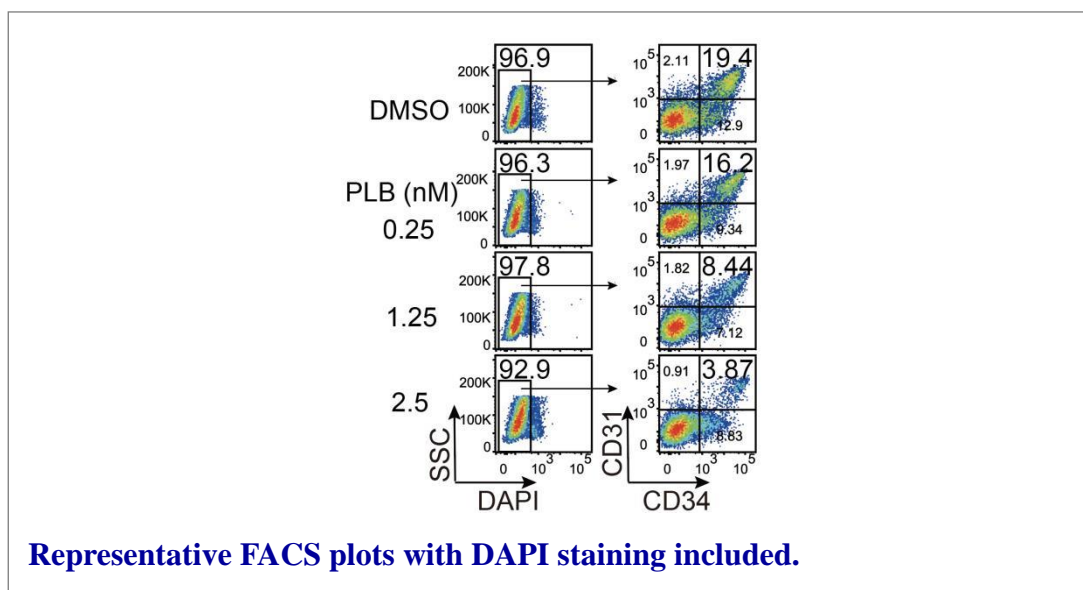

383

384 Query 4: Fig 2D-E relating to apoptosis and cell cycle analysis with PLB  
 385 spliceosome inhibition, showing PLB specifically effects HEP production: Assays  
 386 were performed at day 5, which is at the end of the PLB sensitive period of  
 387 differentiation. Could this be too late, and sensitive cells at this point have died out?  
 388 Earlier time points could be beneficial. This might also help to understand whether the  
 389 consequence of PLB spliceosome inhibition is the activation of a specific cell-death  
 390 program in HEP or the abrogation of mesoderm to HEP differentiation; Either way, is  
 391 this affecting vascular and hemogenic endothelium in the same way (see minor points  
 392 for comment on phenotypic identification of HEPs)? Is it specific for hemogenic  
 393 endothelium? (in this regard, could the remaining CD31+CD34+ cells represent one  
 394 of the two populations in fig. 2C?). Finally, FACS plots should be included, to show  
 395 gating strategy.

396 **Response 4:**

397 1) Please refer to response 3. To rule out the possibility that it is too late to test cell

398 cycle and apoptosis, we measured the apoptosis, cell cycle and cell morphology  
 399 on days 3, 4 and 5 of differentiation after PLB treatment from day 2.5 to 5 (Fig.  
 400 2E, F and Fig. EV3D, E and F). We did not detect increased apoptotic level at the  
 401 early times, and therefore PLB impairs mesoderm to HEP differentiation. This  
 402 new data was incorporated into Fig. 2E, F and Fig. EV3D, E and F and discussed  
 403 on page 9, lines 217-219.

404 2) Please refer to response 1. We tested the impact of PLB on  $CD31^+CD34^+ CD73^-$   
 405 HEPs (Fig. 2G). Similar to the  $CD31^+CD34^+$  EPCs, the generation of HEPs  
 406 decreased significantly. This new data was incorporated into Figure 2G and  
 407 discussed on page 10, lines 234-238. The figures are also shown below.

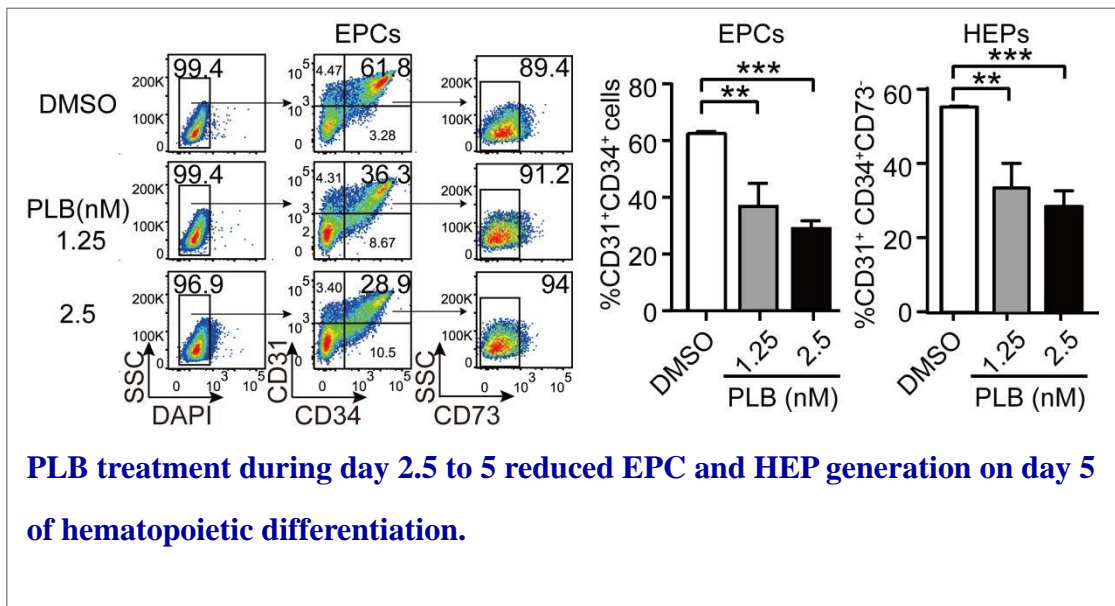

408

409 3) FACS plots with the gating strategies were incorporated into the Fig. 2C, 2G, 3H,  
 410 3K, 4F and 6H, as well as Fig. EV2B, 2C, 3J, 4I and 5F.

411 Query 5: Fig S2D - a quantification of the LDL uptake experiment is needed to  
 412 support the conclusion.

413 Response 5:

414 We quantified the LDL fluorescence intensity with Velocity 3D image  
 415 analysis software, and there was no impact of PLB on the intensity. This new data was  
 416 incorporated as Fig. EV3H and discussed on page 9, lines 219-221.

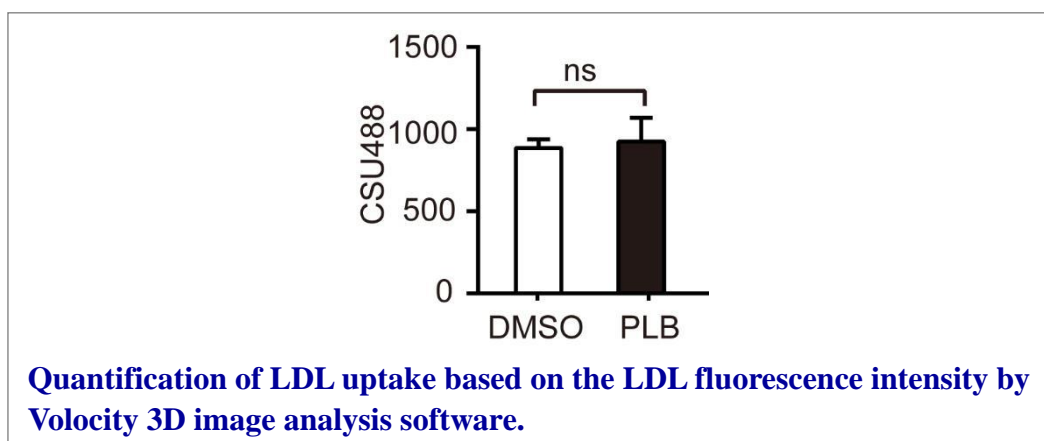

417

418 Query 6: Fig 2F - the experimental strategy is not clearly explained. Is the APLNR to  
 419 HEP differentiation performed while inhibiting the spliceosome with PLB (as  
 420 suggested by the schematic) or there is an inhibition step first, followed by  
 421 differentiation (as suggested in the main text)?

422 Response 6

423 Cells were cultured with PLB throughout the APLNR to EPC differentiation (day  
 424 2.5-5). To increase comprehension, we revised the schematic (Fig. 2G) and  
 425 incorporated the relevant text on page 10, lines 231-233. The figure is also shown  
 426 below.

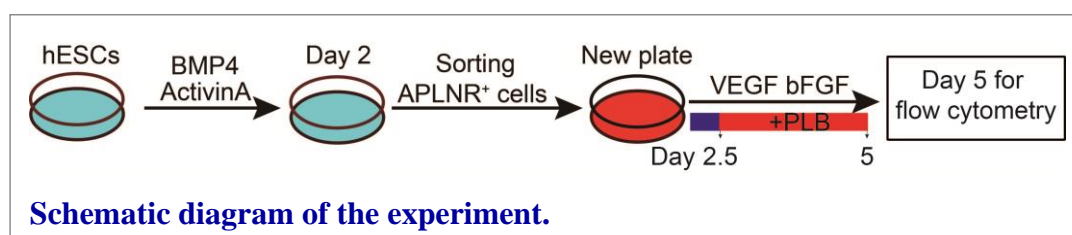

427 Query 7: Fig 3A - experimental strategy is not clearly explained: What are the cells  
 428 sorted and collected? Are the cells FACS-sorted at day 5? If so, what is their  
 429 phenotype? Are they HEP cells or are they stuck to APLNR+ stage?

430 Response 7:

431 1) On day 2, we purified APLNR<sup>+</sup> cells by flow cytometry and induced them to  
 432 undergo hematopoietic differentiation. After 12 hours of induction (at day 2.5),  
 433 PLB was added until day 5. All cells on day 5 were collected for RNA-Seq  
 434 analysis (Fig. 3A). We revised the schematic (Fig. 3A) and the relevant text on  
 435 page 10, lines 245-248. The figure is also shown below.

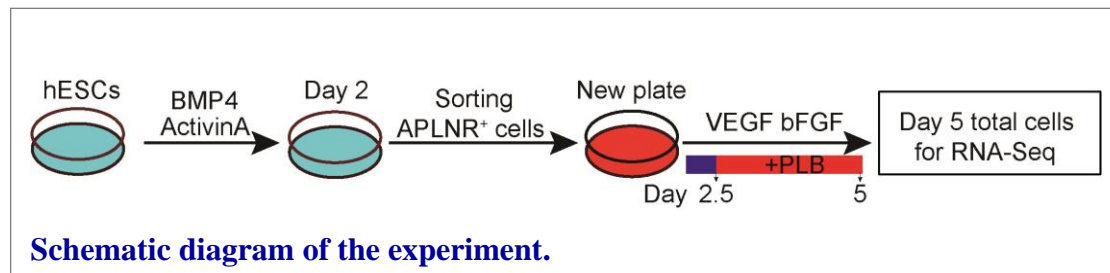

436

437 2) To determine the differentiation stage of the cells at day 5, we tested the presence  
 438 of APLNR<sup>+</sup> mesoderm cells, CD31<sup>+</sup>CD34<sup>+</sup> EPC and CD31<sup>+</sup>CD34<sup>+</sup>CD73<sup>-</sup> HEPs.  
 439 Little to no APLNR<sup>+</sup> cells could be detected on day 5 of differentiation. The  
 440 percentage of CD31<sup>+</sup>CD34<sup>+</sup> EPCs and CD31<sup>+</sup>CD34<sup>+</sup>CD73<sup>-</sup> HEPs were reduced  
 441 significantly upon PLB treatment, demonstrating that PLB impaired APLNR<sup>+</sup>  
 442 generation of EPC and HEP cells. This new data was incorporated into revised Fig.  
 443 2G and discussed on page 10, lines 234-238. The figures are also shown below.

444

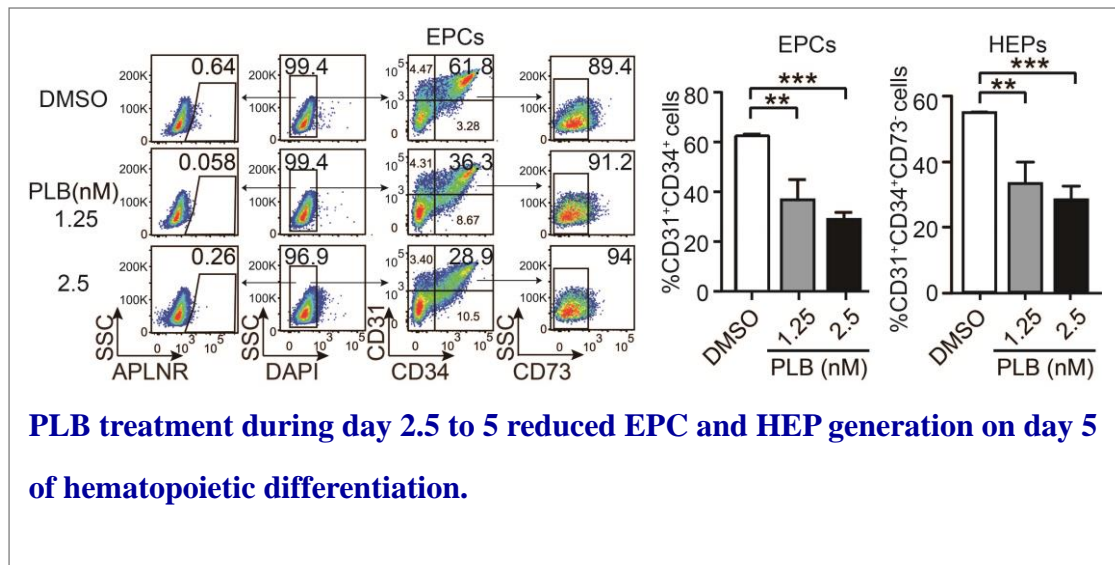

445

446 Query 8: Fig 3C - Heatmap of splicing factors showing HEP<sup>+</sup> PLB shows similar  
 447 profile to APLNR<sup>+</sup>. It would be nice to see this as scatter plot and correlation of  
 448 expression values. Does PLB treatment correlate with APLNR<sup>+</sup> genome wide, or only  
 449 at splicing factors?

450 Response 8:

451 We generated the scatter plot with splicing factors in the heatmap and all expressed  
 452 genes between APLNR<sup>+</sup> cells and PLB-treated cells at day 5 of differentiation. The  
 453 expression correlation coefficient (r) of the splicing factors and all expressed genes  
 454 was 0.98 and 0.81, respectively. So, the transcriptome of PLB treated-cells on day 5  
 455 was analogical to that of APLNR<sup>+</sup> cells, especially the expression of the splicing  
 456 factors. This new data was incorporated as Fig. EV4B and C and discussed on page 11,  
 457 lines 258-260. The figures are also shown below.

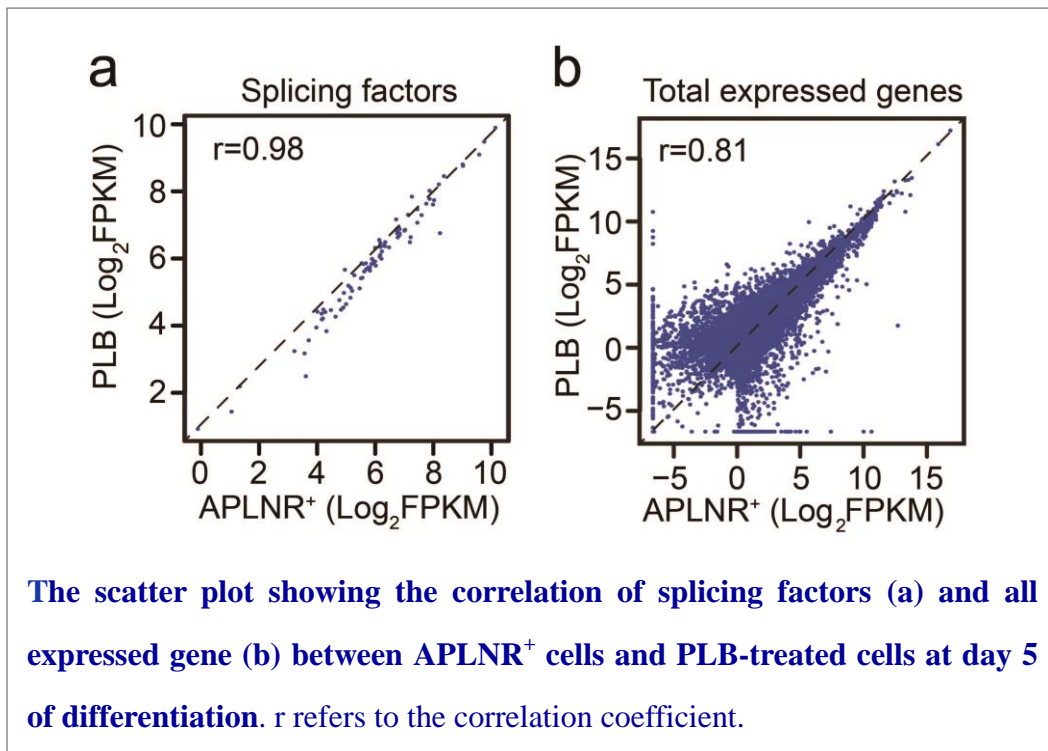

458

459 Query 9: Fig 3F - Inducible SRSF2 schematic does not show FLAG. Presumably it  
 460 does, otherwise the western is referring to a different construct. Were stable  
 461 transfected lines generated? This is not clearly explained neither in the main text nor  
 462 in the methods. If not, how were the cells overexpressing SRSF2 selected? If  
 463 Puromycin was used for selection, why do only a fraction of cells express GFP (in  
 464 Fig.4F). If GFP was used to identify the overexpressing population, please provide the  
 465 frequency of GFP<sup>+</sup> cells analysed in supplementary figure 3 (and in all the  
 466 overexpression experiments based on the same system).

467 Response 9:

468 1) Thank you for pointing this out. The FLAG was missing in the prior version of  
 469 the schematic, and we corrected this (Figure EV4F). The figure is also shown  
 470 below.

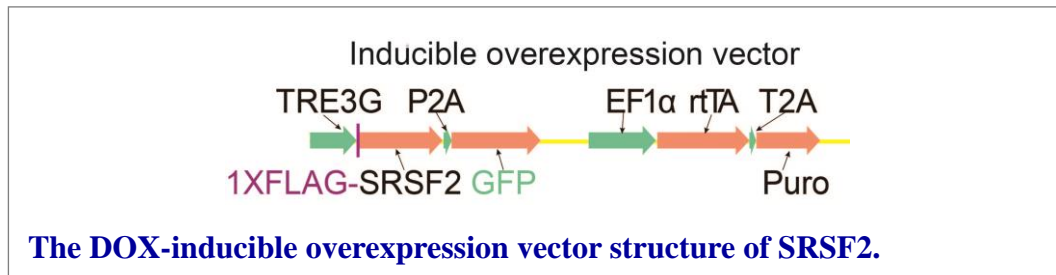

471

472 2) We generated a stable transfected hESC cell line. The transfected ESCs were  
 473 selected with 1µg/ml puromycin for at least 10 consecutive days under  
 474 self-renewal conditions (Fig. EV4F). The procedure to generate the stable  
 475 overexpression cell line is described in Materials and Methods on page 23, lines  
 476 574-585.

477 3) Although GFP<sup>+</sup> cells account for 70-90% at the onset of differentiation in each  
 478 stable overexpression cell line, we often detect a trend of decreased percentage of  
 479 GFP<sup>+</sup> cells during hematopoietic differentiation, consistent with previous studies  
 480 (Wang *et al*, 2018a; Wang *et al*, 2018b). This might result from dramatic  
 481 chromatin remodeling and consequent gene silencing during hESCs differentiation.

482 Query 10: Fig 3F and S3C-G - only one out of four factors (SRSF2) recapitulates  
 483 the decreased HEP generation, which is in agreement with its significant and  
 484 exclusive upregulation in response to PLB treatment. This seems a little light to  
 485 conclude that "In summary, the disturbed splicing as a result of the impediment of the  
 486 splicing factor switch leads to impaired HEP formation"?

487 Response 10:

488 Based on the recommendation, we revised the conclusion to: "In summary, inhibition  
 489 of the splicing factor switch contributes to impaired EPC formation". This new  
 490 description was incorporated on page 12, lines 293-294.

491 Query 11: Fig 4F - FACS gates showing SSC vs GFP, then CD34 CD31... Intended to  
492 show NUMB\_S induction recovers phenotype caused by PLB. However, as the GFP  
493 intensity of the NUMB-S vector is weaker than the empty vector, the SSC vs GFP  
494 gate does not capture the same population, and is enriched for higher GFP levels. This  
495 could bias the result. On the basis of what were the gates set? FMOs should be shown  
496 in the supplementary. Axis of the dotplots should be better labelled with fluorescent  
497 intensities.

498 Response 11:

499 1) The gating strategy in the prior version was based on isotype IgG controls. We  
500 agree with the reviewer that the FMO controls are better negative controls than  
501 IgG. We repeated the SRSF2 and HES1 overexpression experiments and this  
502 yielded the same results as with the IgG control. The figures are shown below.



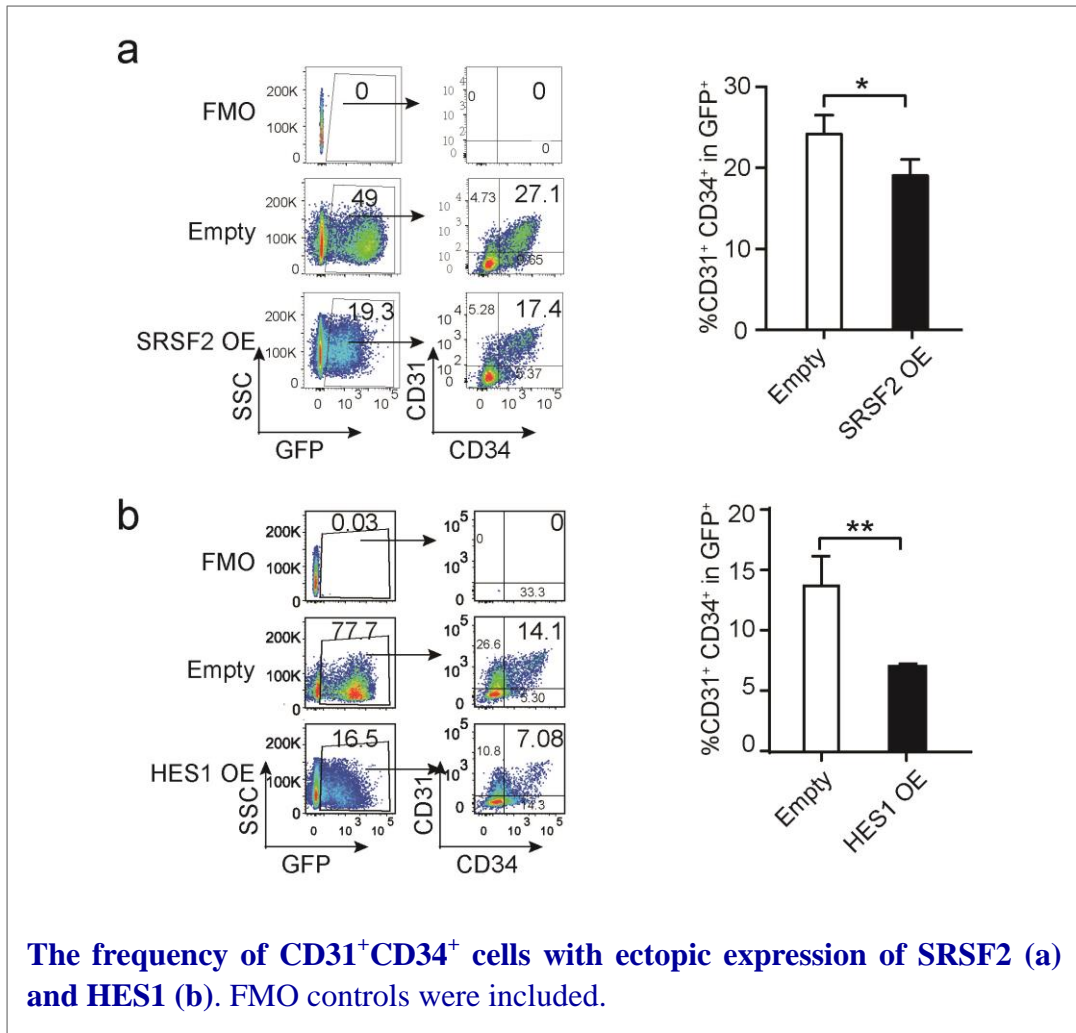

503

504 2) We parsed the GFP<sup>+</sup> population based on its fluorescent intensity. The similar  
 505 trend was detected when comparing the GFP population with coordinate  
 506 fluorescent intensity, which helps to exclude the possible biased data  
 507 interpretation. The data is shown below.

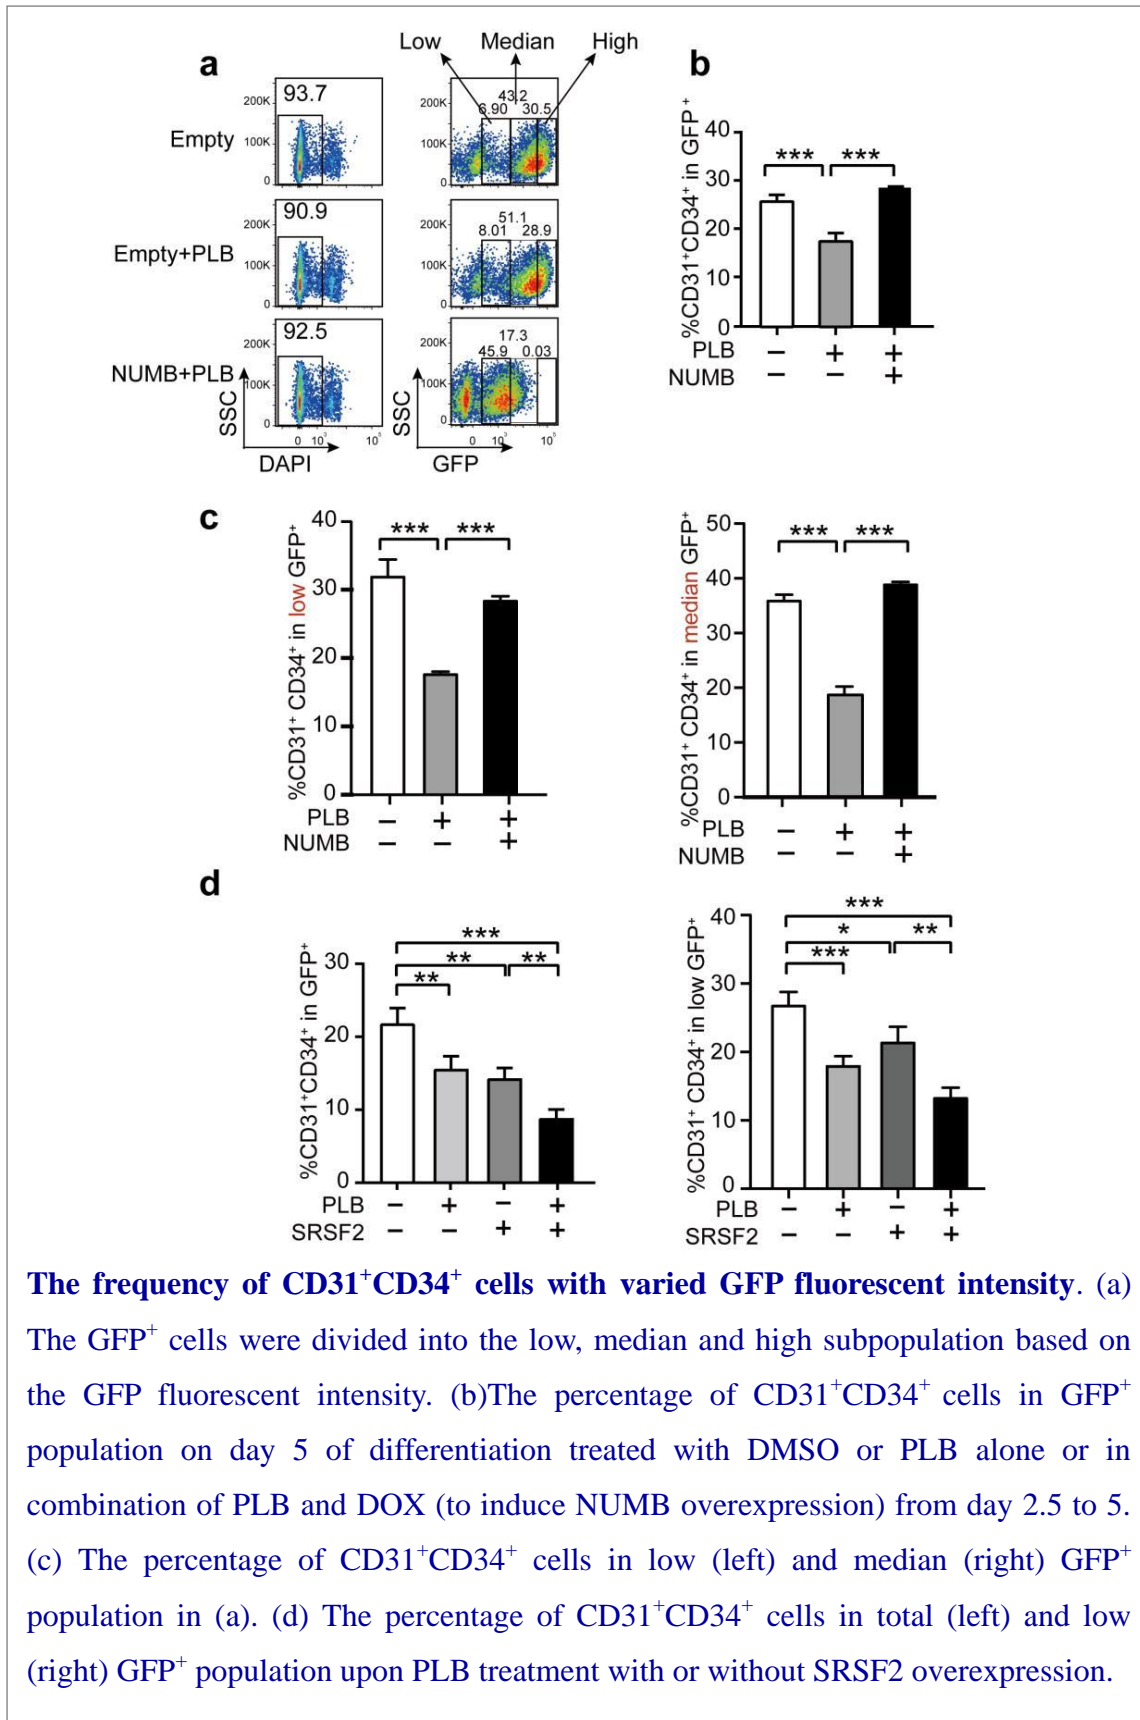

509 3) We updated all FACS plots in the figures with labeled axes. This new data was  
510 incorporated into Fig. 2C and G, Fig. 3H and K, Fig. 4F, Fig. 6H, Fig. EV2B and  
511 C, Fig. EV3J, Fig. EV4I, and Fig. EV5F.

512 Query 12: Fig 5C-D - This is already known and published (including the use of  
513 DAPT, Uenishi et al., Nat Communications 2018) and should be acknowledged in the  
514 main text.

515 Response 12:

516 We incorporated the reference and discussion in the main text on page 19, lines  
517 480-481.

518 Query 13: The conclusion that "NUMB-S controls the precise strength of NOTCH  
519 signaling and the HEP differentiation process, potentially by repressing HES1  
520 expression" needs the addition that the conclusion is based exclusively on the  
521 observation of the two factors independently. But there is no evidence supporting a  
522 direct or indirect effect of NUMB-S on HES1. The model in Fig 5J suggests otherwise  
523 and should be adapted.

524 Response 13:

525 1) We edited the conclusion as follows "These results suggest that HES1 might  
526 function downstream of NUMB\_S, directly or indirectly". We incorporated the  
527 description in the main text on pages 15-16, lines 394 -395.

528 2) The model of Fig. 6J was revised as recommended. The figure is also shown  
529 below.

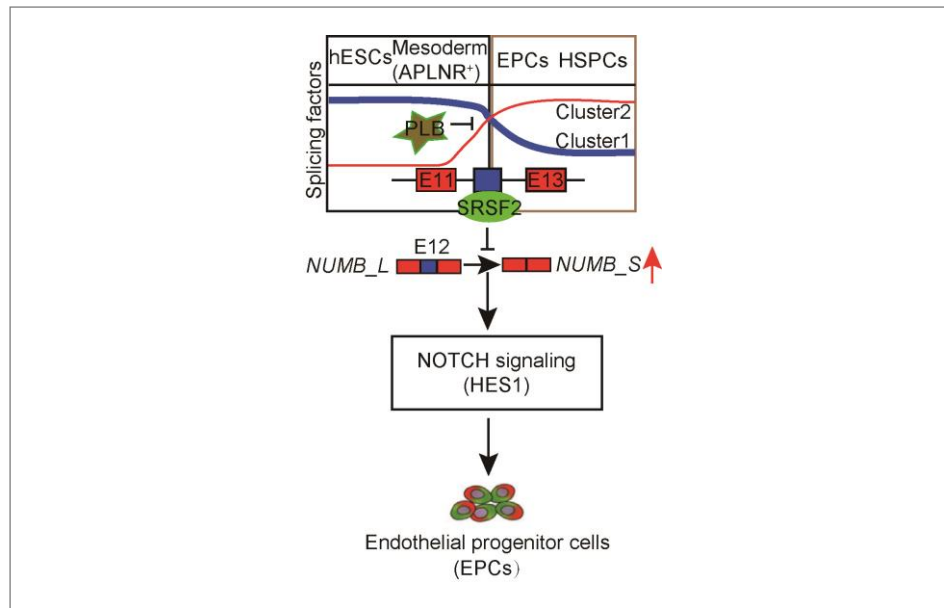

530

531 Minor points:

532 Fig 1H: "No changed genes" is somewhat confusing; "Number of changed genes"  
 533 would be clearer.

534 Response 1:

535 We revised it as "genes without DE" instead. Please find it in the updated Fig. 1H.

536 Fig 2A and 2C - units of measurement are missing on the quantification of flow  
 537 cytometry experiments (frequencies of ...? Absolute number?)

538 Response 2:

539 We relabeled the graphs as normalized frequency of  $CD43^+$  or  $CD31^+CD34^+$  in the  
 540 revised Fig. 2A, 2D and 6C.

541 Fig 3D - not clear what labels refer to what Venn circles

542 Response 3:

543 We matched the color of legends on the circles and Venn circles (revised Fig. 3D).

544 Fig 4C - Sashimi plot: Needs a y axis scale to allow comparison of relative transcript  
545 levels. Also needs exons labelled

546 Response 4:

547 Y axis scale of Sashimi plot and *NUMB* exons were supplied in the Fig. 4C.

548

549 Referee #3:

550 In this manuscript, the authors investigate the role of post-transcriptional RNA  
551 processing in hematopoietic development using a hPSC-based model. The authors  
552 apply a combination of wet lab approaches and bioinformatics analysis to identify  
553 novel players linked to the differentiation of mesodermal cells to hemogenic  
554 endothelial progenitor cells. Their investigation led to the identification of a  
555 widespread mechanism whereby a dynamic alternative splicing reprogramming occurs  
556 during hematopoietic development. They uncovered a splicing regulatory axis  
557 consisting of SRSF2-NUMB-NOTCH which seems to be an important contributor of  
558 hemogenic endothelial progenitor cells differentiation.

559

560 The manuscript is clear, concise, well written and figures are, in general,  
561 well-constructed. Furthermore, claims made by the authors are supported by the data  
562 generated from well-designed experiments.

563 [We appreciate the reviewer's positive comments.](#)

564 However, I feel that the manuscript could benefit from some minor  
565 clarifications/adjustments, as follows:

566

567 Query 1: The authors analysed the alternative splicing program of human  
568 hematopoietic development from ESCs and identified a splicing factor switch  
569 occurring during HEP generation (Figure 1). Have the author considered to examine  
570 the impact of alternative splicing events in splicing factors that could explain their  
571 switch in expression? In other words, is there an orchestrated AS program during  
572 differentiation that regulate splicing factors expression (eg. intron retention)?”

573 [Response 1:](#)

574 [Thanks for the constructive suggestion. We have analyzed the splicing events of](#)

575 expressed splicing factors of the 4 stages of human hematopoietic development from  
 576 ESCs. The data shown that MXE decreased from APLNR<sup>+</sup> to CD31<sup>+</sup>CD34<sup>+</sup> cells. So,  
 577 the splicing factor switch might associate with the reduced MXE splicing events from  
 578 APLNR<sup>+</sup> to CD31<sup>+</sup>CD34<sup>+</sup> cells. The figure was attached below.

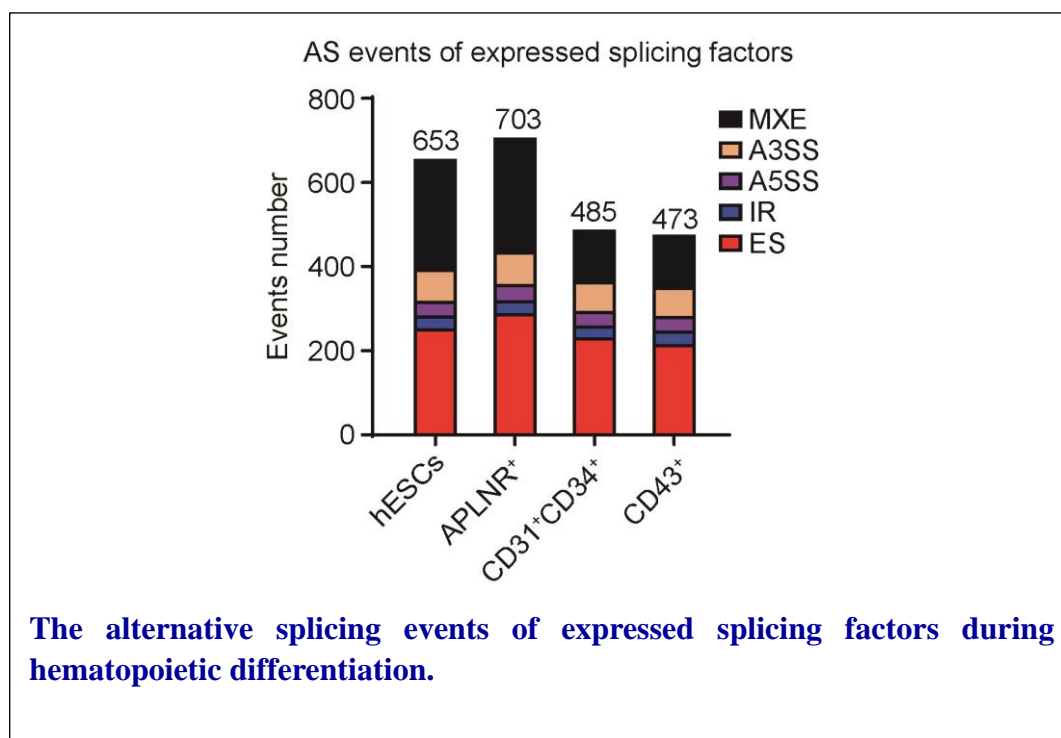

579

580 Query 2: The authors use pladienolide B (PLB), a natural inhibitor of the  
 581 spliceosome which targets SF3B1 but this compound is also cytotoxic and induced  
 582 apoptosis, even at a very low dose during hematopoietic differentiation process (data  
 583 not shown by the authors). Have the authors considered the use of siRNA/shRNA  
 584 targeting specifically SF3B1 to corroborate the data obtained with PLB treatment?

585 Response 2:

586 We generated stable cell lines with DOX-inducible expression of SF3B1 shRNAs and  
 587 SF3B1 downregulation was confirmed by RT-qPCR (reduced to 33-63%, P<0.001)  
 588 and Western blotting with 1 µg/ml DOX induction. This new data was incorporated as

589 Fig. EV3I. Consistent with the inhibitory effect of PLB on CD31<sup>+</sup>CD34<sup>+</sup> cells,  
 590 Downregulation of SF3B1 impaired CD31<sup>+</sup>CD34<sup>+</sup> generation. This new data was  
 591 incorporated as Fig. EV3J and K and discussed on page 9, lines 224-229. The figures  
 592 are also shown below.

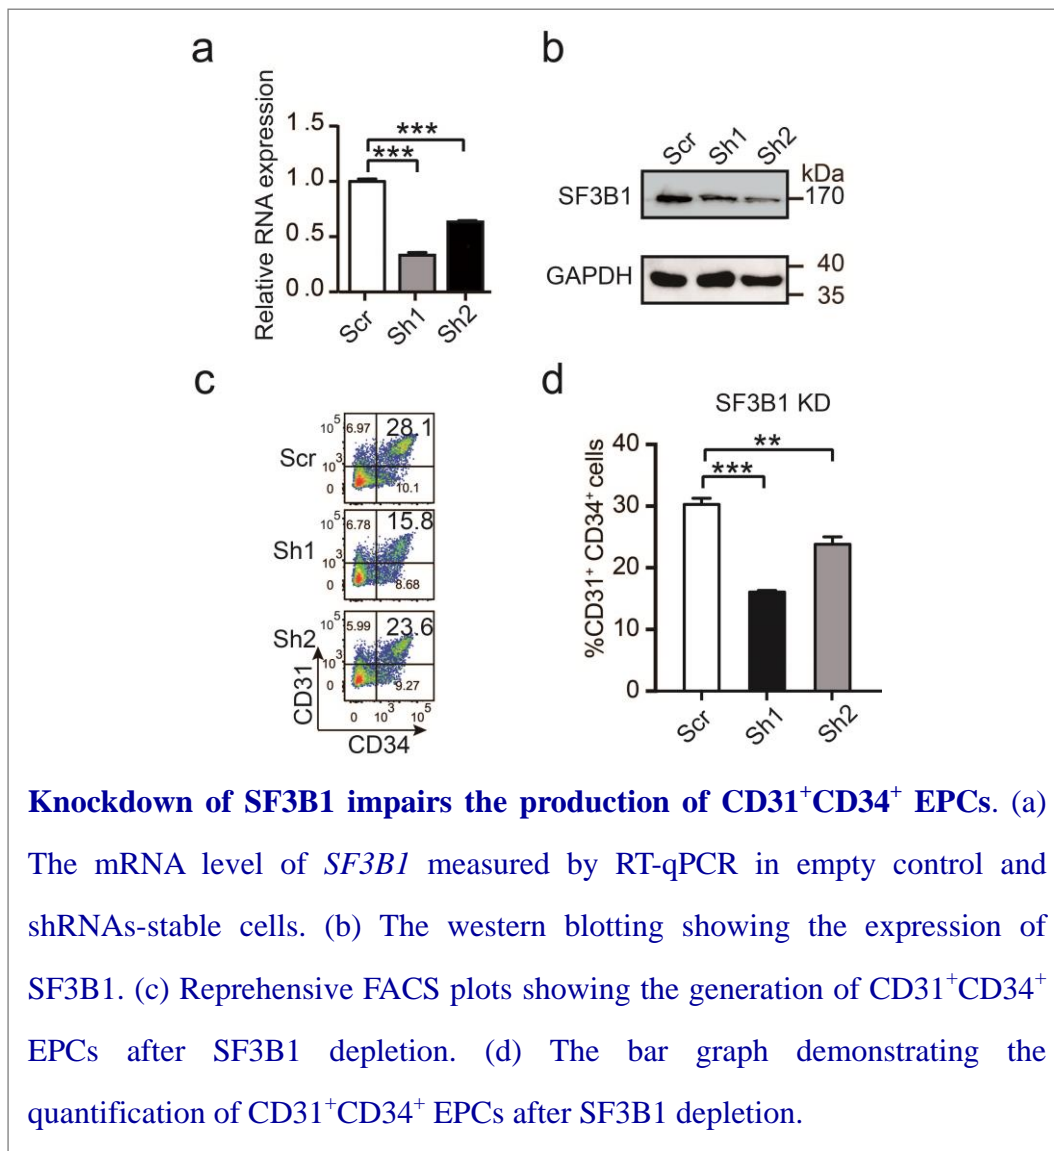

593

594 Query 3: Could the author explain (and clarify in the text) their choice of exon 9 of  
 595 LAS1L, ATP5F1C and HDAC7 (Figure 2 and S2) as markers of splicing defect after  
 596 PLB treatment? Why not including intron retention as markers of splicing defect  
 597 instead of exon inclusion? Furthermore, if I interpreted the data in the figures



598 correctly, DMSO treatment seems to have more effect (for *LAS1L* and *HDAC7*) than  
 599 with the two concentration of PLB tested. Any comment from the authors on that  
 600 particular point? (maybe I did misunderstand something and if that's the case I do  
 601 apologize for this comment).

602 **Response 3**

603 1) The reason we selected genes of *LAS1L*, *ATP5F1C* and *HDAC7* is they displayed  
 604 marked alternative isoform usage during  $APLNR^+$  to  $CD31^+CD34^+$  transition (Fig.  
 605 EV3A-C). In addition, given that exon skipping is the most prevalent splicing  
 606 event during hematopoietic development from ESCs, we tested exon skipping (e.g.  
 607 exon 9) after PLB treatment. This new data was incorporated as Fig. EV3A-C and  
 608 discussed on page 9, lines 211-214.

609 2) We also verified the altered intron retention for gene *RIPOR1*. The figure is shown  
 610 below.

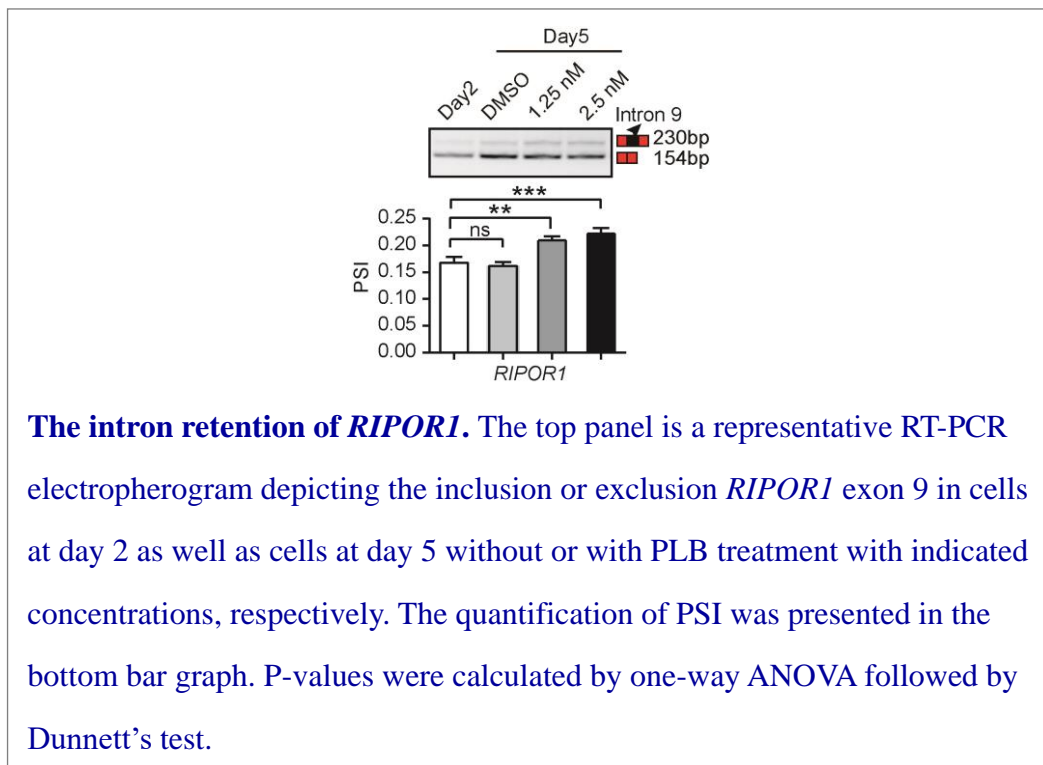

611 3) The first lane indicates isoform expression on day 2 of differentiation, while the  
612 second lane (DMSO lane) shows isoform expression on day 5 of differentiation.  
613 This result demonstrates that with the hematopoietic differentiation from day 2 to  
614 5, the expression of long isoforms of *LAS1L* and *HDAC7* were increased while the  
615 expression of short isoforms decreased. However, PLB blocked the isoform switch  
616 (lane 3 and 4).

617 Query 4: In Figure 4H, the authors detected (in silico) SRSF2 binding sites within  
618 NUMB-Exon12 and tested the effect of PLB treatment or/and SRSF2 overexpression  
619 on the expression of NUMB isoforms. The treatments led to the reduction of the level  
620 of the NUMB-S transcripts (Figure 4I) and a concomitant increase of the NUMB-L  
621 transcripts (Figure. 4J). They therefore concluded that SRSF2 functions in the  
622 regulation of NUMB alternative splicing. Have the author thought of inducing the  
623 knock down of SRSF2 to see if it induces the up-regulation of NUMB-Small isoform?  
624 Furthermore, it would be really essential to confirm that SRSF2 actually binds to exon  
625 12 (and to which binding sites) before they could claim that SRFS2 is the direct  
626 player regulating NUMB-Exon12 splicing (using mini-gene reporter or Protein-RNA  
627 pull-down assay).

628 Response 4:

629 1) We generated stable cell lines with DOX-inducible expression of SRSF2 shRNAs  
630 and SRSF2 downregulation was confirmed by Western blotting with 1 µg/ml  
631 DOX induction. This new data was incorporated as Fig. 3J. Consistent with the  
632 inhibitory effect of PLB on CD31<sup>+</sup>CD34<sup>+</sup> cells, downregulation of SRSF2  
633 enhanced CD31<sup>+</sup>CD34<sup>+</sup> generation (Fig. 3K and L) and upregulated *NUMB\_S*  
634 expression (Fig. EV5D and E). This new data was incorporated as Fig. 3J-L  
635 discussed on pages 11-12, lines 285-294 and Fig. EV5D and E discussed on page  
636 14, lines 361-364. The figures are shown below.

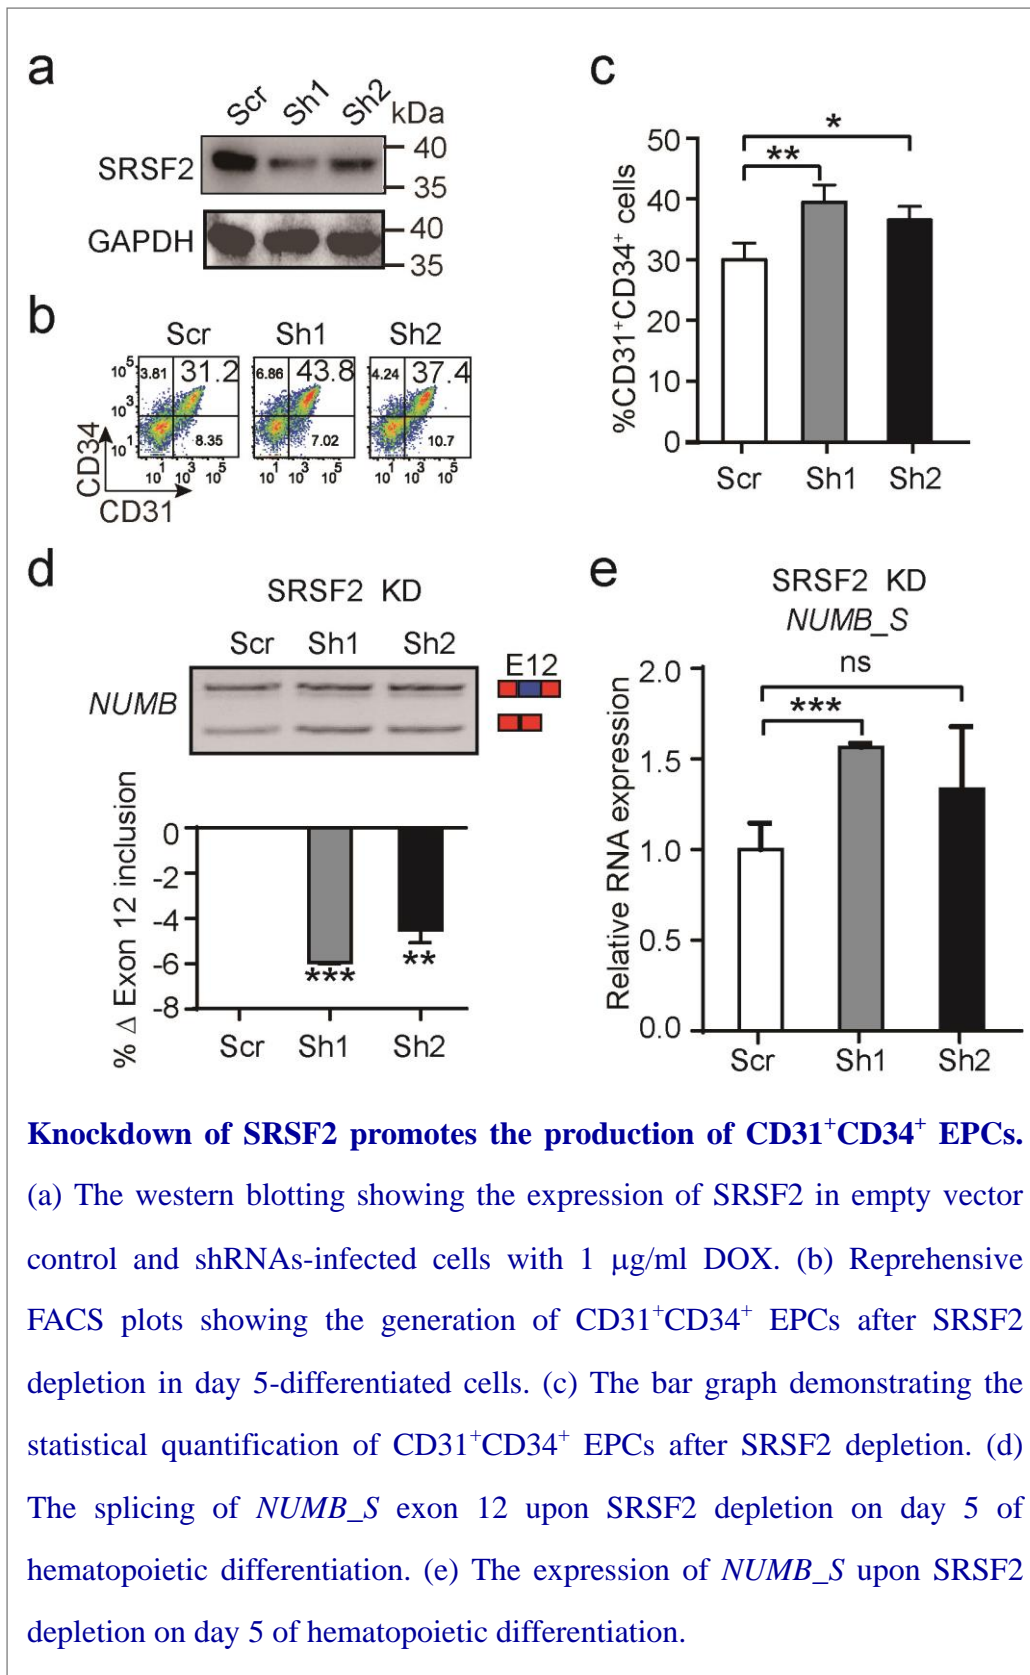

### Knockdown of SRSF2 promotes the production of CD31<sup>+</sup>CD34<sup>+</sup> EPCs.

(a) The western blotting showing the expression of SRSF2 in empty vector control and shRNAs-infected cells with 1  $\mu$ g/ml DOX. (b) Representative FACS plots showing the generation of CD31<sup>+</sup>CD34<sup>+</sup> EPCs after SRSF2 depletion in day 5-differentiated cells. (c) The bar graph demonstrating the statistical quantification of CD31<sup>+</sup>CD34<sup>+</sup> EPCs after SRSF2 depletion. (d) The splicing of *NUMB\_S* exon 12 upon SRSF2 depletion on day 5 of hematopoietic differentiation. (e) The expression of *NUMB\_S* upon SRSF2 depletion on day 5 of hematopoietic differentiation.

638 2) As shown in the revised Fig. 5, there were two putative SRSF2 binding motifs on  
639 *NUMB* exon 12 (M1 and M2, labeled as red) by RBPmap  
640 (<http://rbpmap.technion.ac.il/>) (Fig. 5A). To further validate the potential of  
641 SRSF2 to regulate splicing of *NUMB* exon 12 via these motifs, we performed a  
642 minigene splicing reporter assay. We constructed a truncated *NUMB* reporter  
643 encompassing a genomic fragment from 540 nucleotides upstream to 507  
644 nucleotides downstream of *NUMB* exon12. This reporter was cloned into an  
645 ExonTrap pET01 vector containing two constitutive exons, as reported previously  
646 (Rajendran *et al.*, 2016). We also constructed two mutant *NUMB* reporters by  
647 deleting each motif ( $\Delta$ M1 or  $\Delta$ M2), respectively. After co-transfection of each  
648 *NUMB* reporter (WT,  $\Delta$ M1 or  $\Delta$ M2) with SRSF2 expression plasmids into 293T  
649 cells simultaneously, we found that SRSF2 promoted the generation of *NUMB\_L*  
650 isoform via M1 but not M2 (Fig. 5B-D). This new data was incorporated as Fig.  
651 5A-D and described on page 14, lines 343-354 (highlighted in yellow). The  
652 figures are also shown below.

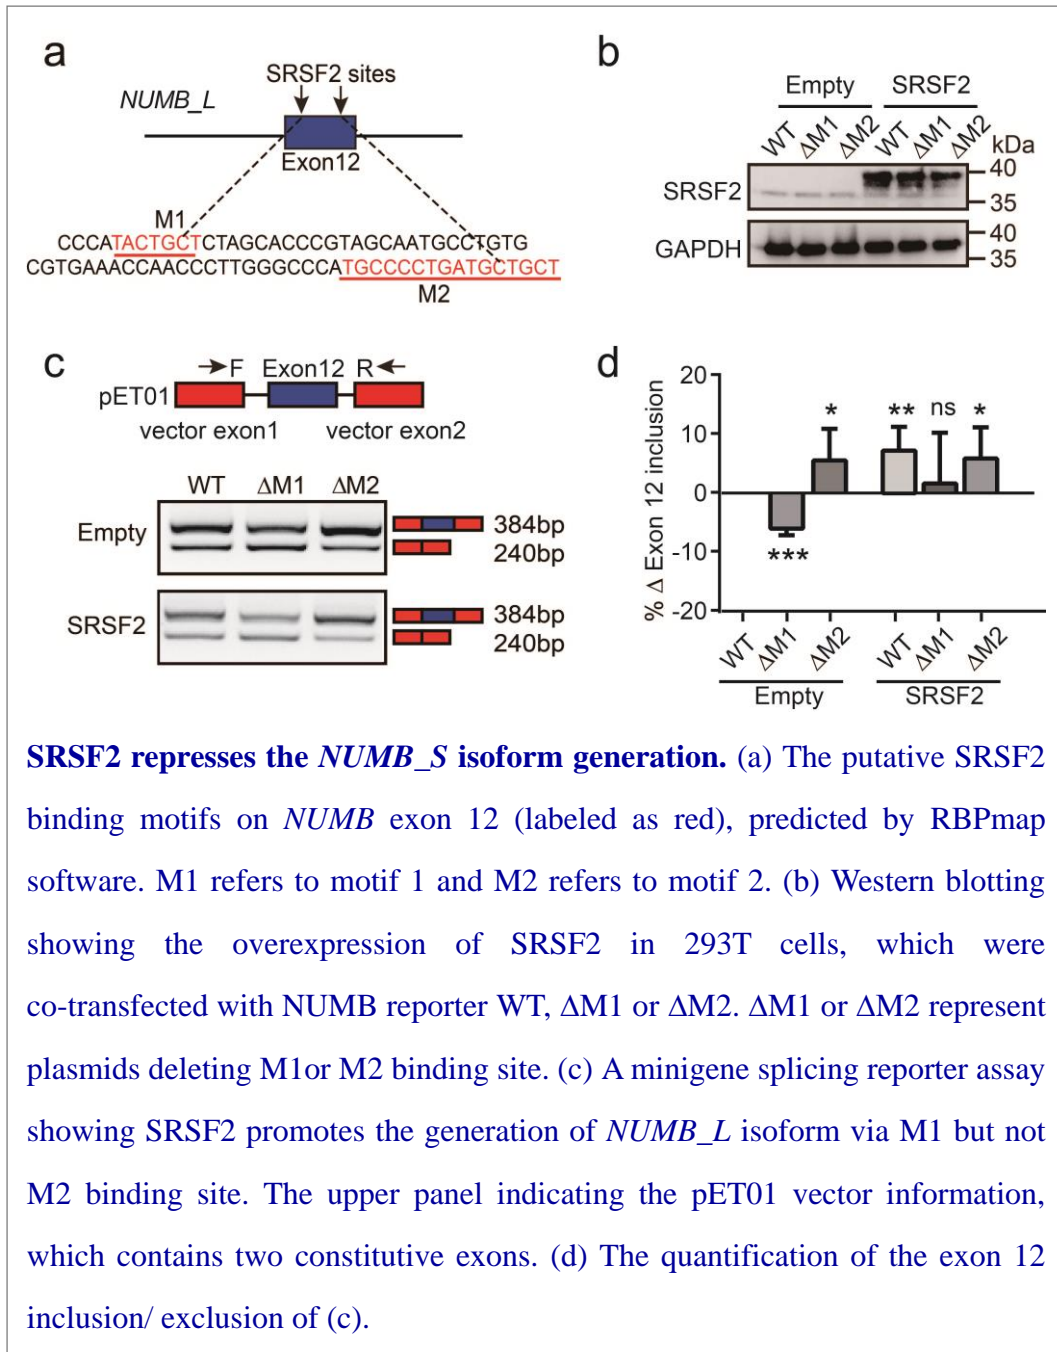

653

654

655

656

657 [References:](#)

- 658 Bechara EG, Sebestyén E, Bernardis I, Eyraes E, Valcárcel J (2013) RBM5, 6, and 10  
659 differentially regulate NUMB alternative splicing to control cancer cell proliferation.  
660 *Molecular cell* 52: 720-733
- 661 Ke H, Zhao L, Zhang H, Feng X, Xu H, Hao J, Wang S, Yang Q, Zou L, Su X *et al* (2018) Loss  
662 of TDP43 inhibits progression of triple-negative breast cancer in coordination with  
663 SRSF3. *Proceedings of the National Academy of Sciences of the United States of*  
664 *America* 115: E3426-e3435
- 665 Lu Y, Xu W, Ji J, Feng D, Sourbier C, Yang Y, Qu J, Zeng Z, Wang C, Chang X *et al* (2015)  
666 Alternative splicing of the cell fate determinant Numb in hepatocellular carcinoma.  
667 *Hepatology (Baltimore, Md)* 62: 1122-1131
- 668 Rajendran D, Zhang Y, Berry DM, McGlade CJ (2016) Regulation of Numb isoform  
669 expression by activated ERK signaling. *Oncogene* 35: 5202-5213
- 670 Tarn WY, Kuo HC, Yu HI, Liu SW, Tseng CT, Dhananjaya D, Hung KY, Tu CC, Chang SH,  
671 Huang GJ *et al* (2016) RBM4 promotes neuronal differentiation and neurite outgrowth  
672 by modulating Numb isoform expression. *Mol Biol Cell* 27: 1676-1683
- 673 Wang H, Liu C, Liu X, Wang M, Wu D, Gao J, Su P, Nakahata T, Zhou W, Xu Y *et al* (2018a)  
674 MEIS1 Regulates Hemogenic Endothelial Generation, Megakaryopoiesis, and  
675 Thrombopoiesis in Human Pluripotent Stem Cells by Targeting TAL1 and FLI1. *Stem cell*  
676 *reports* 10: 447-460
- 677 Wang M, Wang H, Wen Y, Chen X, Liu X, Gao J, Su P, Xu Y, Zhou W, Shi L *et al* (2018b)  
678 MEIS2 regulates endothelial to hematopoietic transition of human embryonic stem cells  
679 by targeting TAL1. *Stem cell research & therapy* 9: 340-340

Dear Dr. Shi,

Thank you for the submission of your revised manuscript to our editorial offices. We have now received the reports from the three referees that were asked to re-evaluate your study, you will find below. As you will see, the referees now support the publication of your study in EMBO reports. However, referee #1 has some remaining points and some suggestions to improve the study, we ask you to address in a final revised manuscript.

Moreover, I have these editorial requests:

- I would suggest this slightly modified title:

A splicing factor switch controls hematopoietic lineage specification of pluripotent stem cells

- Please provide the abstract written in present tense.

- Regarding data quantification and statistics, please make sure that the number "n" for how many independent experiments were performed, their nature (biological versus technical replicates), the bars and error bars (e.g. SEM, SD) and the test used to calculate p-values is indicated in the respective figure legends (also of the EV figures). Please provide statistical testing where applicable.

- In panel D of Fig. EV3 the first two images of the middle column are identical (4 - DMSO and 1.25 PLB). Please check.

- As the Western blots shown are significantly cropped, could you provide the source data for all the blots (main and EV figures). The source data will be published in a separate source data file online along with the accepted manuscript and will be linked to the relevant figure. Please submit the source data (scans of entire blots) together with the revised manuscript. Please include size markers for scans of entire blots, label the scans with figure and panel number and send one PDF file per figure.

- It seems not all authors listed on the title page are mentioned in the author contributions section. Please check.

- Table EV1 needs to be a dataset. Please call this Dataset EV1 and update the call-outs. Please remove the legend of this dataset file from the manuscript text and add it as the first TAB to the excel sheet.

- Table EV2 needs then to be re-named as Table EV1. Please also update the call-outs. Please put the legend as general title to the table file (Sequences of all primers used), and remove that from the manuscript main text.

- Finally, please find attached a word file of the manuscript text (provided by our publisher) with changes we ask you to include in your final manuscript text, and some queries, we ask you to address. Please provide your final manuscript file with track changes, in order that we can see any modifications done.

In addition, I would need from you:

- a short, two-sentence summary of the manuscript
- two to three bullet points highlighting the key findings of your study
- a schematic summary figure (in jpeg or tiff format with the exact width of 550 pixels and a height of not more than 400 pixels) that can be used as a visual synopsis on our website.

Please note that all corresponding authors are required to supply an ORCID ID for their name upon submission of a revised manuscript. Please do that for corresponding author Zhou. Please find instructions on how to link the ORCID ID to the account in our manuscript tracking system in our Author guidelines:

<http://www.embopress.org/page/journal/14693178/authorguide#authorshipguidelines>

I look forward to seeing the final revised version of your manuscript when it is ready. Please let me know if you have questions regarding the revision.

Yours sincerely

Achim Breiling  
Editor  
EMBO Reports

-----  
Referee #1:

In this revised manuscript, the authors worked hard to address the critiques by addition of several new experiments. They also improved the discussion of their work in relation to previous studies by citation of additional literature. However, in my opinion, there are still some questions that need to be addressed before the novel model of a SRSF2-NUMB-NOTCH regulatory axis can be supported as a pathway to control HEP specification. Admittedly, validating all the major steps in a single paper is quite an arduous undertaking.

1. SRSF2. Regarding the critiques about SRSF2 as a regulator of NUMB-S splicing: the authors have partially strengthened this part of the model by adding new data. Using a minigene splicing reporter to study regulation of NUMB exon 12, they showed (Fig. 5D/E) that over-expression of SRSF2 promotes an increase in exon 12 inclusion in 293T cells, and that this effect requires the predicted SRSF2 binding site designated as M1. This is consistent with the model that reduced expression of SRSF2 during differentiation will lead to reduced exon 12 splicing, i.e., increased NUMB-S.

So, the new data better support the hypothesis that SRSF2 can regulate NUMB splicing via a binding site in exon 12. But I'm not completely convinced that the aggregate can yet support assigning SRSF2 a prominent role as a key component of a SRSF2-NUMB-NOTCH axis. There are a few issues.

First, it's not clear from the splicing reporter study in 293T cells that the magnitude of the SRSF2 effect is sufficient to explain NUMB-S splicing regulation during differentiation. Differentiation of APNLR+ (exon 12 PSI=74) was accompanied by a large decrease in SRSF2 expression in parallel with a large decrease in splicing: PSI=17 at day 5 of differentiation (PSI=17). This data is in Fig. 4C. If SRSF2 is the major regulator of that splicing switch, wouldn't we expect a strong effect also in 293T cells? But over-expression of SRSF2 in 293 cells only showed a modest increase in exon 12 splicing, with a change in PSI<10 (Fig. 5C/D).



Second, while the the effects of SRSF2 knockdown on NUMB splicing was not tested in the 293T cells, this activity was examined in differentiating hemogenic progenitor cells (Figure EV5). There appeared to be only a modest effect on NUMB splicing, e.g., parts D and E shows <10% change in exon 12 splicing. In that experiment the NUMB-S PCR band still appeared to be less abundant than the NUMB-L product (whereas NUMB-S should be more abundant than NUMB-L at day 5, see Fig. 4B).

On the other hand, the new data in Figure 3G and 3H seem to show that SRSF2 over-expression greatly depresses EPC production. This would support the authors' model, but I am a little worried about the huge difference in percentage of GFP+ cells in the empty vector vs SRSF2-over-expressing cells, and the position of the GFP+ gate in relation to the overall shape of the cell profile. Is it possible that the difference in profiles might complicate the interpretation of effects on EPC production? Is it possible that over-expression is so harmful to these cells that the GFP+ population is low due to killing of the cells?

2. HES1. Regarding the query about the mechanism of action of HES1: The authors responded to this query by adding data to rule out the possibility that HES1 acts upstream to regulate SRSF2 expression. That new data convincingly rules out that alternative model. However, I still worry whether the data quantitatively make sense to support NUMB-S regulation of HES1, and HES1 as the major regulator of NOTCH. For example, in Figure 6E, the treatment of cells with PLB only increases HES1 expression by maybe 25%, and forced expression of NUMB-S in PLB-inhibited cells mostly reduces that back to the baseline observed in cells differentiated in the absence of PLB. That doesn't seem like a strong regulator to me. However, I am not an expert in transcription, and could be convinced to accept the argument if there is literature showing that this order of magnitude change in HES1 is sufficient to modulate NOTCH.

3. Other literature. The paper is much improved with respect to discussing other literature about regulation of NUMB splicing. I would recommend one additional change, that is, to explain that the exon they refer to as exon 12 is in fact the same exon designated as exon 9 in some other studies, e.g., the paper by Rajendran (unless I am mistaken).

Minor issues:

1. Line 299-300: "Additionally, genes exhibiting isoform proportion changes ( $\Delta$  iso > 0.15; blue circle) or genes with differentially expressed isoforms". The question is, what is the difference between isoform proportion changes and differentially expressed isoforms?

2. Line 338 "We ectopic expression of SRSF2 during EPCs generation". Something is missing in that sentence.

3. Line 393-4 "Moreover, the combined induction of NUMB\_S and the inhibition of splicing with PLB restored HES1 expression (Fig. 6E)" [actually, restored lower expression]

-----  
Referee #2:

The authors have adequately addressed my concerns and the changes have improved the manuscript.

-----

Referee #3:

The authors have successfully addressed all my comments/suggestions but also the ones from the two other referees; therefore, I recommend their manuscript for publication in EMBO reports.

### Response for Reviewer

-----

Referee #1:

In this revised manuscript, the authors worked hard to address the critiques by addition of several new experiments. They also improved the discussion of their work in relation to previous studies by citation of additional literature. However, in my opinion, there are still some questions that need to be addressed before the novel model of a SRSF2-NUMB-NOTCH regulatory axis can be supported as a pathway to control HEP specification. Admittedly, validating all the major steps in a single paper is quite an arduous undertaking.

1. SRSF2. Regarding the critiques about SRSF2 as a regulator of NUMB-S splicing: the authors have partially strengthened this part of the model by adding new data. Using a minigene splicing reporter to study regulation of NUMB exon 12, they showed (Fig. 5D/E) that over-expression of SRSF2 promotes an increase in exon 12 inclusion in 293T cells, and that this effect requires the predicted SRSF2 binding site designated as M1. This is consistent with the model that reduced expression of SRSF2 during differentiation will lead to reduced exon 12 splicing, i.e., increased NUMB-S.

So, the new data better support the hypothesis that SRSF2 can regulate NUMB splicing via a binding site in exon 12. But I'm not completely convinced that the aggregate can yet support assigning SRSF2 a prominent role as a key component of a SRSF2-NUMB-NOTCH axis. There are a few issues.

First, it's not clear from the splicing reporter study in 293T cells that the magnitude of the SRSF2 effect is sufficient to explain NUMB-S splicing regulation during differentiation. Differentiation of APNLR+ (exon 12 PSI=74) was accompanied by a large decrease in SRSF2 expression in parallel with a large decrease in splicing: PSI=17 at day 5 of differentiation (PSI=17). This data is in Fig. 4C. If SRSF2 is the major regulator of that splicing switch, wouldn't we expect a strong effect also in 293T cells? But over-expression of SRSF2 in 293 cells only showed a modest increase in exon 12 splicing, with a change in PSI<10 (Fig. 5C/D).

Second, while the effects of SRSF2 knockdown on NUMB splicing was not tested in the 293T cells, this activity was examined in differentiating hemogenic progenitor cells (Figure EV5). There appeared to be only a modest effect on NUMB splicing, e.g., parts D and E shows <10% change in exon 12 splicing. In that experiment the NUMB-S PCR band still appeared to be less abundant than the NUMB-L product (whereas NUMB-S should be more abundant than NUMB-L at day 5, see Fig. 4B).

Response:

- 1) We really appreciate the careful review and the insightful comments.
- 2) Based on the minigene reporter assay, the overexpression of SRSF2 in 293T cells did not show the similar effect on NUMB splicing regulation as in EPCs. Also the knockdown of SRSF2 in EPCs displayed a modest effect on NUMB splicing. This could be partially explained by the possible cellular specificity of SRSF2 on NUMB splicing, e.g. 293T cells versus EPCs. Or it is likely that the level of overexpression or knockdown of SRSF2 could influence the effect on NUMB splicing.
- 3) Of course, we cannot rule out the possibility that other genes, such as SRSF1, SRSF3 or other yet unknown splicing factors, could be involved in the regulation of

NUMB splicing in EPCs as well. We have incorporated this possibility in the discussion section on page 19, lines 464-470 and toned down the role of SRSF2 on NUMB splicing in the entire manuscript.

On the other hand, the new data in Figure 3G and 3H seem to show that SRSF2 over-expression greatly depresses EPC production. This would support the authors' model, but I am a little worried about the huge difference in percentage of GFP+ cells in the empty vector vs SRSF2-over-expressing cells, and the position of the GFP+ gate in relation to the overall shape of the cell profile. Is it possible that the difference in profiles might complicate the interpretation of effects on EPC production? Is it possible that over-expression is so harmful to these cells that the GFP+ population is low due to killing of the cells?

Response:

- 1) To rule out the possibility that the difference in GFP<sup>+</sup> profiles might complicate the interpretation of effects on EPC production. We parsed the GFP<sup>+</sup> population based on its fluorescent intensity. The similar trend was detected when comparing the GFP population with coordinate fluorescent intensity, which helps to exclude the possible biased data interpretation. The data is shown below.

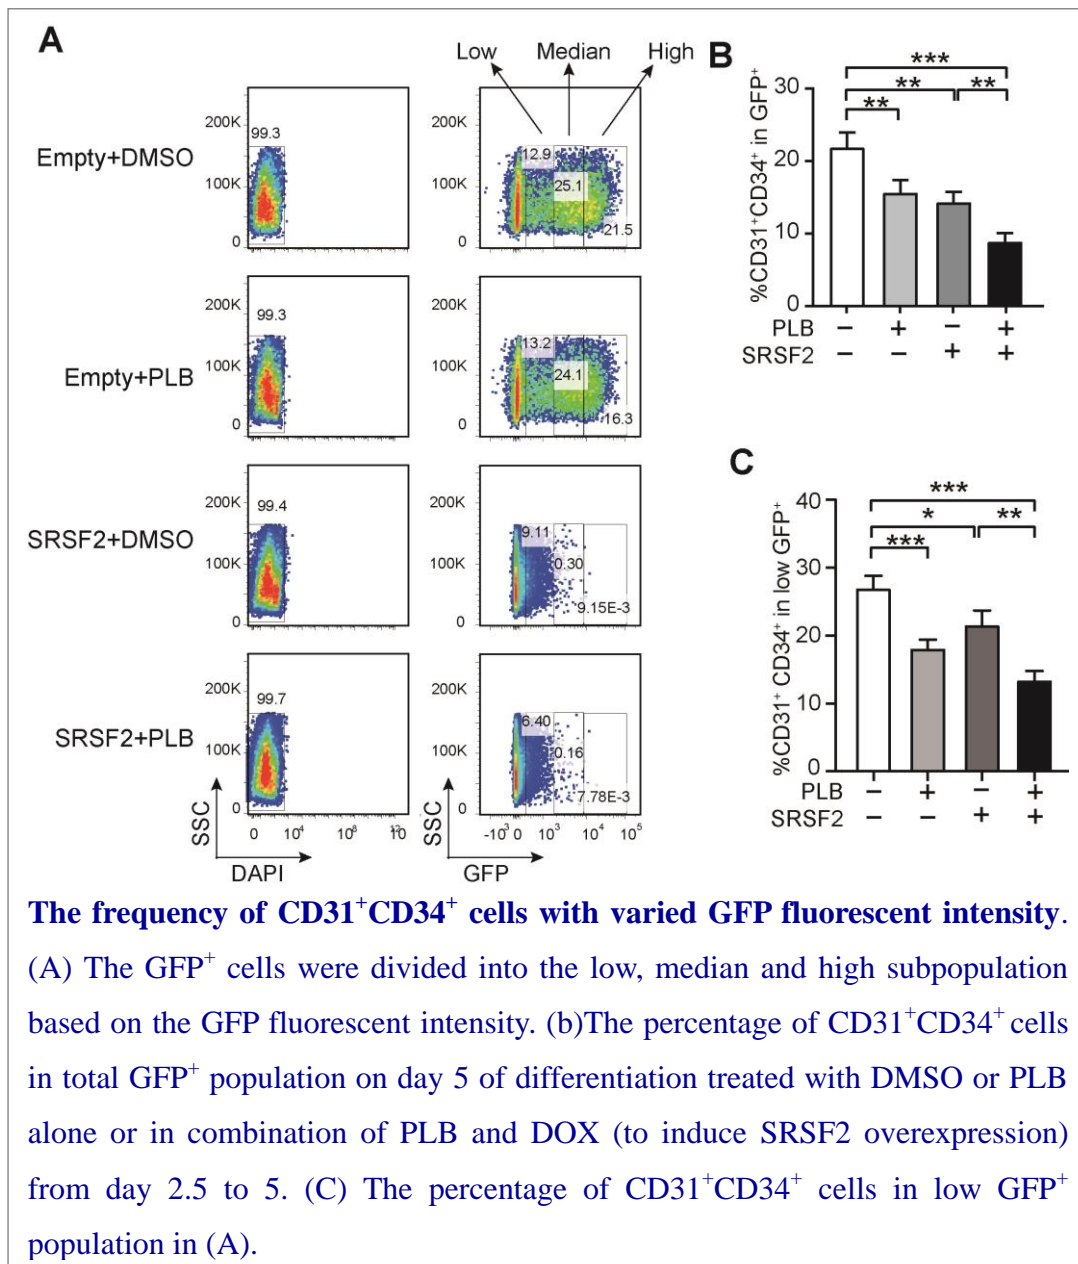

2) We did not observe the increased cell death in the SRSF2 overexpressed cells during differentiation. Although GFP<sup>+</sup> cells account for 70-90% at the onset of differentiation in each stable overexpression cell line, we often detect a trend of decreased percentage of GFP<sup>+</sup> cells during hematopoietic differentiation, consistent with previous studies (Wang *et al*, 2018a; Wang *et al*, 2018b). We believe such decline could result from dramatic chromatin remodeling and consequent gene silencing during hESCs differentiation.

2. HES1. Regarding the query about the mechanism of action of HES1: The authors responded to this query by adding data to rule out the possibility that HES1 acts upstream to regulate SRSF2 expression. That new data convincingly rules out that alternative model. However, I still worry whether the data quantitatively make sense to support NUMB-S regulation of HES1, and HES1 as the major regulator of NOTCH. For example, in Figure 6E, the treatment of cells with PLB only increases HES1 expression by maybe 25%, and forced expression of NUMB-S in PLB-inhibited cells mostly reduces that back to the baseline observed in cells differentiated in the absence of PLB. That doesn't seem like a strong regulator to me. However, I am not an expert in transcription, and could be convinced to accept the argument if there is literature showing that this order of magnitude change in HES1 is sufficient to modulate NOTCH.

Response:

Prior studies have shown that HES1 expression is exquisitely controlled. HES1 binds to its own promoter to repress its own expression in neural stem cells ((Hirata *et al*, 2002). Additionally, Notch ligand Dll1 activates Notch signaling and concomitantly induces HES1 expression ((Jarriault *et al*, 1995); (Ohtsuka *et al*, 1999)) and the activation of HES1, in turn, represses Dll1 expression in neural cells(Kageyama *et al*, 2008). Due to HES1 expression is precisely regulated by multiple negative feedback loops, we assume that the variation of its expression should often be modest. Thus, it is possible that 25% of HES1 induction could exert biological functions.

3. Other literature. The paper is much improved with respect to discussing other literature about regulation of NUMB splicing. I would recommend one additional change, that is, to explain that the exon they refer to as exon 12 is in fact the same exon designated as exon 9 in some other studies, e.g., the paper by Rajendran (unless I am mistaken).

Response:

The reviewer is right. The exon we referred to as exon 12 is the same exon designated as exon 9 in some other studies e.g., the paper by Rajendran. As suggested, we changed the exon 12 to 9 in the revised manuscript.

Minor issues:

1. Line 299-300: "Additionally, genes exhibiting isoform proportion changes (delta iso > 0.15; blue circle) or genes with differentially expressed isoforms". The question is, what is the difference between isoform proportion changes and differentially expressed isoforms?

Response 1:

Isoform proportion, which is calculated as the expression of an individual isoform to the sum of all isoforms belonging to the same gene, is a metric to quantify the activity of splicing at the isoform level (Monlong et al, 2014). Differentially expressed isoforms were identified by using DESeq2 (version 1.20.0) (Love et al, 2014) with default settings between two consecutive differentiation stages. Accordingly, differentially expressed isoforms may not exhibit isoform proportion changes. Their definition and description could be found in method section on page 26-27, lines 646-651 and lines 660-666.

2. Line 338 "We ectopic expression of SRSF2 during EPCs generation". Something is missing in that sentence.

Response 2:

Thanks for pointing it out. We changed the sentence to "Ectopic expression of SRSF2 during EPCs generation recapitulated the reduced generation of EPCs obtained with PLB treatment."



3. Line 393-4 "Moreover, the combined induction of NUMB\_S and the inhibition of splicing with PLB restored HES1 expression (Fig. 6E)" [actually, restored lower expression]

Response 3:

We changed the sentence to "Moreover, the combined induction of NUMB\_S and the inhibition of splicing with PLB restored the HES1 expression to its normal level (Fig. 6E)" as suggested by the reviewer on page 15, line 391.

-----

Referee #2:

The authors have adequately addressed my concerns and the changes have improved the manuscript.

Response: We thank for the reviewer for supporting our work.

-----

Referee #3:

The authors have successfully addressed all my comments/suggestions but also the ones from the two other referees; therefore, I recommend their manuscript for publication in EMBO reports.

Response: We thank for the reviewer for supporting our work.

References

Hirata H, Yoshiura S, Ohtsuka T, Bessho Y, Harada T, Yoshikawa K, Kageyama R (2002)

Oscillatory expression of the bHLH factor Hes1 regulated by a negative feedback loop.

*Science* 298: 840-843

Jarriault S, Brou C, Logeat F, Schroeter EH, Kopan R, Israel A (1995) Signalling downstream

of activated mammalian Notch. *Nature* 377: 355-358

Kageyama R, Ohtsuka T, Shimojo H, Imayoshi I (2008) Dynamic Notch signaling in neural

progenitor cells and a revised view of lateral inhibition. *Nature neuroscience* 11: 1247-1251

Ohtsuka T, Ishibashi M, Gradwohl G, Nakanishi S, Guillemot F, Kageyama R (1999) Hes1 and

Hes5 as notch effectors in mammalian neuronal differentiation. *The EMBO journal* 18:

2196-2207

Wang H, Liu C, Liu X, Wang M, Wu D, Gao J, Su P, Nakahata T, Zhou W, Xu Y *et al* (2018a)

MEIS1 Regulates Hemogenic Endothelial Generation, Megakaryopoiesis, and

Thrombopoiesis in Human Pluripotent Stem Cells by Targeting TAL1 and FLI1. *Stem cell*

*reports* 10: 447-460

Wang M, Wang H, Wen Y, Chen X, Liu X, Gao J, Su P, Xu Y, Zhou W, Shi L *et al* (2018b)

MEIS2 regulates endothelial to hematopoietic transition of human embryonic stem cells by

targeting TAL1. *Stem cell research & therapy* 9: 340-340

Lihong Shi  
State Key Laboratory of Experimental Hematology, Institute of Hematology & Blood Diseases  
Hospital  
NanJing road, No.288  
Tianjin 300200  
China

Dear Dr. Shi,

I am very pleased to accept your manuscript for publication in the next available issue of EMBO reports. Thank you for your contribution to our journal.

At the end of this email I include important information about how to proceed. Please ensure that you take the time to read the information and complete and return the necessary forms to allow us to publish your manuscript as quickly as possible.

As part of the EMBO publication's Transparent Editorial Process, EMBO reports publishes online a Review Process File to accompany accepted manuscripts. As you are aware, this File will be published in conjunction with your paper and will include the referee reports, your point-by-point response and all pertinent correspondence relating to the manuscript.

If you do NOT want this File to be published, please inform the editorial office within 2 days, if you have not done so already, otherwise the File will be published by default [contact: [emboreports@embo.org](mailto:emboreports@embo.org)]. If you do opt out, the Review Process File link will point to the following statement: "No Review Process File is available with this article, as the authors have chosen not to make the review process public in this case."

Should you be planning a Press Release on your article, please get in contact with [emboreports@wiley.com](mailto:emboreports@wiley.com) as early as possible, in order to coordinate publication and release dates.

Thank you again for your contribution to EMBO reports and congratulations on a successful publication. Please consider us again in the future for your most exciting work.

Yours sincerely,

Achim Breiling  
Editor  
EMBO Reports

-----  
Referee #1:

I thank the authors for their response to the critique. They present an attractive model that makes very important and novel points about the contribution of alternative splicing to differentiation of HEP. It is highly impressive that a single alternative splicing switch in the NUMB gene can substantially impact HEP formation. It is also clear that SRSF2 is a splicing factor that can modulate

NUMB splicing, and changes expression during differentiation in a manner consistent with a physiological role in regulating NUMB. My main concern is whether the SRSF2 is really the major regulator of NUMB splicing, to justify the "SRSF2-NUMB-NOTCH regulatory axis" terminology. The effects of SRSF2 expression on NUMB splicing in over-expression and knockdown assays were modest, regulating NUMB splicing much less than what occurs during HEP differentiation. My opinion is that the SRSF2-NUMB-NOTCH regulatory axis, while not entirely wrong, is probably an over-simplification. On that point, the discussion is improved by recognizing that other splicing factors may also play a role in the NUMB switch.

Minor point: there is a grammatical error in the abstract: "We identify a splicing factor switch links to the" (should be "linked").

\*\*\*\*\*

#### THINGS TO DO NOW:

You will receive proofs by e-mail approximately 2-3 weeks after all relevant files have been sent to our Production Office; you should return your corrections within 2 days of receiving the proofs.

Please inform us if there is likely to be any difficulty in reaching you at the above address at that time. Failure to meet our deadlines may result in a delay of publication, or publication without your corrections.

All further communications concerning your paper should quote reference number EMBOR-2020-50535V3 and be addressed to [emboreports@wiley.com](mailto:emboreports@wiley.com).

Should you be planning a Press Release on your article, please get in contact with [emboreports@wiley.com](mailto:emboreports@wiley.com) as early as possible, in order to coordinate publication and release dates.

**YOU MUST COMPLETE ALL CELLS WITH A PINK BACKGROUND** ↓

PLEASE NOTE THAT THIS CHECKLIST WILL BE PUBLISHED ALONGSIDE YOUR PAPER

Corresponding Author Name: Lihong Shi

Journal Submitted to: Embo Reports

Manuscript Number: EMBOR-2020-50535V3

### Reporting Checklist For Life Sciences Articles (Rev. June 2017)

This checklist is used to ensure good reporting standards and to improve the reproducibility of published results. These guidelines are consistent with the Principles and Guidelines for Reporting Preclinical Research issued by the NIH in 2014. Please follow the journal's authorship guidelines in preparing your manuscript.

#### A- Figures

##### 1. Data

The data shown in figures should satisfy the following conditions:

- the data were obtained and processed according to the field's best practice and are presented to reflect the results of the experiments in an accurate and unbiased manner.
- figure panels include only data points, measurements or observations that can be compared to each other in a scientifically meaningful way.
- graphs include clearly labeled error bars for independent experiments and sample sizes. Unless justified, error bars should not be shown for technical replicates.
- if  $n < 5$ , the individual data points from each experiment should be plotted and any statistical test employed should be justified.
- Source Data should be included to report the data underlying graphs. Please follow the guidelines set out in the author ship guidelines on Data Presentation.

##### 2. Captions

Each figure caption should contain the following information, for each panel where they are relevant:

- a specification of the experimental system investigated (eg cell line, species name).
- the assay(s) and method(s) used to carry out the reported observations and measurements
- an explicit mention of the biological and chemical entity(ies) that are being measured.
- an explicit mention of the biological and chemical entity(ies) that are altered/varied/perturbed in a controlled manner.
- the exact sample size (n) for each experimental group/condition, given as a number, not a range;
- a description of the sample collection allowing the reader to understand whether the samples represent technical or biological replicates (including how many animals, litters, cultures, etc.).
- a statement of how many times the experiment shown was independently replicated in the laboratory.
- definitions of statistical methods and measures:
  - common tests, such as t-test (please specify whether paired vs. unpaired), simple  $\chi^2$  tests, Wilcoxon and Mann-Whitney tests, can be unambiguously identified by name only, but more complex techniques should be described in the methods section;
  - are tests one-sided or two-sided?
  - are there adjustments for multiple comparisons?
  - exact statistical test results, e.g., P values = x but not P values < x;
  - definition of 'center values' as median or average;
  - definition of error bars as s.d. or s.e.m.

Any descriptions too long for the figure legend should be included in the methods section and/or with the source data.

In the pink boxes below, please ensure that the answers to the following questions are reported in the manuscript itself. Every question should be answered. If the question is not relevant to your research, please write NA (non applicable). We encourage you to include a specific subsection in the methods section for statistics, reagents, animal models and human subjects.

#### B- Statistics and general methods

Please fill out these boxes ↓ (Do not worry if you cannot see all your text once you press return)

|                                                                                                                                                                                         |                                                                                                 |
|-----------------------------------------------------------------------------------------------------------------------------------------------------------------------------------------|-------------------------------------------------------------------------------------------------|
| 1.a. How was the sample size chosen to ensure adequate power to detect a pre-specified effect size?                                                                                     | Followed the Authoritative literature.                                                          |
| 1.b. For animal studies, include a statement about sample size estimate even if no statistical methods were used.                                                                       | NA                                                                                              |
| 2. Describe inclusion/exclusion criteria if samples or animals were excluded from the analysis. Were the criteria pre-established?                                                      | NA                                                                                              |
| 3. Were any steps taken to minimize the effects of subjective bias when allocating animals/samples to treatment (e.g. randomization procedure)? If yes, please describe.                | NA                                                                                              |
| For animal studies, include a statement about randomization even if no randomization was used.                                                                                          | NA                                                                                              |
| 4.a. Were any steps taken to minimize the effects of subjective bias during group allocation or/and when assessing results (e.g. blinding of the investigator)? If yes please describe. | NA                                                                                              |
| 4.b. For animal studies, include a statement about blinding even if no blinding was done                                                                                                | NA                                                                                              |
| 5. For every figure, are statistical tests justified as appropriate?                                                                                                                    | YES                                                                                             |
| Do the data meet the assumptions of the tests (e.g., normal distribution)? Describe any methods used to assess it.                                                                      | YES. Before one-way ANOVA test, the dependent variables was tested whether normally distributed |
| Is there an estimate of variation within each group of data?                                                                                                                            | YES                                                                                             |

#### USEFUL LINKS FOR COMPLETING THIS FORM

<http://www.antibodypedia.com>  
<http://1degreebio.org>  
<http://www.equator-network.org/reporting-guidelines/improving-bioscience-research-repor>  
  
<http://grants.nih.gov/grants/olaw/olaw.htm>  
<http://www.mrc.ac.uk/Ourresearch/Ethicsresearchguidance/Useofanimals/index.htm>  
<http://ClinicalTrials.gov>  
<http://www.consort-statement.org>  
<http://www.consort-statement.org/checklists/view/32-consort/66-title>  
  
<http://www.equator-network.org/reporting-guidelines/reporting-recommendations-for-tum>  
  
<http://datadryad.org>  
  
<http://figshare.com>  
  
<http://www.ncbi.nlm.nih.gov/gap>  
  
<http://www.ebi.ac.uk/ega>  
  
<http://biomodels.net/>  
  
<http://biomodels.net/miriam/>  
<http://jij.biochem.sun.ac.za>  
[http://oba.od.nih.gov/biosecurity/biosecurity\\_documents.html](http://oba.od.nih.gov/biosecurity/biosecurity_documents.html)  
<http://www.selectagents.gov/>

|                                                                                   |     |
|-----------------------------------------------------------------------------------|-----|
| Is the variance similar between the groups that are being statistically compared? | YES |
|-----------------------------------------------------------------------------------|-----|

### C- Reagents

|                                                                                                                                                                                                                                                                                                                              |                                                                                                                                                                                                        |
|------------------------------------------------------------------------------------------------------------------------------------------------------------------------------------------------------------------------------------------------------------------------------------------------------------------------------|--------------------------------------------------------------------------------------------------------------------------------------------------------------------------------------------------------|
| 6. To show that antibodies were profiled for use in the system under study (assay and species), provide a citation, catalog number and/or clone number, supplementary information or reference to an antibody validation profile. e.g., Antibodypedia (see link list at top right), 1DegreeBio (see link list at top right). | The antibodies for Flow cytometry was listed on page 21 ,lines521-526 with catalog number and company; The antibodies fo western was listed on page 24, lines 630-607 with catalog number and company. |
| 7. Identify the source of cell lines and report if they were recently authenticated (e.g., by STR profiling) and tested for mycoplasma contamination.                                                                                                                                                                        | The cell line information was provided on page 21 ,line 502 and tested for mycoplasma contamination.                                                                                                   |

\* for all hyperlinks, please see the table at the top right of the document

### D- Animal Models

|                                                                                                                                                                                                                                                                                                                                                                                    |    |
|------------------------------------------------------------------------------------------------------------------------------------------------------------------------------------------------------------------------------------------------------------------------------------------------------------------------------------------------------------------------------------|----|
| 8. Report species, strain, gender, age of animals and genetic modification status where applicable. Please detail housing and husbandry conditions and the source of animals.                                                                                                                                                                                                      | NA |
| 9. For experiments involving live vertebrates, include a statement of compliance with ethical regulations and identify the committee(s) approving the experiments.                                                                                                                                                                                                                 | NA |
| 10. We recommend consulting the ARRIVE guidelines (see link list at top right) (PLoS Biol. 8(6), e1000412, 2010) to ensure that other relevant aspects of animal studies are adequately reported. See author guidelines, under 'Reporting Guidelines'. See also: NIH (see link list at top right) and MRC (see link list at top right) recommendations. Please confirm compliance. | NA |

### E- Human Subjects

|                                                                                                                                                                                                                                                                                                                    |    |
|--------------------------------------------------------------------------------------------------------------------------------------------------------------------------------------------------------------------------------------------------------------------------------------------------------------------|----|
| 11. Identify the committee(s) approving the study protocol.                                                                                                                                                                                                                                                        | NA |
| 12. Include a statement confirming that informed consent was obtained from all subjects and that the experiments conformed to the principles set out in the WMA Declaration of Helsinki and the Department of Health and Human Services Belmont Report.                                                            | NA |
| 13. For publication of patient photos, include a statement confirming that consent to publish was obtained.                                                                                                                                                                                                        | NA |
| 14. Report any restrictions on the availability (and/or on the use) of human data or samples.                                                                                                                                                                                                                      | NA |
| 15. Report the clinical trial registration number (at ClinicalTrials.gov or equivalent), where applicable.                                                                                                                                                                                                         | NA |
| 16. For phase II and III randomized controlled trials, please refer to the CONSORT flow diagram (see link list at top right) and submit the CONSORT checklist (see link list at top right) with your submission. See author guidelines, under 'Reporting Guidelines'. Please confirm you have submitted this list. | NA |
| 17. For tumor marker prognostic studies, we recommend that you follow the REMARK reporting guidelines (see link list at top right). See author guidelines, under 'Reporting Guidelines'. Please confirm you have followed these guidelines.                                                                        | NA |

### F- Data Accessibility

|                                                                                                                                                                                                                                                                                                                                                                                                                                                                                                                                                                                                                                                                                                  |                                                                                                  |
|--------------------------------------------------------------------------------------------------------------------------------------------------------------------------------------------------------------------------------------------------------------------------------------------------------------------------------------------------------------------------------------------------------------------------------------------------------------------------------------------------------------------------------------------------------------------------------------------------------------------------------------------------------------------------------------------------|--------------------------------------------------------------------------------------------------|
| 18. Provide a "Data Availability" section at the end of the Materials & Methods, listing the accession codes for data generated in this study and deposited in a public database (e.g. RNA-Seq data: Gene Expression Omnibus GSE39462, Proteomics data: PRIDE PXD000208 etc.) Please refer to our author guidelines for 'Data Deposition'.<br><br>Data deposition in a public repository is mandatory for:<br>a. Protein, DNA and RNA sequences<br>b. Macromolecular structures<br>c. Crystallographic data for small molecules<br>d. Functional genomics data<br>e. Proteomics and molecular interactions                                                                                       | YES,We " Data Availability " section on page 29, lines 701-703.                                  |
| 19. Deposition is strongly recommended for any datasets that are central and integral to the study; please consider the journal's data policy. If no structured public repository exists for a given data type, we encourage the provision of datasets in the manuscript as a Supplementary Document (see author guidelines under 'Expanded View' or in unstructured repositories such as Dryad (see link list at top right) or Figshare (see link list at top right).                                                                                                                                                                                                                           | YES ,we provided 'one dataset and one table ,which named dataset EV1 and Table EV1, respectively |
| 20. Access to human clinical and genomic datasets should be provided with as few restrictions as possible while respecting ethical obligations to the patients and relevant medical and legal issues. If practically possible and compatible with the individual consent agreement used in the study, such data should be deposited in one of the major public access-controlled repositories such as dbGAP (see link list at top right) or EGA (see link list at top right).                                                                                                                                                                                                                    | NA                                                                                               |
| 21. Computational models that are central and integral to a study should be shared without restrictions and provided in a machine-readable form. The relevant accession numbers or links should be provided. When possible, standardized format (SBML, CellML) should be used instead of scripts (e.g. MATLAB). Authors are strongly encouraged to follow the MIRIAM guidelines (see link list at top right) and deposit their model in a public database such as Biomedels (see link list at top right) or JWS Online (see link list at top right). If computer source code is provided with the paper, it should be deposited in a public repository or included in supplementary information. | NA                                                                                               |

### G- Dual use research of concern

|                                                                                                                                                                                                                                                                                               |    |
|-----------------------------------------------------------------------------------------------------------------------------------------------------------------------------------------------------------------------------------------------------------------------------------------------|----|
| 22. Could your study fall under dual use research restrictions? Please check biosecurity documents (see link list at top right) and list of select agents and toxins (APHIS/CDC) (see link list at top right). According to our biosecurity guidelines, provide a statement only if it could. | NA |
|-----------------------------------------------------------------------------------------------------------------------------------------------------------------------------------------------------------------------------------------------------------------------------------------------|----|
