# Supplementary figures and images for: A splicing factor switch controls hematopoietic lineage specification of pluripotent stem cells
Source: PubMed Central journal article supplement — EMBO Rep. 2020 Dec 15;22(1):e50535. doi: 10.15252/embr.202050535 (PMC7788460; doi:10.15252/embr.202050535), 2020-12-15

Figure 3G

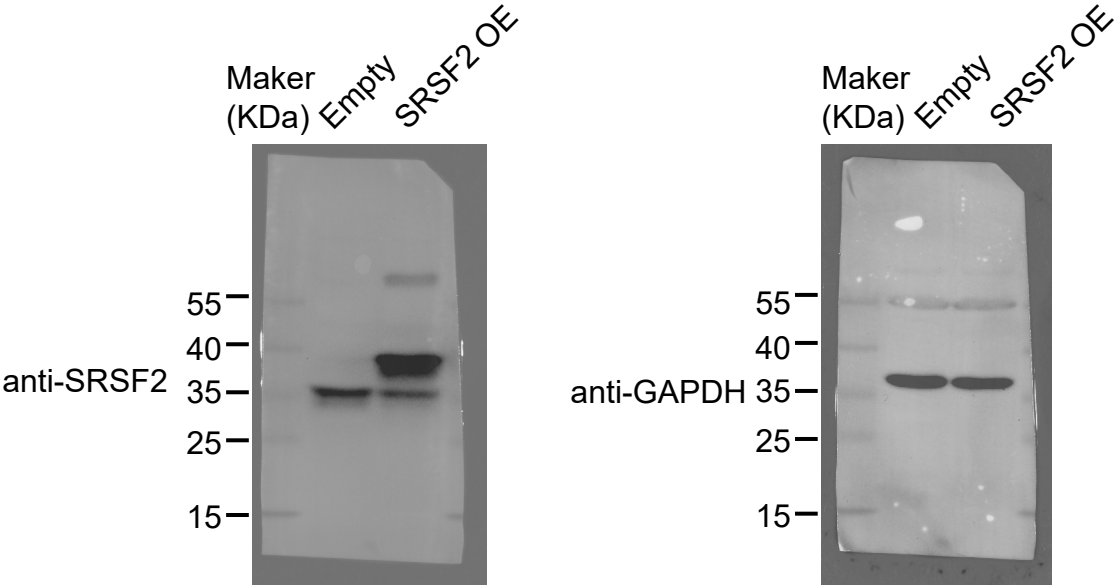

Figure 3J (Red square)

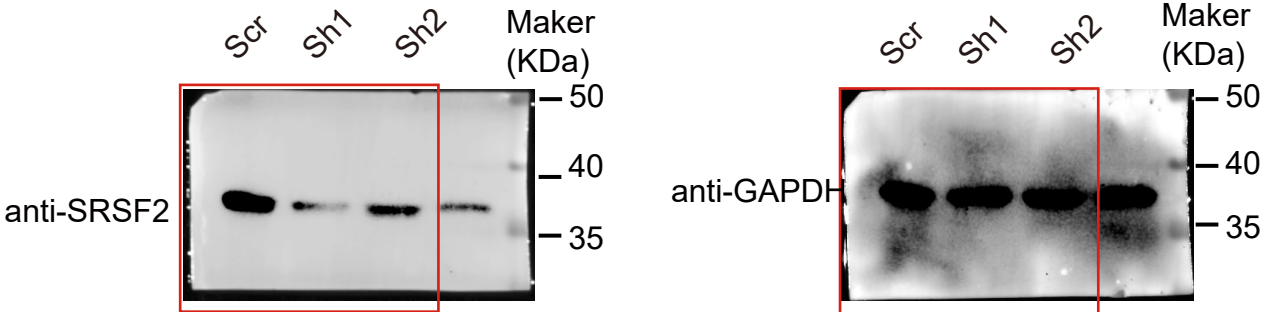

Supplement: EMBR-22-e50535-s004.pdf [file EMBR-22-e50535-s004.pdf]

Figure 4E

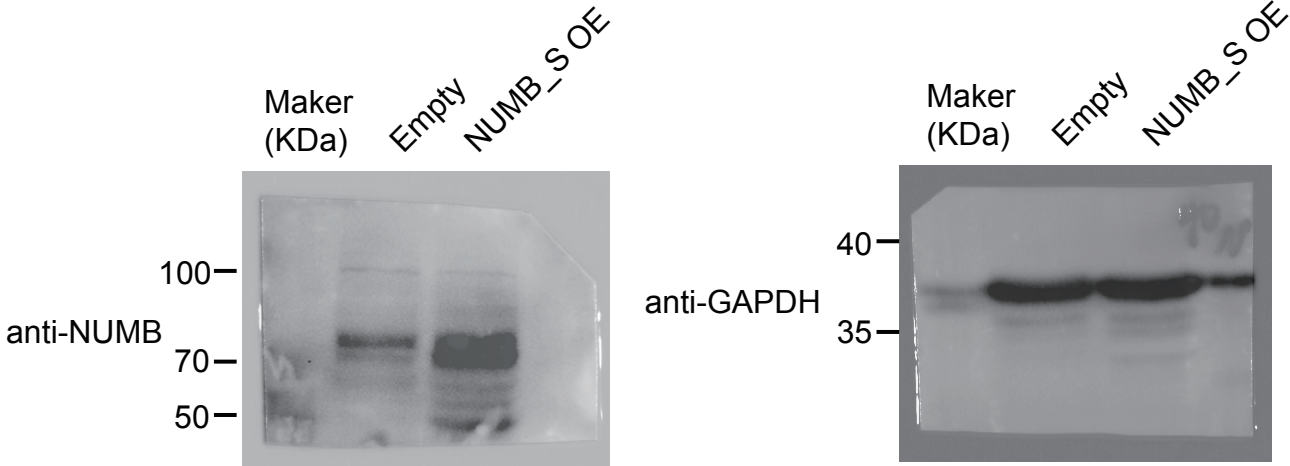

Supplement: EMBR-22-e50535-s005.pdf [file EMBR-22-e50535-s005.pdf]

Figure 5B

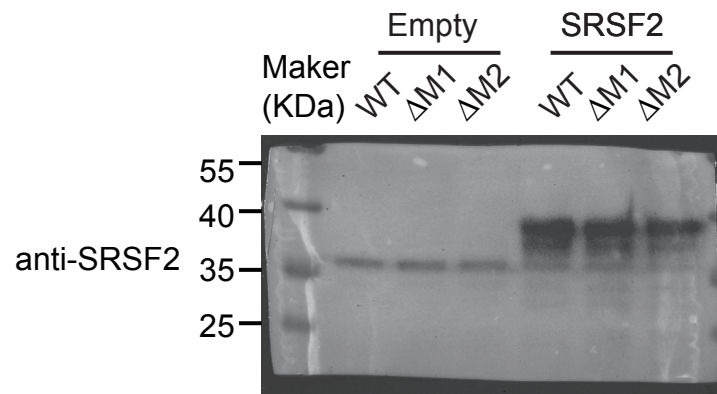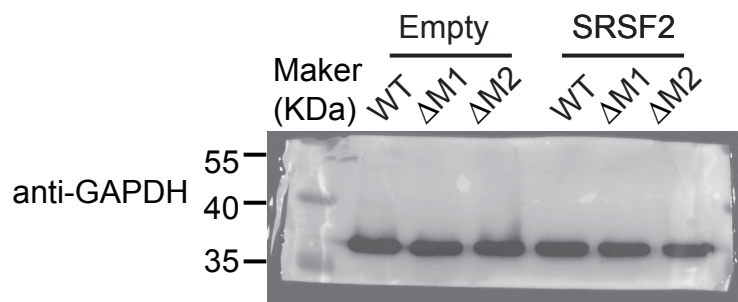

Supplement: EMBR-22-e50535-s006.pdf [file EMBR-22-e50535-s006.pdf]

Figure 6G

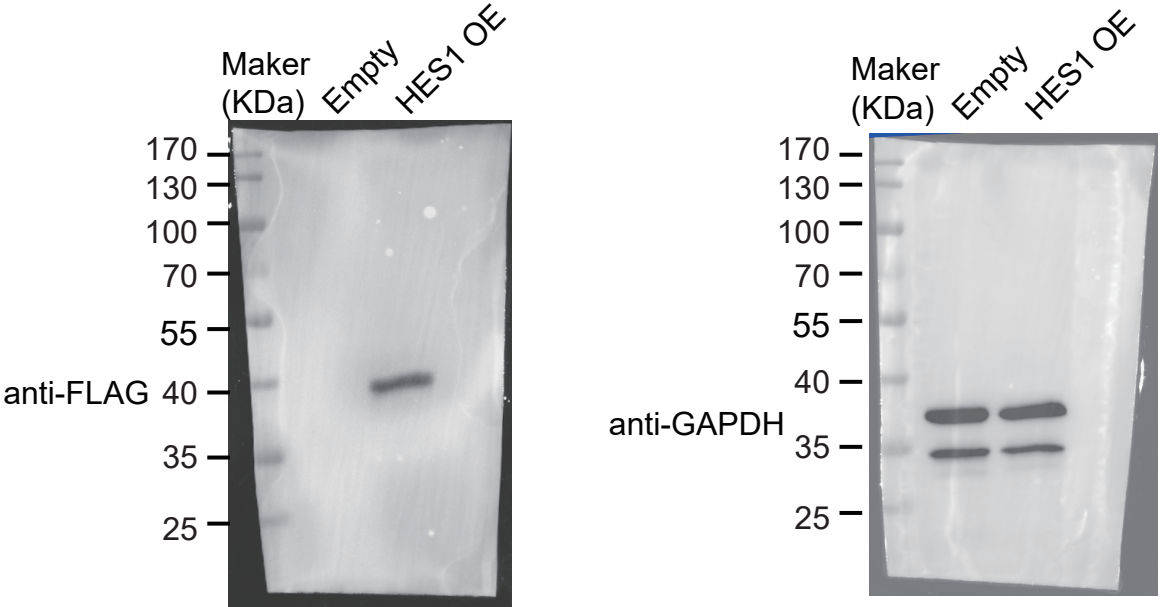

Supplement: EMBR-22-e50535-s007.pdf [file EMBR-22-e50535-s007.pdf]
